# Supplementary material
Source: PubMed Central journal article supplement (PMC3708595)
Supplement: NIHMS474972-supplement-1.pdf [file NIHMS474972-supplement-1.pdf]

## SUPPLEMENTARY INFORMATION

### The Mutational Landscape of Adenoid Cystic Carcinoma

Allen S. Ho<sup>1,2†</sup>, Kasthuri Kannan<sup>1†</sup>, David M. Roy<sup>1†</sup>, Luc G.T. Morris<sup>1,2</sup>, Ian Ganly<sup>2</sup>, Nora Katabi<sup>3</sup>, Deepa Ramaswami<sup>1</sup>, Logan A. Walsh<sup>1</sup>, Stephanie Eng<sup>1</sup>, Jason T. Huse<sup>1,3</sup>, Jianan Zhang<sup>1</sup>, Igor Dolgalev<sup>1</sup>, Kety Huberman<sup>1</sup>, Adriana Heguy<sup>1</sup>, Agnes Viale<sup>4</sup>, Marija Drobnjak<sup>5</sup>, Margaret A. Leversha<sup>6</sup>, Christine E. Rice<sup>6</sup>, Bhuvanesh Singh<sup>2</sup>, N. Gopalakrishna Iyer<sup>7</sup>, C. Rene Leemans<sup>8</sup>, Elisabeth Bloemena<sup>9</sup>, Robert L. Ferris<sup>10</sup>, Raja R. Seethala<sup>11</sup>, Benjamin E. Gross<sup>12</sup>, Yupu Liang<sup>1</sup>, Rileen Sinha<sup>12</sup>, Luke Peng<sup>1</sup>, Benjamin J. Raphael<sup>12</sup>, Sevin Turcan<sup>1</sup>, Yongxing Gong<sup>1</sup>, Nikolaus Schultz<sup>13</sup>, Seungwon Kim<sup>10</sup>, Simion Chiosea<sup>11</sup>, Jatin P. Shah<sup>2</sup>, Chris Sander<sup>13</sup>, William Lee<sup>13</sup>, and Timothy A. Chan<sup>1,14\*</sup>

<sup>1</sup>Human Oncology and Pathogenesis Program, Memorial Sloan-Kettering Cancer Center, New York, NY.

<sup>2</sup>Head and Neck Service, Department of Surgery, Memorial Sloan-Kettering Cancer Center, New York, NY.

<sup>3</sup>Department of Pathology, Memorial Sloan-Kettering Cancer Center, New York, NY.

<sup>4</sup>Genomics Core, Memorial Sloan-Kettering Cancer Center, New York, NY.

<sup>5</sup>Pathology Core, Memorial Sloan-Kettering Cancer Center, New York, NY.

<sup>6</sup>Molecular Cytogenetics Core, Memorial Sloan-Kettering Cancer Center, New York, NY.

<sup>7</sup>Department of Surgical Oncology, National Cancer Centre Singapore, Singapore.

<sup>8</sup>Department of Otolaryngology-Head and Neck Surgery, VU University Medical Center, Amsterdam, Netherlands.

<sup>9</sup>Department of Oral and Maxillofacial Surgery and Oral Pathology, VU University Medical Center, Academic Centre for Dentistry, Amsterdam, Netherlands.

<sup>10</sup>Department of Otolaryngology-Head and Neck Surgery, University of Pittsburgh Medical Center, Pittsburgh, PA.

<sup>11</sup>Department of Pathology, University of Pittsburgh Medical Center, Pittsburgh, PA.

<sup>12</sup>Department of Computer Science and Center for Computational Molecular Biology, Brown University, Rhode Island, RI.

<sup>13</sup>Computational Biology Center, Memorial Sloan-Kettering Cancer Center, New York, NY.

<sup>14</sup>Department of Radiation Oncology, Memorial Sloan-Kettering Cancer Center, New York, NY.

<sup>†</sup>These authors contributed equally to this work.

\*Correspondence and requests for materials should be addressed to T.A.C. ([chant@mskcc.org](mailto:chant@mskcc.org))

## **Index of Supplementary Figures and Tables**

---

**Supplementary Figure 1. Analysis pipeline.**

**Supplementary Figure 2. Validation rate as a function of sequencing depth.**

**Supplementary Figure 3. *MYB-NFIB* FISH.**

**Supplementary Figure 4. IGV visualization.**

**Supplementary Figure 5. Expression analysis of ACC samples.**

**Supplementary Figure 6. Validated ACC structural variations predicted by CREST.**

**Supplementary Figure 7. Comparative incidence of PI3K immunohistochemistry staining.**

**Supplementary Figure 8. Enrichment plots of ACC expression data.**

**Supplementary Figure 9. *FAT4* knockdown.**

**Supplementary Table 1. ACC exome sequencing data by patient.**

**Supplementary Table 2. ACC clinical data and *MYB-NFIB* FISH status.**

**Supplementary Table 3. Validated ACC nonsynonymous mutations.**

**Supplementary Table 4. Significantly mutated CHASM genes.**

**Supplementary Table 5. CHASM context table.**

**Supplementary Table 6. GISTIC2.0 output of significantly altered peaks with associated genes.**

**Supplementary Table 7. Mean CHASM gene expression.**

**Supplementary Table 8. Whole genome coverage data.**

**Supplementary Table 9. Validated ACC structural variants.**

**Supplementary Note.**

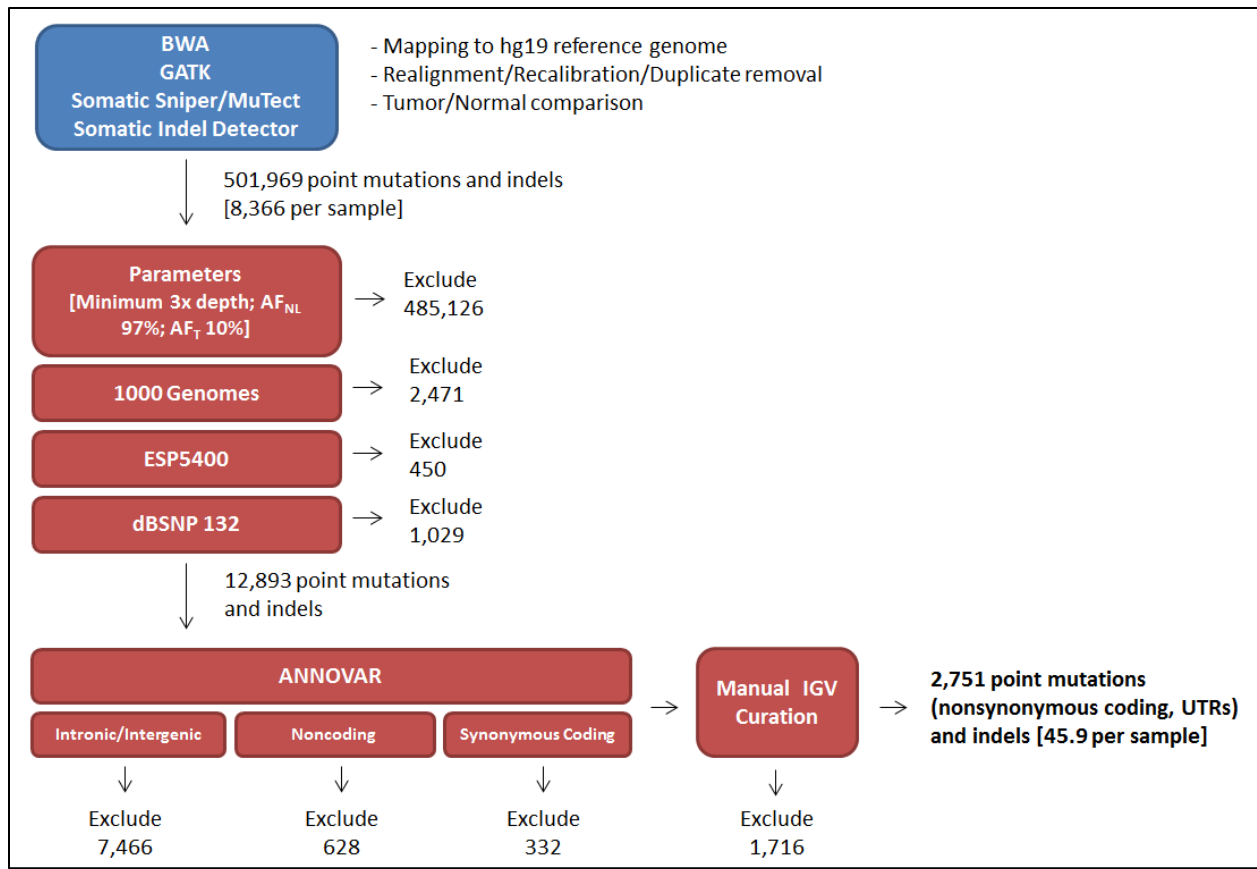

**Supplementary Figure 1. Analysis pipeline.** All 60 samples were evaluated by Somatic Sniper, MuTect, and Somatic Indel Detector, with SNPs (single nucleotide polymorphisms) removed by public databases. Annotation was performed by Annovar, and resulting candidates were manually reviewed using IGV to exclude calls made secondary to poor alignment or machine artifact.

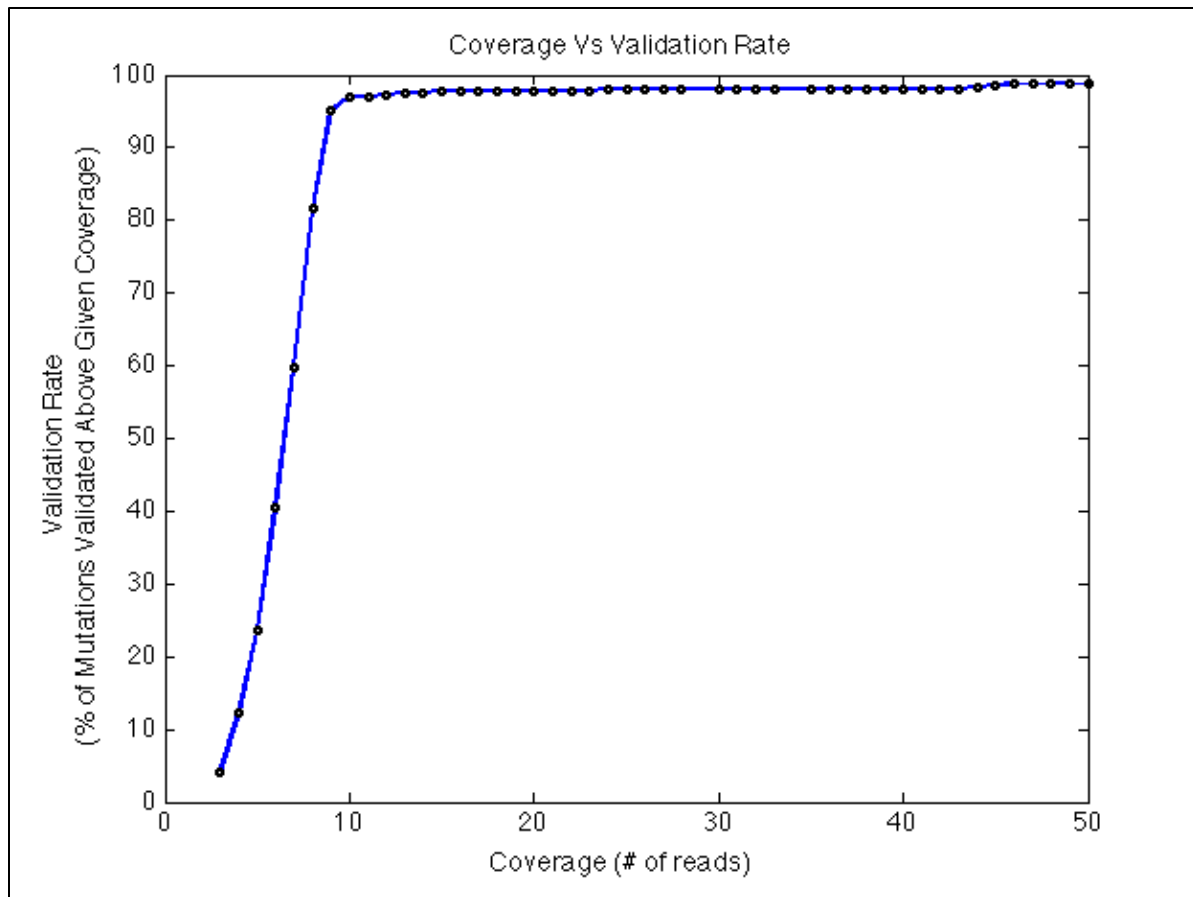

**Supplementary Figure 2. Validation rate as a function of sequencing depth.** Validation was performed on candidates identified with as low as 3x coverage. Deep resequencing was performed with SOLiD or MiSeq. Validation rate at minimum 10x coverage was 97%.

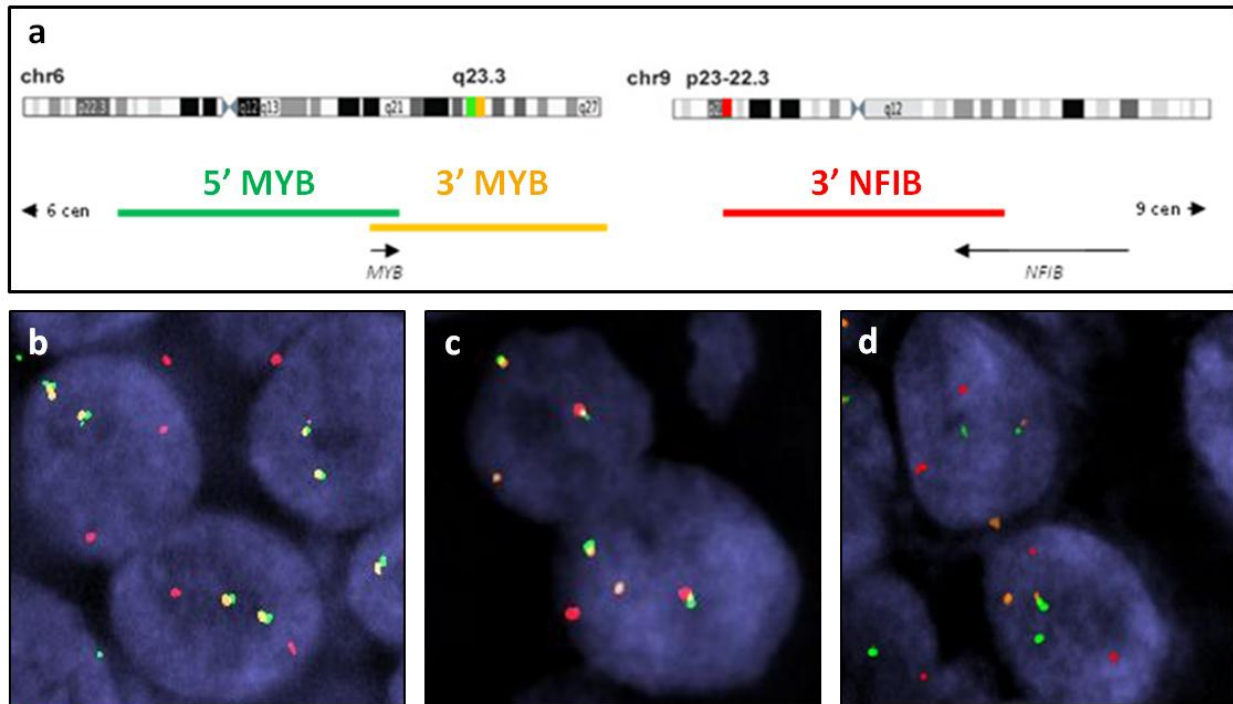

**Supplementary Figure 3. MYB-NFIB FISH.** Analysis was performed using a 3-color FISH probe mix consisting of 5' MYB (green), 3' MYB (orange), and 3' NFIB (red). (a). Mapping of FISH probes to chr6 and chr9. (b). No MYB-NFIB abnormality detected (G-O, R). (c). Classic MYB-NFIB translocation (G-R). (d). MYB with unknown fusion partner (O, G).

**a**

NORMAL

TUMOR  
**Sample 1346**  
 Normal 183x  
 Tumor 105x  
 Tumor AF (G to T): 37%  
 Nonsense mutation

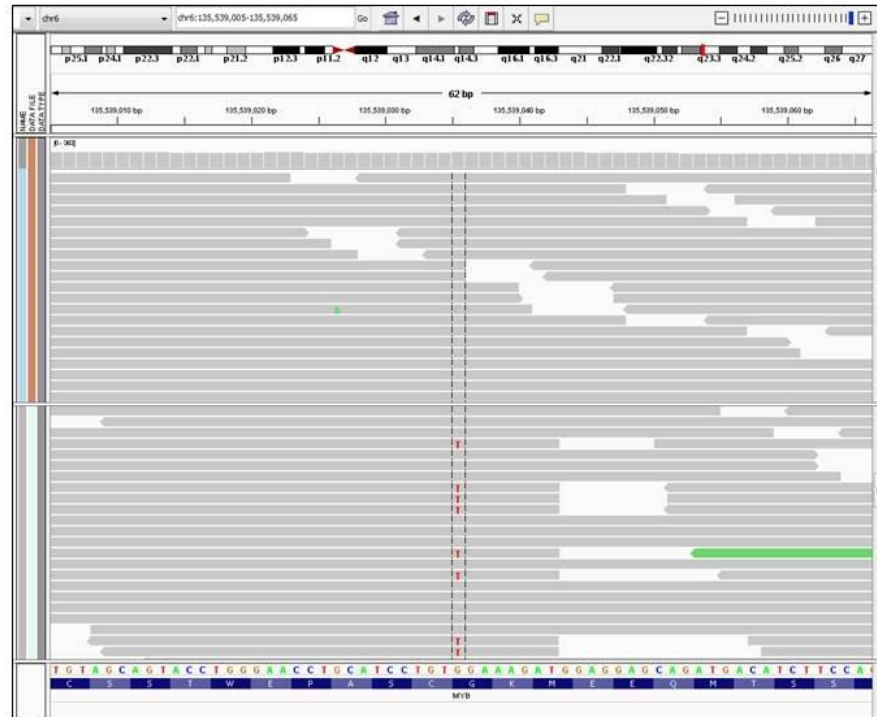

**b**

NORMAL

TUMOR  
**Sample 540**  
 Normal 357x  
 Tumor 448x  
 Tumor AF (G to C): 26%  
 Nonsense mutation

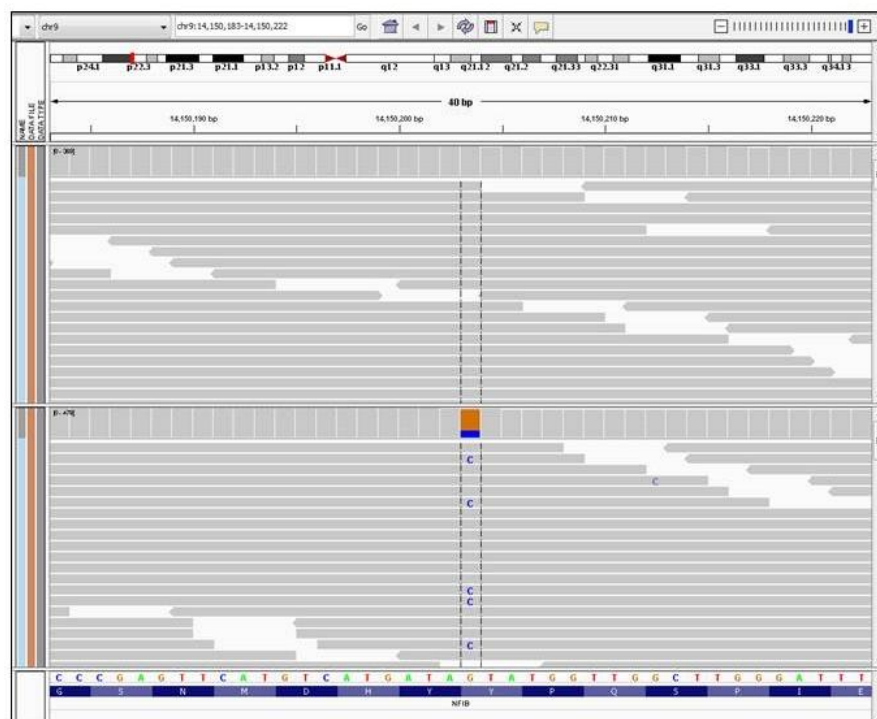

C

NORMAL

TUMOR

Sample 2020  
Normal coverage: 137x  
Tumor coverage: 115x  
Tumor AF (GA to --): 38%  
Frameshift deletion

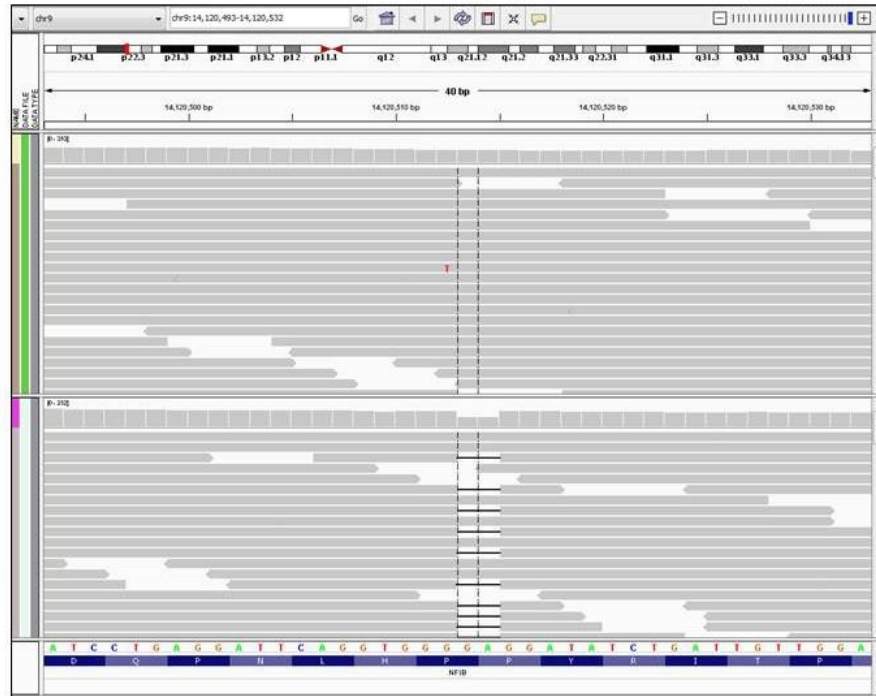

**Supplementary Figure 4. IGV visualization.** hg19 coordinates are listed and visualized within brackets, with reference genome and predicted codons of the gene listed at the bottom. Variant calls are listed if different from the reference genome. Representative somatic mutations are depicted. (a). *MYB* point mutation. (b). *NFIB* point mutation. (c). *NFIB* indel.

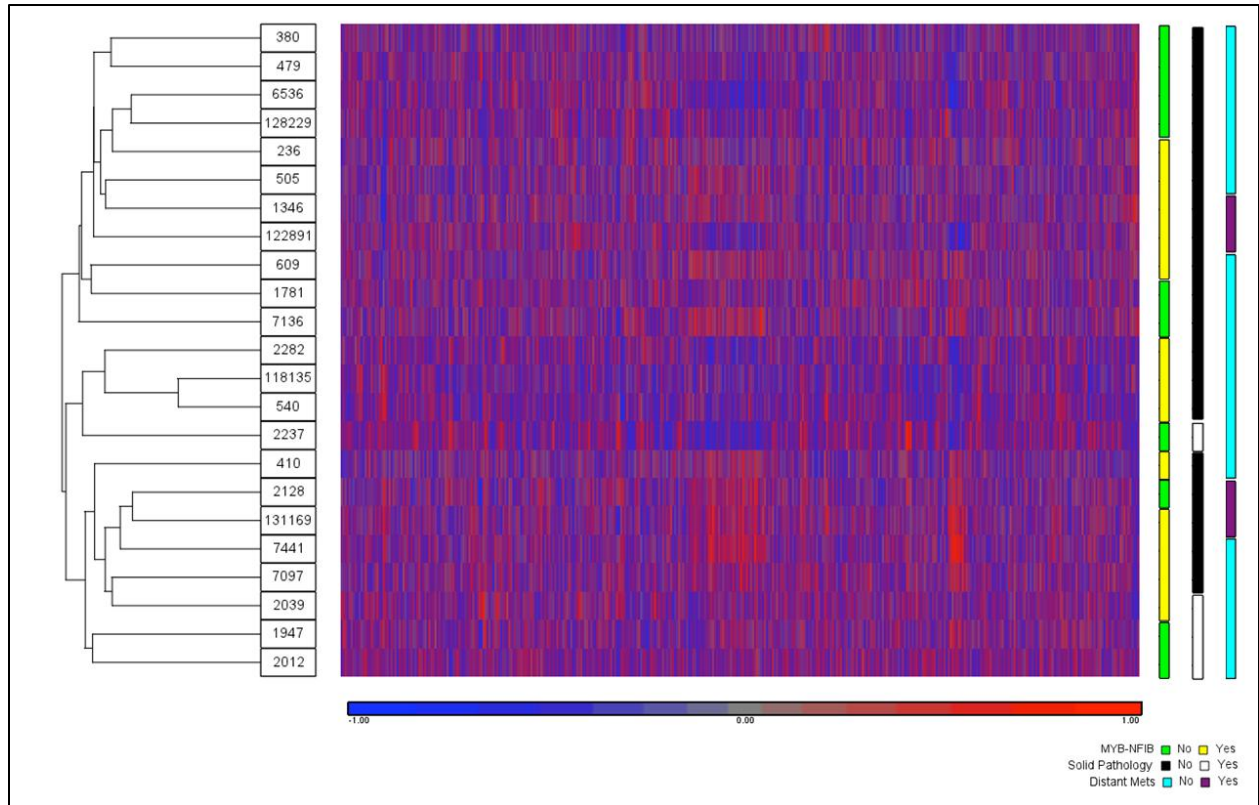

**Supplementary Figure 5. Expression analysis of ACC samples.** Unsupervised hierarchical clustering of 23 ACC samples with Pearson dissimilarity metric after quantile normalization. Data was clustered via average agglomeration method. Tumor IDs and annotations are listed on the left and right sides, respectively.



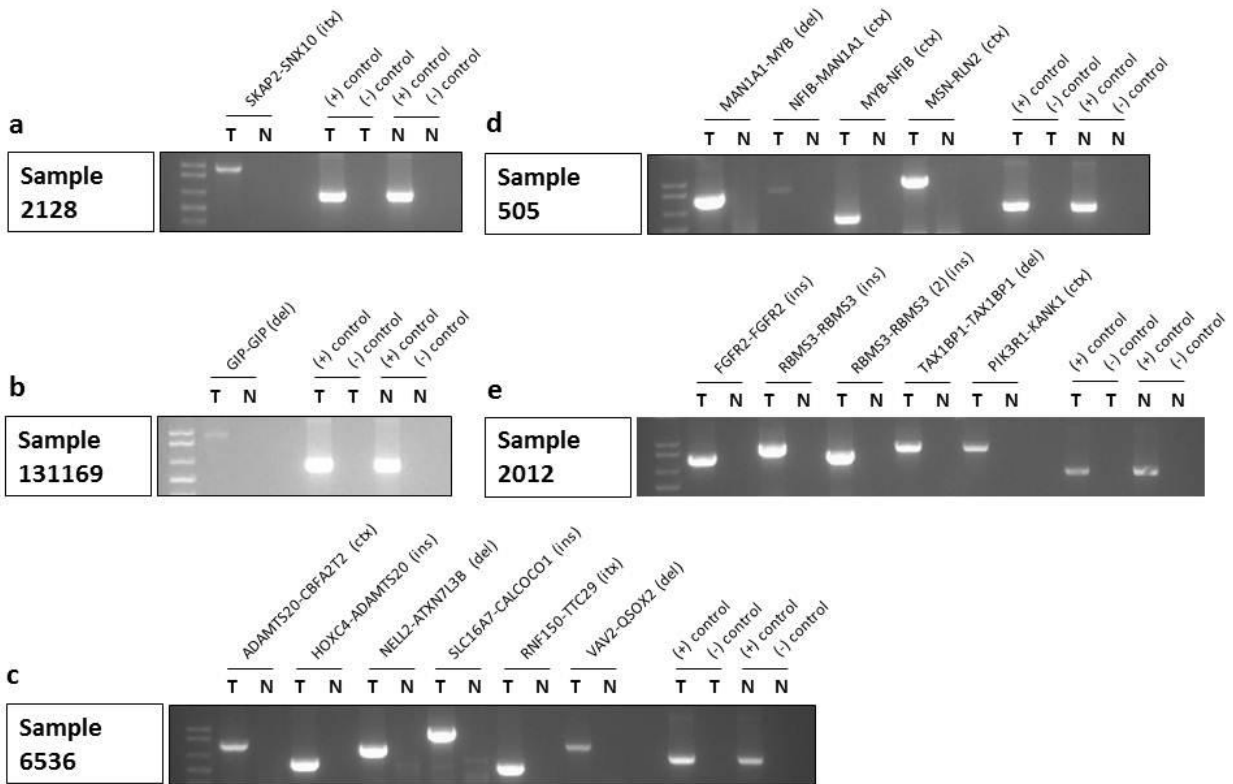

**Supplementary Figure 6. Validated ACC structural variations predicted by CREST.** Primers tested on tumor (T) and normal (N) whole-genome-amplified (WGA) DNA. Positive controls were performed using T and N DNA with standard primers for *PIK3CA* amplifying a 569bp region. Negative controls were performed using primers without DNA. ctx, inter-chromosomal translocation; itx, intra-chromosomal translocation; ins, insertion; del, deletion. (a). Sample 2128. (b). Sample 131169. (c). Sample 6536. (d). Sample 505. (e). Sample 2012.

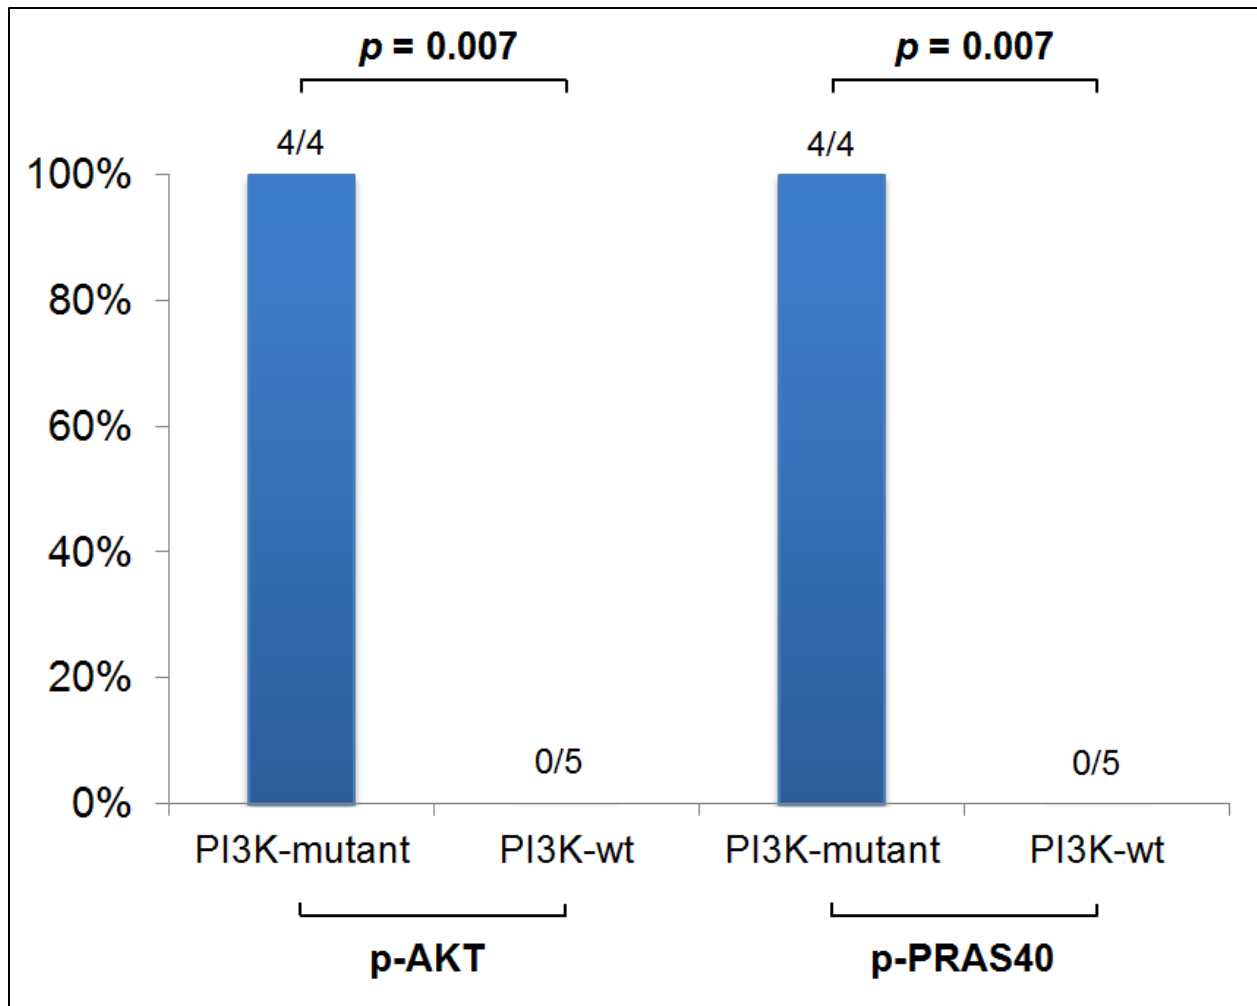

**Supplementary Figure 7. Comparative incidence of PI3K immunohistochemistry staining.** All 4 PI3K-mutant ACC samples demonstrated positive staining for both p-AKT and p-PRAS40, while none of the 5 PI3K-wt ACC samples stained positive ( $p = 0.007$ ). wt, wildtype.

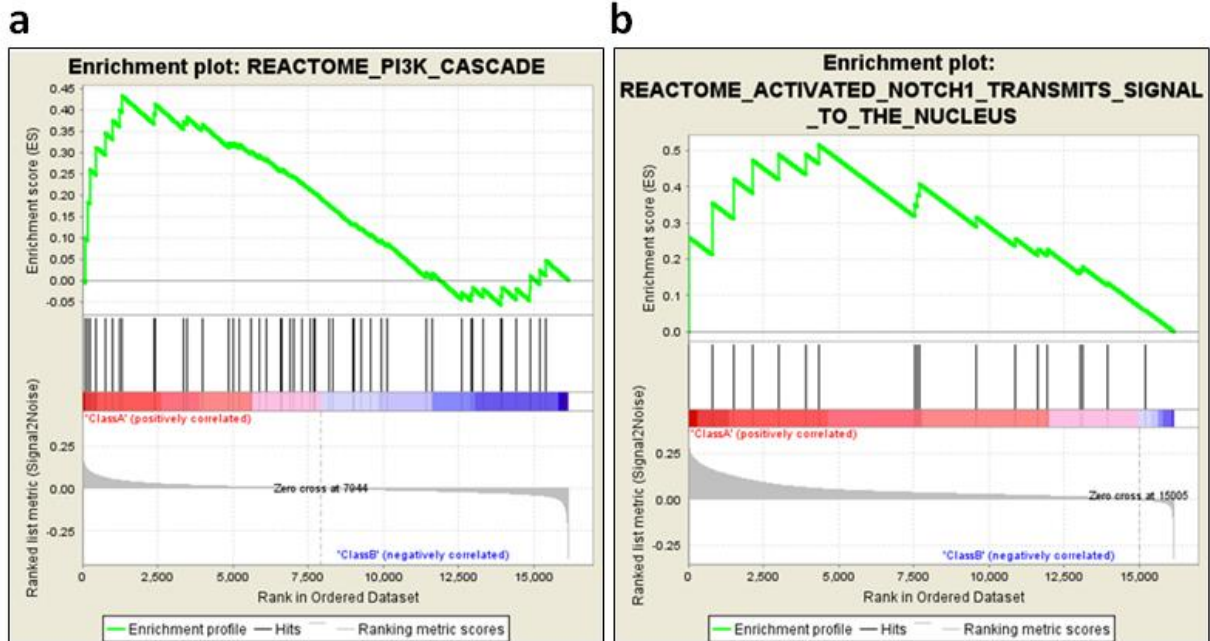

**Supplementary Figure 8. Enrichment plots of ACC expression data.** Analysis was performed for 23 ACC samples with expression data using GSEA. **(a)**. PI3K-altered samples demonstrated significant enrichment of the Reactome PI3K Cascade pathway ( $p < 0.001$ ). **(b)**. Notch pathway-mutated samples demonstrated enrichment of the Reactome Notch nuclear signaling pathway with borderline significance ( $p = 0.10$ ).

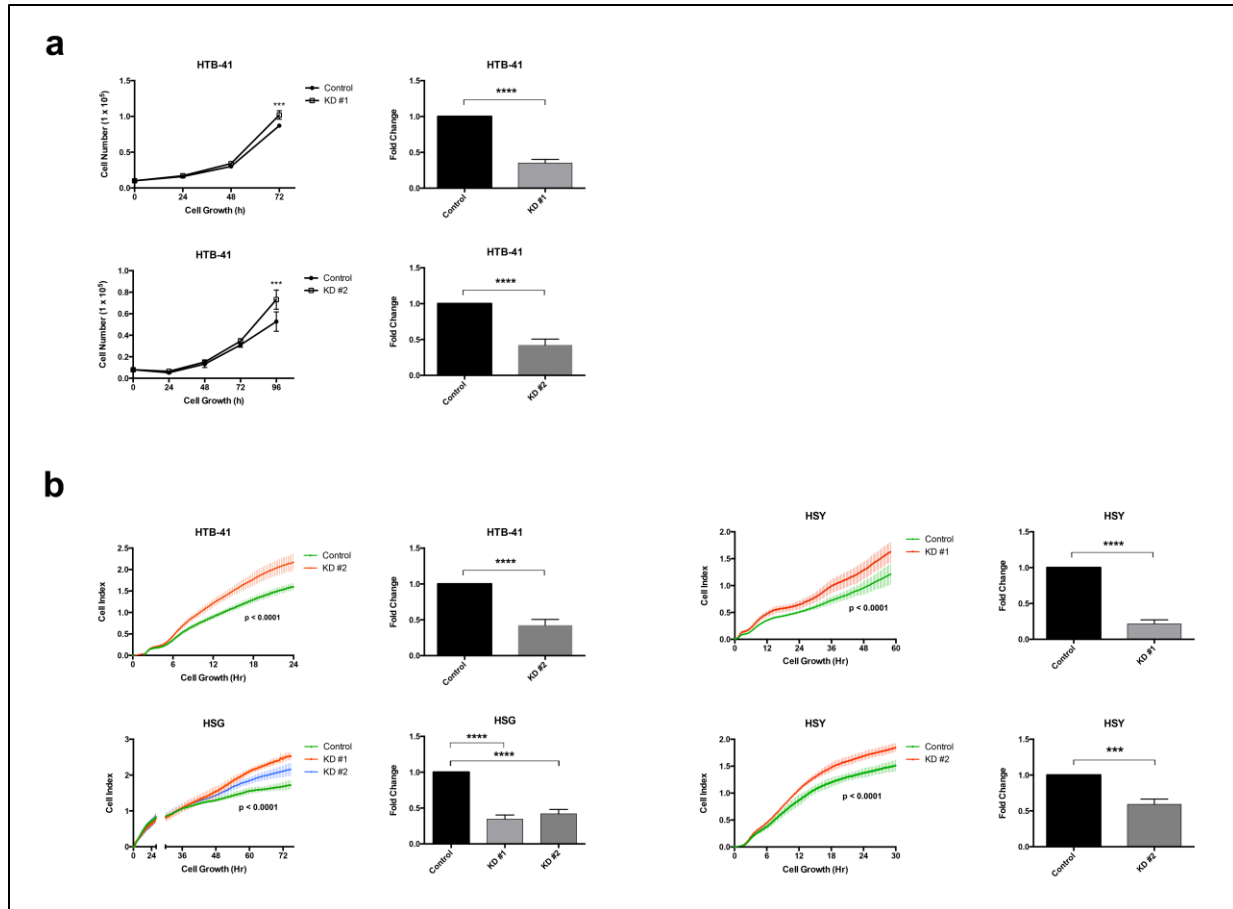

**Supplementary Figure 9. *FAT4* knockdown.** RNAi knockdown in HSG (human immortalized salivary), HTB-41 (human salivary epidermoid carcinoma), and HSY (human salivary adenocarcinoma) cells demonstrated increased growth via (a). standard growth curves using Vi-Cell XR Cell Viability Analyzer or (b). the xCELLigence System in triplicate or quadruplicate, respectively. \*\*\* $p < 0.001$ , \*\*\*\* $p < 0.0001$  (ANOVA) for knockdown compared to RNAi control. Error bars,  $\pm 1$  S.E.M. Relative knockdown fold change normalized to respective controls. KD, knockdown.

**Supplementary Table 1. ACC exome sequencing data by patient**

| Normal Statistics                         | 236            | 380            | 410            | 479            | 540            | 609            | 705            | 1346           | 1739           | 1781           |
|-------------------------------------------|----------------|----------------|----------------|----------------|----------------|----------------|----------------|----------------|----------------|----------------|
| Target Regions                            | 334,378        | 334,378        | 334,378        | 334,378        | 334,378        | 334,378        | 334,378        | 334,378        | 334,378        | 334,378        |
| Bases in Target Region                    | 51,756,122     | 51,756,122     | 51,756,122     | 51,756,122     | 51,756,122     | 51,756,122     | 51,756,122     | 51,756,122     | 51,756,122     | 51,756,122     |
| Bases Sequenced (after quality filtering) | 13,885,265,850 | 9,544,761,387  | 12,932,070,736 | 10,928,308,862 | 8,107,276,801  | 13,169,065,240 | 13,357,339,297 | 11,974,972,927 | 9,307,967,458  | 12,876,936,401 |
| Bases Mapped to Genome                    | 8,161,626,110  | 5,486,153,397  | 7,647,695,074  | 6,522,182,112  | 4,889,976,689  | 7,842,220,038  | 7,926,021,446  | 7,246,713,051  | 5,338,730,644  | 7,698,974,374  |
| Bases Mapped to Targeted Region           | 3,637,693,889  | 2,233,045,476  | 3,532,133,856  | 3,126,584,094  | 2,309,526,210  | 3,176,530,437  | 3,687,914,371  | 3,098,245,204  | 2,428,604,586  | 3,381,882,279  |
| Mean Target Coverage                      | 161.15         | 108.45         | 151.11         | 128.95         | 96.80          | 154.94         | 156.67         | 143.27         | 105.43         | 151.95         |
| Targeted bases with at least 10 reads (%) | 94.62          | 93.34          | 94.45          | 93.98          | 93.01          | 94.69          | 94.57          | 94.44          | 93.12          | 94.75          |
| Normal Statistics                         | 1947           | 2020           | 2039           | 2237           | 2238           | 2282           | 7097           | 7136           | 7441           | 65103          |
| Target Regions                            | 334,378        | 334,378        | 334,378        | 334,378        | 334,378        | 334,378        | 334,378        | 334,378        | 334,378        | 334,378        |
| Bases in Target Region                    | 51,756,122     | 51,756,122     | 51,756,122     | 51,756,122     | 51,756,122     | 51,756,122     | 51,756,122     | 51,756,122     | 51,756,122     | 51,756,122     |
| Bases Sequenced (after quality filtering) | 15,468,580,143 | 13,550,105,978 | 13,468,967,575 | 2,170,771,349  | 15,656,513,542 | 7,812,359,583  | 6,240,432,708  | 6,840,280,174  | 14,656,750,005 | 6,807,918,488  |
| Bases Mapped to Genome                    | 9,269,585,320  | 8,065,119,738  | 7,830,086,743  | 1,270,607,588  | 9,370,809,031  | 4,521,617,727  | 3,701,984,663  | 4,024,792,622  | 9,085,643,975  | 4,073,105,997  |
| Bases Mapped to Targeted Region           | 4,151,170,675  | 3,751,183,972  | 3,586,751,325  | 592,371,234    | 4,454,610,860  | 2,018,314,505  | 1,718,246,565  | 1,616,976,535  | 3,844,581,162  | 1,989,101,314  |
| Mean Target Coverage                      | 183.18         | 159.13         | 154.58         | 25.35          | 185.08         | 89.32          | 73.34          | 79.69          | 179.15         | 80.68          |
| Targeted bases with at least 10 reads (%) | 95.04          | 94.93          | 94.64          | 78.28          | 94.96          | 93.21          | 91.68          | 92.23          | 95.19          | 91.61          |
| Normal Statistics                         | 65115          | 111097         | 118135         | 122891         | 128229         | 142990         | 11 17815       | 148632         | 3492           | 671204         |
| Target Regions                            | 334,378        | 334,378        | 334,378        | 334,378        | 334,378        | 334,378        | 334,378        | 334,378        | 334,378        | 334,378        |
| Bases in Target Region                    | 51,756,122     | 51,756,122     | 51,756,122     | 51,756,122     | 51,756,122     | 51,756,122     | 51,756,122     | 51,756,122     | 51,756,122     | 51,756,122     |
| Bases Sequenced (after quality filtering) | 9,502,417,923  | 13,531,646,643 | 11,640,983,958 | 14,110,188,629 | 12,480,669,926 | 12,365,748,984 | 9,693,613,611  | 3,708,779,988  | 10,683,915,736 | 11,550,643,232 |
| Bases Mapped to Genome                    | 5,606,206,430  | 8,148,979,981  | 6,734,984,342  | 8,432,492,276  | 7,451,729,915  | 7,288,068,948  | 5,499,226,097  | 2,282,164,045  | 6,010,999,641  | 6,625,482,522  |
| Bases Mapped to Targeted Region           | 2,583,132,493  | 3,566,588,515  | 2,981,934,522  | 3,770,580,489  | 3,457,274,804  | 3,302,151,160  | 3,119,573,484  | 1,404,238,359  | 3,587,331,405  | 3,800,211,138  |
| Mean Target Coverage                      | 110.77         | 161.14         | 133.12         | 166.67         | 147.32         | 143.88         | 103.88         | 45.46          | 122.43         | 130.97         |
| Targeted bases with at least 10 reads (%) | 93.21          | 94.16          | 93.95          | 94.53          | 94.05          | 94.18          | 91.96          | 86.08          | 93.91          | 93.98          |
| Normal Statistics                         | 05 6986        | 07 16582       | 09 12352       | 11 9089        | 11 3318        | 2000120        | 2000136        | 2000756        | 2453           | 352            |
| Target Regions                            | 334,378        | 334,378        | 334,378        | 334,378        | 334,378        | 334,378        | 334,378        | 334,378        | 334,378        | 334,378        |
| Bases in Target Region                    | 51,756,122     | 51,756,122     | 51,756,122     | 51,756,122     | 51,756,122     | 51,756,122     | 51,756,122     | 51,756,122     | 51,756,122     | 51,756,122     |
| Bases Sequenced (after quality filtering) | 8,711,481,920  | 8,900,511,298  | 7,175,692,061  | 6,919,563,871  | 6,983,249,972  | 6,520,977,291  | 7,658,756,901  | 9,403,179,548  | 11,586,345,972 | 5,243,776,051  |
| Bases Mapped to Genome                    | 5,425,390,032  | 5,494,324,065  | 4,498,447,739  | 4,391,023,025  | 4,521,870,919  | 4,143,315,757  | 4,838,618,132  | 5,922,214,171  | 6,563,316,135  | 3,209,265,790  |
| Bases Mapped to Targeted Region           | 3,378,726,747  | 3,391,536,359  | 2,819,974,677  | 2,786,354,398  | 2,927,943,073  | 2,632,463,953  | 3,056,777,650  | 3,729,715,729  | 3,717,770,735  | 1,964,032,152  |
| Mean Target Coverage                      | 107.45         | 108.89         | 89.30          | 87.17          | 89.78          | 82.14          | 95.94          | 117.24         | 130.05         | 63.66          |
| Targeted bases with at least 10 reads (%) | 92.30          | 92.28          | 90.90          | 91.31          | 91.17          | 90.98          | 91.97          | 93.31          | 93.16          | 89.60          |
| Normal Statistics                         | 36773720       | 4133           | 4332           | 6112           | 6277           | 80872          | 9534           | 980452         | 990149         | 505            |
| Target Regions                            | 334,378        | 334,378        | 334,378        | 334,378        | 334,378        | 334,378        | 334,378        | 334,378        | 334,378        | 334,378        |
| Bases in Target Region                    | 51,756,122     | 51,756,122     | 51,756,122     | 51,756,122     | 51,756,122     | 51,756,122     | 51,756,122     | 51,756,122     | 51,756,122     | 51,756,122     |
| Bases Sequenced (after quality filtering) | 8,614,178,781  | 7,689,277,585  | 7,114,654,397  | 8,681,212,156  | 6,244,238,933  | 8,016,626,583  | 6,265,105,092  | 8,560,604,929  | 8,451,240,222  | 3,041,092,154  |
| Bases Mapped to Genome                    | 5,393,443,722  | 4,910,982,523  | 4,366,207,359  | 5,381,820,371  | 3,997,590,874  | 5,096,708,838  | 4,061,579,525  | 5,339,025,123  | 5,339,025,123  | 2,230,493,557  |
| Bases Mapped to Targeted Region           | 3,376,765,000  | 3,136,418,632  | 2,679,406,104  | 3,336,265,793  | 2,559,173,728  | 3,240,191,870  | 2,632,959,543  | 3,349,164,015  | 3,372,742,256  | 1,618,439,433  |
| Mean Target Coverage                      | 106.72         | 97.42          | 86.66          | 106.72         | 79.27          | 101.12         | 80.59          | 105.97         | 105.86         | 44.11          |
| Targeted bases with at least 10 reads (%) | 92.41          | 92.02          | 91.31          | 92.89          | 90.91          | 92.08          | 91.37          | 92.61          | 92.42          | 96.10          |
| Normal Statistics                         | 2012           | 2128           | 6536           | 131169         | 06 2532        | 09 4178        | 09 4615        | 10 5283        | 10 5342        | 11 6165        |
| Target Regions                            | 334,378        | 334,378        | 334,378        | 334,378        | 334,378        | 334,378        | 334,378        | 334,378        | 334,378        | 334,378        |
| Bases in Target Region                    | 51,756,122     | 51,756,122     | 51,756,122     | 51,756,122     | 51,756,122     | 51,756,122     | 51,756,122     | 51,756,122     | 51,756,122     | 51,756,122     |
| Bases Sequenced (after quality filtering) | 3,061,924,282  | 2,781,227,711  | 3,192,634,779  | 2,957,697,435  | 5,735,671,124  | 7,360,874,536  | 5,626,929,694  | 6,175,124,594  | 6,436,463,092  | 7,394,943,739  |
| Bases Mapped to Genome                    | 2,250,134,459  | 2,037,134,931  | 2,340,080,960  | 2,169,958,625  | 3,649,521,459  | 4,408,208,539  | 3,558,143,068  | 3,928,253,799  | 4,037,460,368  | 4,547,903,889  |
| Bases Mapped to Targeted Region           | 1,638,520,911  | 1,478,224,554  | 1,694,646,850  | 1,576,728,626  | 2,322,048,173  | 2,639,842,459  | 2,249,874,350  | 2,498,829,022  | 2,532,517,203  | 2,796,865,389  |
| Mean Target Coverage                      | 44.42          | 40.23          | 46.27          | 42.87          | 72.57          | 87.30          | 70.68          | 77.99          | 80.23          | 90.22          |
| Targeted bases with at least 10 reads (%) | 96.23          | 95.94          | 96.21          | 96.14          | 88.71          | 91.32          | 89.20          | 89.70          | 90.04          | 91.32          |
| Tumor Statistics                          | 236            | 380            | 410            | 479            | 540            | 609            | 705            | 1346           | 1739           | 1781           |
| Target Regions                            | 334,378        | 334,378        | 334,378        | 334,378        | 334,378        | 334,378        | 334,378        | 334,378        | 334,378        | 334,378        |
| Bases in Target Region                    | 51,756,122     | 51,756,122     | 51,756,122     | 51,756,122     | 51,756,122     | 51,756,122     | 51,756,122     | 51,756,122     | 51,756,122     | 51,756,122     |
| Bases Sequenced (after quality filtering) | 9,322,764,865  | 9,684,882,834  | 13,320,125,241 | 9,582,902,437  | 9,539,781,882  | 10,242,047,276 | 11,456,158,233 | 8,899,941,751  | 7,598,541,111  | 8,865,593,160  |
| Bases Mapped to Genome                    | 5,530,237,371  | 5,609,881,930  | 7,945,766,835  | 5,712,587,504  | 5,671,683,358  | 6,155,361,401  | 6,926,897,598  | 5,414,508,825  | 4,312,619,875  | 5,317,431,940  |
| Bases Mapped to Targeted Region           | 2,431,501,586  | 2,438,783,998  | 3,783,964,865  | 2,712,622,176  | 2,583,843,116  | 2,929,274,937  | 3,074,261,057  | 2,679,792,024  | 1,914,889,477  | 2,609,726,470  |
| Mean Target Coverage                      | 109.30         | 110.90         | 157.01         | 112.96         | 112.19         | 121.70         | 136.94         | 107.20         | 85.16          | 105.20         |
| Targeted bases with at least 10 reads (%) | 93.18          | 93.48          | 94.72          | 93.50          | 93.72          | 93.66          | 94.25          | 93.12          | 92.65          | 93.12          |
| Normal Statistics                         | 1947           | 2020           | 2039           | 2237           | 2238           | 2282           | 7097           | 7136           | 7441           | 65103          |
| Target Regions                            | 334,378        | 334,378        | 334,378        | 334,378        | 334,378        | 334,378        | 334,378        | 334,378        | 334,378        | 334,378        |
| Bases in Target Region                    | 51,756,122     | 51,756,122     | 51,756,122     | 51,756,122     | 51,756,122     | 51,756,122     | 51,756,122     | 51,756,122     | 51,756,122     | 51,756,122     |
| Bases Sequenced (after quality filtering) | 9,277,328,540  | 10,447,491,388 | 10,830,032,846 | 2,064,510,597  | 10,066,684,535 | 6,297,736,527  | 5,021,219,537  | 7,639,912,893  | 12,947,280,921 | 6,277,860,581  |
| Bases Mapped to Genome                    | 5,615,020,665  | 6,229,389,485  | 6,470,217,275  | 1,174,222,815  | 6,077,984,821  | 3,631,143,992  | 3,003,742,001  | 4,479,996,072  | 8,040,849,510  | 3,742,078,006  |
| Bases Mapped to Targeted Region           | 2,276,407,988  | 2,842,869,103  | 2,293,355,573  | 538,108,741    | 2,901,958,165  | 1,640,946,650  | 1,520,875,676  | 1,869,717,161  | 3,683,931,285  | 1,851,838,401  |
| Mean Target Coverage                      | 110.93         | 122.95         | 127.70         | 23.44          | 120.18         | 71.75          | 59.64          | 88.68          | 158.59         | 74.21          |
| Targeted bases with at least 10 reads (%) | 93.04          | 94.17          | 94.61          | 76.03          | 93.82          | 92.05          | 89.76          | 92.47          | 94.67          | 91.40          |

| Tumor Statistics                          | 65115         | 111097         | 118135        | 122891         | 128229         | 142990         | 11_17815      | 148632         | 3492          | 671204        |
|-------------------------------------------|---------------|----------------|---------------|----------------|----------------|----------------|---------------|----------------|---------------|---------------|
| Target Regions                            | 334,378       | 334,378        | 334,378       | 334,378        | 334,378        | 334,378        | 334,378       | 334,378        | 334,378       | 334,378       |
| Bases in Target Region                    | 51,756,122    | 51,756,122     | 51,756,122    | 51,756,122     | 51,756,122     | 51,756,122     | 51,756,122    | 51,756,122     | 51,756,122    | 51,756,122    |
| Bases Sequenced (after quality filtering) | 9,858,130,744 | 11,027,006,763 | 9,842,210,232 | 13,944,245,771 | 14,074,835,158 | 14,043,365,017 | 7,550,309,404 | 11,075,612,898 | 9,169,485,635 | 6,937,609,575 |
| Bases Mapped to Genome                    | 5,833,736,193 | 6,590,267,317  | 5,862,342,241 | 8,389,961,519  | 8,438,594,552  | 8,394,354,906  | 4,569,024,414 | 6,663,287,704  | 5,576,597,799 | 3,974,107,117 |
| Bases Mapped to Targeted Region           | 2,469,484,702 | 3,046,733,303  | 2,672,090,768 | 3,921,761,663  | 4,012,762,674  | 3,944,859,933  | 2,764,789,777 | 4,008,573,913  | 3,391,368,915 | 2,276,396,375 |
| Mean Target Coverage                      | 115.21        | 130.31         | 116.03        | 165.81         | 166.81         | 165.70         | 90.53         | 132.02         | 110.37        | 78.71         |
| Targeted bases with at least 10 reads (%) | 93.52         | 94.07          | 92.97         | 94.54          | 94.85          | 94.54          | 91.29         | 93.52          | 93.21         | 91.44         |
| Tumor Statistics                          | 05_6986       | 07_16582       | 09_12352      | 11_3089        | 11_3318        | 2000120        | 2000136       | 2000756        | 2453          | 352           |
| Target Regions                            | 334,378       | 334,378        | 334,378       | 334,378        | 334,378        | 334,378        | 334,378       | 334,378        | 334,378       | 334,378       |
| Bases in Target Region                    | 51,756,122    | 51,756,122     | 51,756,122    | 51,756,122     | 51,756,122     | 51,756,122     | 51,756,122    | 51,756,122     | 51,756,122    | 51,756,122    |
| Bases Sequenced (after quality filtering) | 9,186,499,861 | 8,019,094,988  | 6,358,204,803 | 5,630,916,061  | 5,445,291,020  | 6,578,900,123  | 8,041,844,538 | 7,104,490,256  | 7,164,723,012 | 4,696,256,008 |
| Bases Mapped to Genome                    | 5,707,249,125 | 5,058,073,456  | 4,025,007,934 | 3,591,942,200  | 3,561,834,385  | 3,860,399,679  | 4,855,712,132 | 4,544,390,717  | 4,519,426,823 | 3,156,830,439 |
| Bases Mapped to Targeted Region           | 3,545,571,446 | 3,190,273,613  | 2,547,902,472 | 2,291,199,355  | 2,329,756,691  | 2,265,112,674  | 2,931,767,304 | 2,906,705,912  | 2,850,691,741 | 2,121,948,814 |
| Mean Target Coverage                      | 112.97        | 100.27         | 79.93         | 71.34          | 70.75          | 76.44          | 96.23         | 90.06          | 89.70         | 62.70         |
| Targeted bases with at least 10 reads (%) | 92.80         | 91.99          | 90.72         | 90.12          | 90.10          | 90.99          | 92.03         | 91.47          | 91.10         | 89.17         |
| Tumor Statistics                          | 36773720      | 4133           | 4332          | 6112           | 6277           | 80872          | 9534          | 980452         | 990149        | 505           |
| Target Regions                            | 334,378       | 334,378        | 334,378       | 334,378        | 334,378        | 334,378        | 334,378       | 334,378        | 334,378       | 334,378       |
| Bases in Target Region                    | 51,756,122    | 51,756,122     | 51,756,122    | 51,756,122     | 51,756,122     | 51,756,122     | 51,756,122    | 51,756,122     | 51,756,122    | 51,756,122    |
| Bases Sequenced (after quality filtering) | 8,529,504,281 | 5,082,562,113  | 6,242,232,638 | 6,667,294,649  | 5,579,933,659  | 7,790,325,628  | 5,627,592,584 | 7,532,878,476  | 8,201,910,362 | 3,180,130,113 |
| Bases Mapped to Genome                    | 5,234,776,109 | 3,161,729,655  | 3,993,089,362 | 4,067,110,836  | 3,565,039,069  | 4,841,206,986  | 3,473,133,115 | 4,625,033,314  | 5,188,965,414 | 2,340,265,515 |
| Bases Mapped to Targeted Region           | 3,212,582,098 | 1,966,750,770  | 2,354,231,521 | 2,480,876,603  | 2,277,628,595  | 3,008,388,957  | 2,143,395,478 | 2,839,539,203  | 3,282,664,056 | 1,709,535,876 |
| Mean Target Coverage                      | 103.62        | 62.86          | 79.26         | 80.72          | 70.73          | 96.08          | 68.95         | 91.58          | 102.82        | 46.23         |
| Targeted bases with at least 10 reads (%) | 91.93         | 88.89          | 91.18         | 90.90          | 90.38          | 91.28          | 89.83         | 92.03          | 92.45         | 96.37         |
| Tumor Statistics                          | 2012          | 2128           | 6536          | 131169         | 06_2532        | 09_4178        | 09_4615       | 10_5283        | 10_5342       | 11_6165       |
| Target Regions                            | 334,378       | 334,378        | 334,378       | 334,378        | 334,378        | 334,378        | 334,378       | 334,378        | 334,378       | 334,378       |
| Bases in Target Region                    | 51,756,122    | 51,756,122     | 51,756,122    | 51,756,122     | 51,756,122     | 51,756,122     | 51,756,122    | 51,756,122     | 51,756,122    | 51,756,122    |
| Bases Sequenced (after quality filtering) | 2,950,772,729 | 2,944,373,356  | 3,206,207,587 | 3,813,250,029  | 10,866,465,657 | 5,961,109,553  | 6,187,310,783 | 5,230,043,835  | 5,284,886,865 | 6,454,110,813 |
| Bases Mapped to Genome                    | 2,171,093,976 | 2,165,711,923  | 2,359,455,467 | 2,800,878,110  | 6,572,767,610  | 3,780,733,702  | 3,914,787,077 | 3,160,062,218  | 3,356,037,625 | 3,973,233,599 |
| Bases Mapped to Targeted Region           | 1,584,679,322 | 1,580,122,910  | 1,717,827,507 | 2,028,521,967  | 3,975,505,625  | 2,397,775,340  | 2,476,838,806 | 1,909,277,991  | 2,131,087,248 | 2,445,882,871 |
| Mean Target Coverage                      | 42.85         | 42.71          | 46.65         | 55.32          | 130.07         | 74.99          | 77.73         | 62.82          | 66.78         | 78.90         |
| Targeted bases with at least 10 reads (%) | 96.05         | 96.17          | 96.13         | 96.31          | 93.53          | 90.15          | 89.55         | 87.94          | 88.47         | 90.15         |

**Supplementary Table 2. ACC clinical data and MYB-NF1B FISH status**

| Patient ID    | Set | Source      | Age (yrs) | M/F | Stage   | Early vs Advanced | Site           | Perineural invasion | Angiolymphatic invasion | Adjuvant treatment | Pathology              | MYB-NF1B status | Recurrence       | F/U period (mo) | Status      |
|---------------|-----|-------------|-----------|-----|---------|-------------------|----------------|---------------------|-------------------------|--------------------|------------------------|-----------------|------------------|-----------------|-------------|
| 2237          | A   | MSK HN Bank | 46        | M   | T4bN0   | Advanced          | maxilla        | Yes                 | Yes                     | RT                 | solid/high-grade       | Negative        |                  | 1.4             | NED         |
| 1781          | A   | MSK HN Bank | 72        | M   | T4bN0   | Advanced          | maxilla        | Yes                 | No                      | RT                 | cribiform/tubular      | Negative        |                  | 37.3            | NED         |
| 236           | A   | MSK HN Bank | 55        | F   | T4bN0   | Advanced          | maxilla        | Yes                 | Yes                     | RT                 | cribiform/tubular      | Positive        |                  | 50.3            | NED         |
| 2012          | A   | MSK HN Bank | 50        | M   | T4bN0   | Advanced          | maxilla        | No                  | No                      | RT                 | solid/dedifferentiated | Negative        |                  | 25.1            | NED         |
| 410           | A   | MSK HN Bank | 43        | F   | T1N0    | Early             | BOT            | Yes                 | No                      | RT                 | cribiform              | Positive        |                  | 49.1            | NED         |
| 705           | A   | MSK HN Bank | 88        | F   | T4aN0M1 | Advanced          | tongue         | Yes                 | No                      | None               | cribiform              | Positive        | locoregional     | 65.0            | Dead        |
| 2128          | A   | MSK HN Bank | 51        | M   | T3N2C   | Advanced          | BOT            | Yes                 | Yes                     | RT                 | cribiform              | Negative        | lung mets        | 20.8            | Alive w/dz  |
| 380           | A   | MSK HN Bank | 38        | F   | T2N0    | Early             | BOT            | Yes                 | No                      | RT                 | cribiform/tubular      | Negative        |                  | 87.8            | NED         |
| 609           | A   | MSK HN Bank | 49        | F   | T3N2b   | Advanced          | BOT            | Yes                 | No                      | RT                 | cribiform/tubular      | Positive        |                  | 33.7            | NED         |
| 1739          | A   | MSK HN Bank | 67        | M   | T2N0    | Early             | BOT            | Yes                 | Yes                     | RT                 | cribiform/tubular      | Negative        | lung mets        | 41.0            | Alive w/dz  |
| 2020          | A   | MSK HN Bank | 48        | M   | T3N0    | Advanced          | soft palate    | Yes                 | No                      | RT                 | cribiform/tubular      | Positive        |                  | 26.5            | NED         |
| 505           | A   | MSK HN Bank | 63        | F   | T3N0    | Advanced          | trachea        | No                  | No                      | RT                 | cribiform              | Positive        |                  | 76.4            | NED         |
| 479           | A   | MSK HN Bank | 67        | F   | T1N0    | Early             | chin           | Yes                 | No                      | None               | tubular                | MYB+            |                  | 3.8             | NED         |
| 1947          | A   | MSK HN Bank | 51        | M   | T2N0    | Early             | parotid        | Yes                 | No                      | RT                 | >30% solid             | MYB+            |                  | 18.7            | NED         |
| 2238          | A   | MSK HN Bank | 29        | F   | T2N0    | Early             | SMG            | Yes                 | No                      | RT                 | cribiform              | Positive        |                  | 13.3            | NED         |
| 2039          | A   | MSK HN Bank | 64        | M   | T4aN0   | Advanced          | SMG            | Yes                 | No                      | chemoRT            | >50% solid             | Positive        |                  | 11.2            | NED         |
| 1346          | A   | MSK HN Bank | 52        | F   | T4aN0   | Advanced          | parotid        | Yes                 | No                      | RT                 | cribiform              | Positive        | lung mets        | 58.3            | Alive w/dz  |
| 540           | A   | MSK OR      | 74        | F   | T1N0    | Early             | SMG            | Yes                 | No                      | None               | cribiform              | Positive        |                  | 12.3            | NED         |
| 6536          | A   | MSK OR      | 70        | F   | T2N0    | Early             | BOT            | Yes                 | No                      | RT                 | cribiform/tubular      | Negative        |                  | 11.4            | NED         |
| 2282          | A   | MSK OR      | 49        | M   | T2N0    | Early             | hard palate    | Yes                 | No                      | None               | cribiform/tubular      | Positive        |                  | 8.6             | NED         |
| 7097          | A   | MSK OR      | 56        | F   | T2N2B   | Advanced          | BOT            | Yes                 | No                      | RT                 | cribiform/tubular      | Positive        |                  | 10.3            | NED         |
| 7136          | A   | MSK OR      | 58        | F   | T2N0    | Early             | sublingual     | Yes                 | No                      | RT                 | cribiform/tubular      | Negative        |                  | 10.7            | NED         |
| 7441          | A   | MSK OR      | 53        | M   | T4aN0   | Advanced          | hard palate    | Yes                 | No                      | chemoRT            | cribiform/tubular      | Positive        |                  | 10.8            | NED         |
| 111097        | A   | MSK TPS     | 37        | F   | T1N0    | Early             | sublingual     | No                  | No                      | None               | cribiform              | Positive        |                  | 71.3            | NED         |
| 118135        | A   | MSK TPS     | 39        | F   | T3N0    | Advanced          | SMG            | Yes                 | No                      | RT                 | cribiform              | Positive        |                  | 73.5            | NED         |
| 122891        | A   | MSK TPS     | 73        | F   | T3N0    | Advanced          | parotid        | Yes                 | No                      | None               | cribiform              | Positive        | lung mets        | 14.2            | Alive w/dz  |
| 128229        | A   | MSK TPS     | 80        | F   | T1N0    | Early             | SMG            | Yes                 | No                      | None               | cribiform and tubular  | Negative        |                  | 3.8             | NED         |
| 131169        | A   | MSK TPS     | 64        | M   | T1N0    | Early             | SMG            | Yes                 | No                      | RT                 | cribiform              | Negative        | lung mets        | 45.9            | Alive w/dz  |
| 142990        | A   | MSK TPS     | 78        | M   | T2N0    | Early             | maxilla        | Yes                 | Yes                     | chemoRT            | solid/high-grade       | Positive        |                  | 16.7            | NED         |
| 65115         | A   | Proteogenex | 34        | F   | T3N0    | Advanced          | parotid        | N/A                 | N/A                     | N/A                | cribiform              | Negative        |                  | N/A             | Lost to f/u |
| 65103         | A   | Proteogenex | 27        | F   | T3N0    | Advanced          | buccal mucosa  | N/A                 | N/A                     | N/A                | tubular                | Positive        |                  | N/A             | Lost to f/u |
| 352           | B   | MSK HN Bank | 48        | M   | T4bN0   | Advanced          | maxilla        | Yes                 | Yes                     | RT                 | solid                  | Negative        | locoregional     | 43.6            | Dead        |
| 9534          | B   | MSK OR      | 53        | F   | T4aN0M1 | Advanced          | FOM            | Yes                 | No                      | chemoRT            | cribiform              | Negative        | lung mets at dx  | 6.6             | Alive w/dz  |
| 6277          | B   | MSK OR      | 60        | M   | T4aN1   | Advanced          | hard palate    | Yes                 | Yes                     | RT                 | cribiform/tubular      | Positive        |                  | 8.1             | NED         |
| 4332          | B   | MSK OR      | 52        | F   | T4aN0   | Advanced          | buccal muc     | Yes                 | No                      | RT                 | cribiform              | Positive        |                  | 5.9             | NED         |
| 2453          | B   | MSK OR      | 21        | F   | T4aN0   | Advanced          | palate         | Yes                 | No                      | RT                 | cribiform/tubular      | Positive        |                  | 5.4             | NED         |
| 6112          | B   | MSK OR      | 43        | F   | T2N0    | Early             | SMG            | Yes                 | No                      | RT                 | cribiform              | Positive        |                  | 3.7             | NED         |
| 4133          | B   | MSK OR      | 85        | F   | T2N0M1  | Advanced          | FOM            | Yes                 | No                      | chemoRT            | cribiform/tubular      | Negative        |                  | 4.6             | NED         |
| 80872         | B   | MSK OR      | 50        | F   | T3N0    | Advanced          | thyroid        | No                  | Yes                     | RT                 | cribiform              | Negative        |                  | 2.7             | NED         |
| 3492          | B   | MSK OR      | 48        | M   | T2N2BM1 | Advanced          | SMG            | Yes                 | No                      | RT                 | solid                  | Positive        |                  | 2.5             | Alive w/dz  |
| 148632        | B   | MSK TPS     | 74        | F   | T4N0    | Advanced          | lacrimal gland | Yes                 | No                      | RT                 | solid                  | Negative        |                  | 2.8             | NED         |
| 980452        | B   | Singapore   | 51        | M   | T4N0    | Advanced          | FOM            | Yes                 | Yes                     | RT                 | cribiform              | Negative        | locoregional     | 85.2            | Alive w/dz  |
| 990149        | B   | Singapore   | 39        | F   | T2N0    | Early             | FOM            | Yes                 | No                      | None               | cribiform              | Positive        | lung mets        | 86.3            | Alive w/dz  |
| 2000120       | B   | Singapore   | 75        | M   | T2N0    | Early             | sublingual     | Yes                 | No                      | None               | cribiform/tubular      | Negative        | lung mets        | 109.6           | Alive w/dz  |
| 2000136       | B   | Singapore   | 40        | F   | T4N0    | Advanced          | hard palate    | Yes                 | No                      | None               | cribiform              | Positive        |                  | N/A             | lost to f/u |
| 2000756       | B   | Singapore   | 75        | M   | T4N0    | Advanced          | hard palate    | Yes                 | No                      | Yes                | cribiform              | Negative        | lung mets        | 140.0           | Alive w/dz  |
| 36773720      | B   | Singapore   | 83        | M   | T4N0    | Advanced          | buccal mucosa  | Yes                 | No                      | None               | cribiform/tubular      | Positive        |                  | 2.1             | Dead-MI     |
| 671204        | B   | Singapore   | 65        | M   | T4N0    | Advanced          | hard palate    | Yes                 | No                      | Yes                | cribiform              | Positive        | spine mets at dx | 7.1             | Alive w/dz  |
| 05_6986       | B   | Amsterdam   | 75        | M   | T2N0    | Early             | parotid        | no                  | N/A                     | N/A                | cribiform/tubular      | Positive        | lung mets        | 52.3            | Dead        |
| 07_16582      | B   | Amsterdam   | 67        | F   | T1N0    | Early             | parotid        | yes                 | N/A                     | N/A                | cribiform              | Negative        |                  | 46.5            | NED         |
| 09_12352      | B   | Amsterdam   | 72        | F   | T1N0M1  | Advanced          | SMG            | yes                 | N/A                     | N/A                | cribiform/tubular      | Negative        | bone mets        | 6.0             | Dead        |
| 11_3089       | B   | Amsterdam   | 42        | F   | T2N0    | Early             | trachea        | yes                 | N/A                     | N/A                | cribiform/tubular      | Negative        |                  | 11.2            | NED         |
| 11_3318       | B   | Amsterdam   | 58        | F   | T2N0    | Early             | palate         | yes                 | N/A                     | N/A                | cribiform/tubular      | Positive        |                  | 11.0            | NED         |
| 11_17815      | B   | Amsterdam   | 69        | M   | T3N0    | Advanced          | sinonasal      | no                  | N/A                     | N/A                | cribiform/tubular      | Negative        |                  | 1.1             | NED         |
| 06_2532       | B   | Pittsburgh  | 83        | F   | T4BN0   | Advanced          | RMT            | Yes                 | N/A                     | RT                 | tubular                | Positive        | lung mets        | 62.0            | Dead-Other  |
| 09_4615       | B   | Pittsburgh  | 53        | M   | T4AN0   | Advanced          | parotid        | Yes                 | N/A                     | RT                 | cribiform/tubular      | Positive        |                  | 35.8            | NED         |
| 10_5283       | B   | Pittsburgh  | 80        | M   | T2N0    | Early             | SMG            | Yes                 | N/A                     | RT                 | cribiform              | Negative        |                  | 22.4            | NED         |
| 10_5342       | B   | Pittsburgh  | 31        | F   | T3N2B   | Advanced          | parotid        | Yes                 | N/A                     | RT                 | cribiform              | Positive        | lung mets        | 24.7            | Alive w/dz  |
| 11_6165       | B   | Pittsburgh  | 48        | F   | T4BN0   | Advanced          | parotid        | No                  | N/A                     | RT                 | tubular                | Negative        |                  | 11.0            | NED         |
| 09_4178       | B   | Pittsburgh  | 62        | M   | T2N2B   | Advanced          | BOT            | Yes                 | N/A                     | chemoRT            | cribiform/tubular      | Negative        |                  | 38.1            | NED         |
| <b>Median</b> |     |             | <b>54</b> |     |         |                   |                |                     |                         |                    |                        |                 |                  | <b>16.7</b>     |             |

**Supplementary Table 3. Validated ACC nonsynonymous mutations**

| Gene     | Sample   | Entrez Gene ID | Type        | Nucleotide (genomic)          | Nucleotide (cDNA) | Amino acid (protein) | Refseq mRNA ID | Polyphen 2 Class | MutationAssessor Class |
|----------|----------|----------------|-------------|-------------------------------|-------------------|----------------------|----------------|------------------|------------------------|
| ABCA7    | 671204   | 10347          | Splice Site | g.chr19:1046406G>A            | c.1622_splice     | p.V541_splice        | NM_019112      |                  |                        |
| ABCA9    | 6536     | 10350          | Missense    | g.chr17:67016724A>G           | c.2405T>C         | p.I802T              | NM_080283      | neutral          | neutral                |
| ACADL    | 3492     | 33             | Missense    | g.chr2:211085501G>A           | c.103C>T          | p.R35C               | NM_001608      | deleterious      | low                    |
| ACD      | 142990   | 65057          | Missense    | g.chr16:67691738G>A           | c.1483C>T         | p.R495C              | NM_001082486   | deleterious      | low                    |
| ACOX2    | 1781     | 8309           | Splice Site | g.chr3:58510332C>T            | c.1347G>A         | p.R449R              | NM_003500      |                  |                        |
| ACTB     | 671204   | 60             | Missense    | g.chr7:5567474T>C             | c.1033A>G         | p.I345V              | NM_001101      | neutral          | medium                 |
| ACTB     | 10_5283  | 60             | Missense    | g.chr7:5568871C>T             | c.284G>A          | p.R95H               | NM_001101      | deleterious      | medium                 |
| ACTG2    | 2000756  | 72             | Indel       | g.chr2:74141809_74141810delGA | c.616_617delGA    | p.E206fs             | NM_001615      |                  |                        |
| ACVR1B   | 2237     | 91             | Missense    | g.chr12:52380724G>A           | c.1259G>A         | p.G420E              | NM_004302      | deleterious      | medium                 |
| ADAM2    | 671204   | 2515           | Missense    | g.chr8:39624426A>G            | c.1448T>C         | p.I483T              | NM_001464      | neutral          | low                    |
| ADAM2    | 7097     | 2515           | Missense    | g.chr8:39645667G>A            | c.746C>T          | p.T249I              | NM_001464      | neutral          | neutral                |
| ADAM32   | 6112     | 203102         | Missense    | g.chr8:39103660G>T            | c.1877G>T         | p.C626F              | NM_145004      | deleterious      | low                    |
| ADAMTS16 | 705      | 170690         | Missense    | g.chr5:5146307G>A             | c.240G>A          | p.M80I               | NM_139056      | deleterious      | neutral                |
| ADAMTSL2 | 11_6165  | 9719           | Missense    | g.chr9:136420739C>T           | c.1336C>T         | p.H446Y              | NM_001145320   | neutral          | neutral                |
| ADCY10   | 2039     | 55811          | Missense    | g.chr1:167847744A>G           | c.1346T>C         | p.V449A              | NM_018417      | neutral          | low                    |
| ADNP2    | 131169   | 22850          | Missense    | g.chr18:77894928G>T           | c.1632G>T         | p.Q544H              | NM_014913      | deleterious      | medium                 |
| ADSS     | 09_4178  | 159            | Missense    | g.chr1:244582154T>C           | c.853A>G          | p.M285V              | NM_001126      | neutral          | neutral                |
| AEBP1    | 09_4615  | 165            | Missense    | g.chr7:44148519C>T            | c.962C>T          | p.P321L              | NM_001129      | deleterious      | low                    |
| AFF2     | 410      | 2334           | Missense    | g.chrX:148037237G>T           | c.1662G>T         | p.E554D              | NM_002025      | deleterious      | low                    |
| AFF2     | 11_6165  | 2334           | Missense    | g.chrX:147743437A>T           | c.189A>T          | p.K63N               | NM_002025      | deleterious      | low                    |
| AGBL4    | 11_6165  | 84871          | Missense    | g.chr1:49056576C>T            | c.1033G>A         | p.D345N              | NM_032785      | neutral          | low                    |
| AGPAT4   | 540      | 56895          | Missense    | g.chr6:161574393T>G           | c.649A>C          | p.S217R              | NM_020133      | neutral          | low                    |
| AHNAK    | 148632   | 79026          | Missense    | g.chr11:62293274T>G           | c.8615A>C         | p.K2872T             | NM_001620      | deleterious      | medium                 |
| AICDA    | 7097     | 57379          | Missense    | g.chr12:8758078C>T            | c.160G>A          | p.G54S               | NM_020661      | deleterious      | medium                 |
| AIFM3    | 10_5283  | 150209         | Missense    | g.chr22:21333921G>C           | c.1582G>C         | p.G528R              | NM_144704      | deleterious      | low                    |
| ALG10B   | 2000756  | 144245         | Missense    | g.chr12:38714144T>A           | c.551T>A          | p.M184K              | NM_001013620   | deleterious      | medium                 |
| ALOXE3   | 705      | 59344          | Missense    | g.chr17:8015480G>A            | c.715C>T          | p.R239C              | NM_021628      | neutral          | low                    |
| ALS2CR11 | 1947     | 151254         | Splice Site | chr2:202430450insA            | c.977+2T>-        |                      | NM_001168221   |                  |                        |
| ALS2CR12 | 65115    | 130540         | Splice Site | g.chr2:202207155C>A           | c.463_splice      | p.L155_splice        | NM_139163      |                  |                        |
| ANGPT1   | 09_4615  | 284            | Missense    | g.chr8:108296914A>G           | c.1201T>C         | p.Y401H              | NM_001146      | deleterious      | high                   |
| ANGPT2   | 2012     | 285            | Nonsense    | g.chr8:6389855G>A             | c.442C>T          | p.Q148*              | NM_001147      |                  |                        |
| ANK1     | 2237     | 286            | Missense    | g.chr8:41577348G>C            | c.938C>G          | p.A313G              | NM_020476      | neutral          | medium                 |
| ANKRD12  | 2000120  | 23253          | Missense    | g.chr18:9254521C>G            | c.1256C>G         | p.S419C              | NM_015208      | deleterious      | medium                 |
| ANKRD17  | 2000756  | 26057          | Missense    | g.chr4:73944488T>C            | c.7279A>G         | p.I2427V             | NM_032217      | neutral          | low                    |
| ANKS4B   | 609      | 257629         | Missense    | g.chr16:21261927C>T           | c.1040C>T         | p.P347L              | NM_145865      | deleterious      | medium                 |
| APC      | 3492     | 324            | Nonsense    | g.chr5:112176863C>T           | c.5572C>T         | p.R1858*             | NM_001127511   |                  |                        |
| APOBEC3D | 2237     | 140564         | Missense    | g.chr22:39425492G>T           | c.730G>T          | p.V244F              | NM_152426      | deleterious      | low                    |
| APPPB2   | 09_4615  | 10513          | Missense    | g.chr17:58571881C>T           | c.325G>A          | p.A109T              | NM_006380      | neutral          | low                    |
| ARAP2    | 2237     | 116984         | Missense    | g.chr4:36230225G>A            | c.884C>T          | p.S295L              | NM_015230      | neutral          | low                    |
| ARHGAP10 | 11_17815 | 79658          | Missense    | g.chr4:148778744A>G           | c.425A>G          | p.Y142C              | NM_024605      | deleterious      | low                    |
| ARHGAP44 | 05_6986  | 9912           | Nonsense    | g.chr17:12852538G>T           | c.943G>T          | p.E315*              | NM_014859      |                  |                        |
| ARHGEF15 | 671204   | 22899          | Indel       | g.chr17:8216328delC           | c.690delC         | p.G230fs             | NM_173728      |                  |                        |
| ARHGEF40 | 3492     | 55701          | Missense    | g.chr14:21555235G>A           | c.4214G>A         | p.R1405Q             | NM_018071      | deleterious      | neutral                |
| ARHGEF5  | 10_5283  | 7984           | Missense    | g.chr7:144077106G>A           | c.4751G>A         | p.R1584Q             | NM_005435      | deleterious      | low                    |
| ARID1A   | 07_16582 | 8289           | Indel       | g.chr1:27105930_27105931insG  | c.5541_5542insG   | p.G1847fs            | NM_006015      |                  |                        |
| ARID4B   | 1739     | 51742          | Indel       | g.chr1:235424022insACT        | c.52_53insAGT     | p.A18delinsSA        | NM_001206794   |                  |                        |
| ARID5B   | 148632   | 84159          | Nonsense    | g.chr10:63850714G>T           | c.1492G>T         | p.E498*              | NM_032199      |                  |                        |
| ARNT2    | 9534     | 9915           | Splice Site | g.chr15:80866561G>A           | c.1389G>A         | p.Q463Q              | NM_014862      |                  |                        |
| ARRDC3   | 479      | 57561          | Missense    | g.chr5:90669514G>C            | c.1175C>G         | p.P392R              | NM_020801      | deleterious      | medium                 |
| ASAP2    | 7441     | 8853           | Missense    | g.chr2:9496405A>G             | c.1258A>G         | p.T420A              | NM_003887      | neutral          | medium                 |
| ASF1B    | 9534     | 55723          | Missense    | g.chr19:14231281T>C           | c.599A>G          | p.D200G              | NM_018154      | deleterious      | low                    |
| ASTN1    | 9534     | 460            | Missense    | g.chr11:76833574C>T           | c.3731G>A         | p.R1244Q             | NM_004319      | neutral          | low                    |
| ASXL3    | 7441     | 80816          | Missense    | g.chr18:31319128G>T           | c.1760G>T         | p.G587V              | NM_030632      | deleterious      | low                    |
| ATCAY    | 6536     | 85300          | Splice Site | g.chr19:3907733C>T            | c.360C>T          | p.D120D              | NM_033064      |                  |                        |
| ATF7IP   | 36773720 | 55729          | Missense    | g.chr12:14577937G>A           | c.1088G>A         | p.R363Q              | NM_018179      | neutral          | neutral                |
| ATM      | 65115    | 472            | Missense    | g.chr11:108188116G>A          | c.6215G>A         | p.G2072E             | NM_000051      | deleterious      | high                   |
| ATM      | 65115    | 472            | Missense    | g.chr11:108196143C>T          | c.6679C>T         | p.R2227C             | NM_000051      | deleterious      | medium                 |
| ATRX     | 11_6165  | 546            | Missense    | g.chrX:76937140G>A            | c.3608C>T         | p.S1203L             | NM_000489      | deleterious      | neutral                |
| ATXN2    | 410      | 6311           | Missense    | g.chr12:111951163C>T          | c.2036G>A         | p.G679E              | NM_002973      | deleterious      | low                    |
| ATXN3L   | 07_16582 | 92552          | Missense    | g.chrX:13337924C>T            | c.130G>A          | p.E44K               | NM_001135995   | deleterious      | medium                 |
| AXDND1   | 148632   | 126859         | Missense    | g.chr1:179437776C>T           | c.1997C>T         | p.S666L              | NM_144696      | neutral          | neutral                |
| AXIN1    | 148632   | 8312           | Nonsense    | g.chr16:396299C>A             | c.727G>T          | p.E243*              | NM_003502      |                  |                        |
| B3GNT2   | 05_6986  | 10678          | Missense    | g.chr2:62449369G>T            | c.144G>T          | p.R5L                | NM_006577      | deleterious      | medium                 |
| BAI1     | 122891   | 575            | Missense    | g.chr8:143602248G>A           | c.2986G>A         | p.A996T              | NM_001702      | neutral          | low                    |
| BAIAP3   | 07_16582 | 8938           | Missense    | g.chr16:1391848C>A            | c.862C>A          | p.Q288K              | NM_003933      | deleterious      | low                    |
| BAP1     | 1346     | 8314           | Missense    | g.chr3:52439805C>G            | c.907G>C          | p.A303P              | NM_004656      | neutral          | low                    |
| BBS1     | 128229   | 582            | Missense    | g.chr11:66283195T>G           | c.511T>G          | p.S171A              | NM_024649      | deleterious      | medium                 |
| BCOR     | 705      | 54880          | Nonsense    | g.chrX:39932914G>T            | c.1685C>A         | p.S562*              | NM_001123385   |                  |                        |
| BCORL1   | 980452   | 63035          | Missense    | g.chrX:129149009T>C           | c.2261T>C         | p.I754T              | NM_021946      | deleterious      | medium                 |
| BEST3    | 06_2532  | 144453         | Missense    | g.chr12:70049136G>A           | c.1558C>T         | p.H520Y              | NM_032735      | neutral          | neutral                |
| BICD1    | 4133     | 636            | Missense    | g.chr12:32480497C>T           | c.1108C>T         | p.R370W              | NM_001714      | deleterious      | medium                 |
| BOLL     | 11_6165  | 66037          | Missense    | g.chr2:198641827C>T           | c.232G>A          | p.V78I               | NM_033030      | neutral          | low                    |
| BRCA1    | 2237     | 672            | Missense    | g.chr17:41242984G>C           | c.4162C>G         | p.Q1388E             | NM_007294      | deleterious      | medium                 |
| BRCA1    | 2237     | 672            | Missense    | g.chr17:41243523G>A           | c.4025C>T         | p.S1342L             | NM_007294      | neutral          | medium                 |
| BRD1     | 671204   | 23774          | Missense    | g.chr22:50216803T>C           | c.1163A>G         | p.H388R              | NM_014577      | deleterious      | high                   |
| BRD3     | 09_4615  | 8019           | Missense    | g.chr9:136915621C>T           | c.589G>A          | p.A197T              | NM_007371      | neutral          | low                    |



|           |          |        |             |                                |               |               |              |             |         |
|-----------|----------|--------|-------------|--------------------------------|---------------|---------------|--------------|-------------|---------|
| BRI3      | 2237     | 25798  | Missense    | g.chr7:97920462C>G             | c.285C>G      | p.I95M        | NM_015379    | deleterious | medium  |
| BTA1      | 2238     | 9044   | Missense    | g.chr10:9376868T>C             | c.3896T>C     | p.L1299S      | NM_003972    | deleterious | high    |
| BTN3A2    | 11_17815 | 11118  | Splice Site | g.chr6:26370832G>T             | c.715_splice  | p.D239_splice | NM_007047    |             |         |
| BUB1B     | 671204   | 701    | Missense    | g.chr15:40462300G>T            | c.217G>T      | p.D73Y        | NM_001211    | deleterious | high    |
| BUB1B     | 11_17815 | 701    | Missense    | g.chr15:40510712T>C            | c.2906T>C     | p.L969P       | NM_001211    | deleterious | medium  |
| BZRAP1    | 6277     | 9256   | Missense    | g.chr17:56384224C>T            | c.5089G>A     | p.A1697T      | NM_004758    | neutral     | low     |
| C10orf129 | 148632   | 142827 | Missense    | g.chr10:96954367T>A            | c.125T>A      | p.V42D        | NM_207321    | neutral     | neutral |
| C14orf43  | 2039     | 91748  | Splice Site | g.chr14:74193532C>T            | c.2305_splice | p.V769_splice | NM_194278    |             |         |
| C16orf11  | 148632   | 146325 | Indel       | g.chr16:613726delG             | c.432delG     | p.V144fs      | NM_145270    |             |         |
| C18orf63  | 11_17815 | 644041 | Missense    | g.chr18:72021317T>A            | c.990T>A      | p.D330E       |              |             | low     |
| C19orf24  | 131169   | 55009  | Missense    | g.chr19:1275594G>C             | c.46G>C       | p.A16P        | NM_017914    | none        | neutral |
| C19orf24  | 131169   | 55009  | Missense    | g.chr19:1275595C>T             | c.47C>T       | p.A16V        | NM_017914    | none        | neutral |
| C19orf29  | 2237     | 58509  | Missense    | g.chr19:3612326C>G             | c.1872G>C     | p.E624D       | NM_001080543 |             | medium  |
| C19orf44  | 3492     | 84167  | Missense    | g.chr19:16623863G>A            | c.1678G>A     | p.A560T       | NM_032207    | neutral     | medium  |
| C1orf141  | 540      | 400757 | Splice Site | g.chr1:67592939T>A             |               |               | NM_001013674 |             |         |
| C1orf173  | 2000120  | 127254 | Missense    | g.chr1:75038462C>T             | c.2932G>A     | p.E978K       | NM_001002912 | deleterious | neutral |
| C1orf50   | 10_5283  | 79078  | Missense    | g.chr1:43241004T>G             | c.539T>G      | p.L180R       | NM_024097    | deleterious | medium  |
| C2orf11   | 7097     | 54994  | Missense    | g.chr20:61574929G>A            | c.398G>A      | p.G133D       | NM_017896    | deleterious | medium  |
| C6orf170  | 36773720 | 221322 | Missense    | g.chr6:121638817A>G            | c.319T>C      | p.Y107H       | NM_152730    | deleterious | medium  |
| C6orf222  | 142990   | 389384 | Missense    | g.chr6:36291252C>G             | c.1289G>C     | p.R430T       | NM_001010903 | neutral     | neutral |
| C6orf222  | 142990   | 389384 | Missense    | g.chr6:36291177C>G             | c.1364G>C     | p.R455T       | NM_001010903 | deleterious | low     |
| C6orf62   | 7441     | 81688  | Missense    | g.chr6:24714569C>A             | c.406G>T      | p.D136Y       | NM_030939    | neutral     | neutral |
| C8orf33   | 10_5342  | 65265  | Missense    | g.chr8:146278780G>T            | c.501G>T      | p.R167S       | NM_023080    | deleterious | medium  |
| CA1       | 07_16582 | 759    | Indel       | g.chr8:86245760_86245761insA   | c.443_444insT | p.L148fs      | NM_001738    |             |         |
| CA14      | 2000756  | 23632  | Missense    | g.chr1:150235756T>C            | c.779T>C      | p.V260A       | NM_012113    | neutral     | medium  |
| CACNA1C   | 122891   | 775    | Missense    | g.chr12:2622126A>G             | c.1366A>G     | p.M456V       | NM_199460    | neutral     | neutral |
| CADM2     | 2000756  | 253559 | Missense    | g.chr3:86114775C>G             | c.1084C>G     | p.Q362E       | NM_153184    | neutral     | low     |
| CALCOCO1  | 6536     | 57658  | Missense    | g.chr12:54115820C>G            | c.598G>C      | p.E200Q       | NM_020898    | neutral     | low     |
| CALCOCO1  | 6536     | 57658  | Missense    | g.chr12:54115261C>G            | c.748G>C      | p.E250Q       | NM_020898    | deleterious | medium  |
| CALM2     | 2020     | 805    | Missense    | g.chr2:47389754T>C             | c.82A>G       | p.I28V        | NM_001743    | deleterious | low     |
| CAMK4     | 06_2532  | 814    | Missense    | g.chr5:110818621C>T            | c.967C>T      | p.R323W       | NM_001744    | deleterious | medium  |
| CAPN6     | 07_16582 | 827    | Missense    | g.chrX:110489945C>T            | c.1786G>A     | p.V596I       | NM_014289    | neutral     | medium  |
| CASZ1     | 2000756  | 54897  | Missense    | g.chr1:10714034G>A             | c.2080C>T     | p.R694C       | NM_001079843 | deleterious | medium  |
| CBLN1     | 1947     | 869    | Missense    | g.chr16:49314872A>T            | c.346T>A      | p.F116I       | NM_004352    | deleterious | medium  |
| CCDC111   | 671204   | 201973 | Missense    | g.chr4:185615719A>G            | c.1469A>G     | p.N490S       | NM_152683    | neutral     | neutral |
| CCDC14    | 980452   | 64770  | Missense    | g.chr3:123633973C>T            | c.2515G>A     | p.E839K       | NM_022757    | deleterious | low     |
| CCDC141   | 11_6165  | 285025 | Missense    | g.chr2:179736246G>A            | c.388C>T      | p.L130F       | NM_173648    | deleterious | neutral |
| CCDC7     | 07_16582 | 221016 | Missense    | g.chr10:32833205A>G            | c.1110A>G     | p.I370M       | NM_145023    | neutral     | low     |
| CD1D      | 2453     | 912    | Missense    | g.chr1:158152715C>T            | c.655C>T      | p.R219C       | NM_001766    | neutral     | medium  |
| CD22      | 1781     | 933    | Missense    | g.chr19:35829077C>T            | c.992C>T      | p.P331L       | NM_001771    | deleterious | medium  |
| CD226     | 6112     | 10666  | Missense    | g.chr18:67562961C>T            | c.703G>A      | p.V235M       | NM_006566    | deleterious | medium  |
| CD25B     | 06_2532  | 994    | Missense    | g.chr20:3783581G>A             | c.1219G>A     | p.G407R       | NM_021873    | deleterious | medium  |
| CDON      | 671204   | 50937  | Missense    | g.chr11:125848220C>T           | c.3335G>A     | p.R1112Q      | NM_016952    | deleterious | neutral |
| CECR2     | 11_6165  | 27443  | Missense    | g.chr22:18028762T>G            | c.3719T>G     | p.M1240R      | NM_031413    | deleterious | low     |
| CELSR3    | 142990   | 1951   | Missense    | g.chr3:48682531C>T             | c.7909G>A     | p.V2637M      | NM_001407    | deleterious | medium  |
| CEP120    | 540      | 153241 | Missense    | g.chr5:122720708G>C            | c.1700C>G     | p.S567C       | NM_153223    | neutral     | low     |
| CEP135    | 1781     | 9662   | Indel       | g.chr4:56831978delAAA          | c.997_999del  | p.333_333del  | NM_025009    |             |         |
| CEP97     | 05_6986  | 79598  | Indel       | g.chr3:101451414_101451415insA | c.644_645insA | p.P215fs      | NM_024548    |             |         |
| CHD9      | 2000120  | 80205  | Missense    | g.chr16:53281369A>G            | c.3619A>G     | p.M1207V      | NM_025134    | deleterious | high    |
| CHIL3L    | 148632   | 1116   | Missense    | g.chr1:203154370C>G            | c.199G>C      | p.D67H        | NM_001276    |             | low     |
| CHPF2     | 2000120  | 54480  | Missense    | g.chr7:150931315T>G            | c.218T>G      | p.V73G        | NM_001915    | deleterious | medium  |
| CHRM1     | 3492     | 1128   | Missense    | g.chr11:62677267G>C            | c.1306C>G     | p.R436G       | NM_000738    | deleterious | low     |
| CHRNA4    | 6112     | 1137   | Missense    | g.chr20:61981129G>C            | c.1634C>G     | p.T545R       | NM_000744    | deleterious | low     |
| CHRN8     | 1947     | 1140   | Splice Site | g.chr17:7350821delG            | c.462-1G>     |               | NM_000747    |             |         |
| CHRN8     | 2000120  | 1144   | Missense    | g.chr2:233393633C>A            | c.571C>A      | p.R191S       | NM_000751    | deleterious | medium  |
| CHST5     | 142990   | 23563  | Missense    | g.chr16:75563606G>A            | c.677C>T      | p.P226L       | NM_024533    | deleterious | high    |
| CHST5     | 6536     | 23563  | Nonsense    | g.chr16:75563521C>T            | c.762G>A      | p.V254*       | NM_024533    |             |         |
| CLCA2     | 148632   | 9635   | Missense    | g.chr1:86896578G>A             | c.509G>A      | p.R170H       | NM_006536    | deleterious | medium  |
| CNDP2     | 65115    | 55748  | Missense    | g.chr18:72179722G>A            | c.697G>A      | p.G233R       | NM_018235    | deleterious | high    |
| CNTN6     | 65115    | 27255  | Missense    | g.chr3:1415377A>T              | c.1876A>T     | p.S626C       | NM_014461    | deleterious | high    |
| CNTNAP5   | 1781     | 129684 | Splice Site | g.chr2:124999971G>T            | c.381_splice  | p.W127_splice | NM_130773    |             |         |
| COL15A1   | 2237     | 1306   | Missense    | g.chr9:101802807C>T            | c.2480C>T     | p.P827L       | NM_001855    | deleterious | low     |
| COL6A6    | 05_6986  | 131873 | Nonsense    | g.chr3:130285860C>T            | c.1597C>T     | p.R533*       | NM_001102608 |             |         |
| COL7A1    | 36773720 | 1294   | Missense    | g.chr3:48611724G>T             | c.6472C>A     | p.R2158S      | NM_000094    | neutral     | medium  |
| CORO6     | 7441     | 84940  | Missense    | g.chr17:27944012C>T            | c.802G>A      | p.G268R       | NM_032854    | deleterious | high    |
| CPT1B     | 122891   | 1375   | Missense    | g.chr22:51015399C>T            | c.346G>A      | p.V116I       | NM_001145137 | neutral     | low     |
| CREBBP    | 3492     | 1387   | Missense    | g.chr16:3788596A>T             | c.4358T>A     | p.I1453N      | NM_004380    | none        | high    |
| CREBBP    | 1781     | 1387   | Missense    | g.chr16:3788618G>A             | c.4336C>T     | p.R1446C      | NM_004380    | none        | high    |
| CREBBP    | 671204   | 1387   | Missense    | g.chr16:3843416G>C             | c.1187C>G     | p.T396R       | NM_004380    | deleterious | medium  |
| CREBBP    | 2000756  | 1387   | Missense    | g.chr16:3786796C>G             | c.4415G>C     | p.W1472S      | NM_004380    | none        | high    |
| CRHR1     | 6536     | 1394   | Missense    | g.chr17:43911172G>T            | c.1109G>T     | p.R370L       | NM_001145146 | neutral     | low     |
| CRHR2     | 06_2532  | 1395   | Missense    | g.chr7:30704795C>T             | c.434G>A      | p.R145H       | NM_001883    | deleterious | low     |
| CSMD1     | 671204   | 64478  | Missense    | g.chr8:4494868C>T              | c.298G>A      | p.V100M       | NM_033223    | neutral     | neutral |
| CSMD3     | 1947     | 114788 | Missense    | g.chr8:113988270A>G            | c.1138T>C     | p.S380P       | NM_198123    | neutral     | low     |
| CTAG2     | 65103    | 30848  | Missense    | g.chrX:153881555C>T            | c.235G>A      | p.G79R        | NM_020994    | deleterious | neutral |
| CTCF      | 2000756  | 10664  | Missense    | g.chr16:67670734A>G            | c.1979A>G     | p.N660S       | NM_006565    | neutral     | low     |
| CTN8B1    | 1947     | 1499   | Missense    | g.chr3:41278106G>T             | c.1982G>T     | p.R661L       | NM_001904    |             | medium  |
| CTNND2    | 06_2532  | 1501   | Missense    | g.chr5:11732346C>T             | c.76G>A       | p.E26K        | NM_001332    | neutral     | neutral |
| CTSL1     | 11_3089  | 1514   | Missense    | g.chr9:90344547C>A             | c.681C>A      | p.D227E       | NM_001912    | neutral     | low     |
| CUL3      | 6536     | 8452   | Missense    | g.chr2:225376290G>T            | c.664C>A      | p.Q222K       | NM_003590    | neutral     | low     |
| CUX1      | 05_6986  | 1523   | Missense    | g.chr7:101833099G>A            | c.1024G>A     | p.E342K       | NM_181552    | deleterious | low     |

|          |          |        |             |                               |                  |                |              |             |         |
|----------|----------|--------|-------------|-------------------------------|------------------|----------------|--------------|-------------|---------|
| Cxorf30  | 7136     | 645090 | Missense    | g.chrX:36368172G>A            | c.961G>A         | p.E321K        | NM_001098843 | neutral     | neutral |
| Cxorf36  | 2128     | 79742  | Missense    | g.chrX:4505992C>T             | c.80G>A          | p.S27N         | NM_176819    | deleterious | low     |
| CYP2C19  | 705      | 1557   | Missense    | g.chr10:96602752G>A           | c.1120G>A        | p.V374I        | NM_000769    | neutral     | neutral |
| CYP3A43  | 09_4615  | 64816  | Missense    | g.chr7:99457591T>C            | c.1004T>C        | p.I335T        | NM_057095    | deleterious | high    |
| DAGLB    | 2000756  | 221955 | Missense    | g.chr7:6449596T>C             | c.1891A>G        | p.I631V        | NM_139179    | neutral     | low     |
| DCAF12L2 | 2000120  | 340578 | Missense    | g.chrX:12598898C>T            | c.1010G>A        | p.R337H        | NM_001013628 | deleterious | low     |
| DCLRE1A  | 2237     | 9937   | Missense    | g.chr10:115609522C>G          | c.1342G>C        | p.E448Q        | NM_014881    | neutral     | neutral |
| DCLRE1A  | 2237     | 9937   | Missense    | g.chr10:115609519C>T          | c.1345G>A        | p.E449K        | NM_014881    | deleterious | low     |
| DDX12    | 65115    | 440081 | Missense    | g.chr12:9578105G>A            | c.1724C>T        | p.T575M        | NM_004400    |             |         |
| DDX42    | 705      | 11325  | Missense    | g.chr17:61885144A>G           | c.907A>G         | p.K303E        | NM_007372    | deleterious | high    |
| DDX60L   | 2237     | 91351  | Missense    | g.chr4:169348371C>T           | c.1780G>A        | p.E594K        | NM_001012967 | deleterious | low     |
| DEPDC5   | 05_6986  | 9681   | Missense    | g.chr22:32270318C>T           | c.3530C>T        | p.A1177V       | NM_014662    | deleterious | medium  |
| DERL1    | 148632   | 79139  | Missense    | g.chr8:124042917C>A           | c.193G>T         | p.G65C         | NM_024295    | deleterious | high    |
| DHODH    | 236      | 1723   | Missense    | g.chr16:72056354A>C           | c.799A>C         | p.I267L        | NM_001361    | deleterious | medium  |
| DHX37    | 11_3318  | 57647  | Missense    | g.chr12:125437084C>T          | c.2728G>A        | p.V910M        | NM_032656    | neutral     | low     |
| DHX9     | 09_4178  | 1660   | Nonsense    | g.chr1:182827275T>A           | c.710T>A         | p.L237*        | NM_001357    |             |         |
| DIEXF    | 4133     | 27042  | Missense    | g.chr1:210004331G>A           | c.331G>A         | p.G111S        | NM_014388    | neutral     | low     |
| DIS3     | 2000756  | 22894  | Missense    | g.chr13:73346338C>T           | c.1462G>A        | p.D488N        | NM_014953    | deleterious | high    |
| DKK4     | 2039     | 27121  | Missense    | g.chr8:42232330C>G            | c.364G>C         | p.E122Q        | NM_014420    | deleterious | low     |
| DNAH11   | 111097   | 8701   | Missense    | g.chr7:21882352T>C            | c.10903T>C       | p.L3635L       | NM_003777    |             |         |
| DNAH11   | 2020     | 8701   | Missense    | g.chr7:21779253C>T            | c.7897C>T        | p.P2633S       | NM_003777    | deleterious |         |
| DNAH5    | 7136     | 1767   | Missense    | g.chr5:13719002C>A            | c.12488G>T       | p.R4163I       | NM_001369    | deleterious | high    |
| DNAH9    | 6536     | 1770   | Missense    | g.chr17:11725366G>A           | c.8837G>A        | p.R2946Q       | NM_001372    | neutral     | medium  |
| DNAJC12  | 10_5283  | 56521  | Missense    | g.chr10:69565535C>A           | c.308G>T         | p.W103L        | NM_021800    | deleterious | medium  |
| DOCK11   | 07_16582 | 139818 | Missense    | g.chrX:117739268G>A           | c.2630G>A        | p.R877Q        | NM_144658    | neutral     | low     |
| DOCK8    | 128229   | 81704  | Missense    | g.chr9:439318G>C              | c.5153G>C        | p.C1718S       | NM_203447    | deleterious | medium  |
| DTX4     | 2238     | 23220  | Missense    | g.chr11:58940272A>T           | c.204A>T         | p.Q68H         | NM_015177    | deleterious | medium  |
| DUOX1    | 11_3089  | 53905  | Missense    | g.chr15:45434251T>C           | c.1763T>C        | p.F588S        | NM_017434    | deleterious | medium  |
| DYNC1L11 | 09_4615  | 51143  | Missense    | g.chr3:32568386A>C            | c.1477T>G        | p.L493V        | NM_016141    | deleterious | medium  |
| DYSF     | 2237     | 8291   | Missense    | g.chr2:71681189G>T            | c.61G>T          | p.D21Y         | NM_003494    | deleterious | medium  |
| DYSF     | 11_6165  | 8291   | Missense    | g.chr2:71740999G>T            | c.611G>T         | p.R204L        | NM_003494    | neutral     | medium  |
| ECEL1    | 410      | 9427   | Splice Site | g.chr2:233349690C>T           | c.966_splice     | p.N322_splice  | NM_004826    |             |         |
| EDC4     | 2000120  | 23644  | Missense    | g.chr16:67912962A>G           | c.1390A>G        | p.I464V        | NM_014329    | neutral     | low     |
| EGF      | 11_17815 | 1950   | Missense    | g.chr4:110914451G>C           | c.2783G>C        | p.S928T        | NM_001963    | neutral     | neutral |
| EHF      | 3492     | 26298  | Missense    | g.chr11:34680407C>T           | c.832C>T         | p.R278C        | NM_012153    | deleterious | medium  |
| EIF3B    | 4133     | 8662   | Indel       | g.chr7:2412384_2412385delTG   | c.1764_1765delTG | p.S588fs       | NM_003751    |             |         |
| EIF4G1   | 118135   | 1981   | Missense    | g.chr3:184039487C>T           | c.1115C>T        | p.P372L        | NM_198241    | deleterious | low     |
| ELOVL3   | 09_4178  | 83401  | Missense    | g.chr10:103987439A>G          | c.158A>G         | p.N53S         | NM_152310    | neutral     | low     |
| ENC1     | 36773720 | 8507   | Missense    | g.chr5:73932240T>A            | c.71A>T          | p.H24L         | NM_003633    | deleterious | medium  |
| ENC1     | 2000756  | 8507   | Indel       | g.chr5:73931844_73931845insAC | c.466_467insGT   | p.S156fs       | NM_003633    |             |         |
| ENOX1    | 80872    | 55068  | Missense    | g.chr13:43930154G>A           | c.724C>T         | p.R242W        | NM_001127615 | deleterious | medium  |
| ENPEP    | 148632   | 2028   | Missense    | g.chr4:111441166G>A           | c.1512G>A        | p.M504I        | NM_001977    | neutral     | neutral |
| EP300    | 7441     | 2033   | Splice Site | g.chr22:41565621G>T           | c.4286_splice    | p.G1429_splice | NM_001429    |             |         |
| EPPK1    | 36773720 | 83481  | Missense    | g.chr8:144942098T>C           | c.5324A>G        | p.H1775R       | NM_031308    | neutral     | neutral |
| EPS8L1   | 2012     | 54869  | Missense    | g.chr19:55591149G>A           | c.209G>A         | p.R70Q         | NM_133180    | deleterious | medium  |
| ERAP2    | 2000136  | 64167  | Nonsense    | g.chr5:96230974G>T            | c.1150G>T        | p.E384*        | NM_022350    |             |         |
| ERBB2IP  | 2000120  | 55914  | Splice Site | g.chr5:65321806G>T            | c.1020_splice    | p.E340_splice  | NM_018695    |             |         |
| ERCC2    | 09_4178  | 2068   | Missense    | g.chr19:45872365G>C           | c.146C>T         | p.T49I         | NM_000400    | deleterious | high    |
| ERGIC3   | 131169   | 51614  | Missense    | g.chr20:34130630C>G           | c.307C>G         | p.L103V        | NM_015966    | neutral     | neutral |
| ESRP1    | 36773720 | 54845  | Splice Site | g.chr8:95654183G>A            | c.133_splice     | p.V45_splice   | NM_017697    |             |         |
| ESYT3    | 2000136  | 83850  | Missense    | g.chr3:138189851A>C           | c.1723A>C        | p.M575L        | NM_031913    | deleterious | medium  |
| EXOC6    | 505      | 54536  | Nonsense    | g.chr10:94659373A>T           | c.430A>T         | p.K144*        | NM_019053    |             |         |
| FAM134A  | 07_16582 | 79137  | Missense    | g.chr2:220044915T>A           | c.503T>A         | p.F168Y        | NM_024293    | neutral     | low     |
| FAM135A  | 05_6986  | 57579  | Missense    | g.chr6:71235512G>A            | c.2725G>A        | p.A909T        | NM_001162529 | neutral     | low     |
| FAM177A1 | 3492     | 283635 | Missense    | g.chr14:35548216C>T           | c.421C>T         | p.R141W        | NM_001079519 | deleterious | medium  |
| FAM194B  | 09_4178  | 220081 | Nonsense    | g.chr13:46149035C>T           | c.992G>A         | p.W331*        | NM_182542    |             |         |
| FAM196A  | 671204   | 642938 | Missense    | g.chr10:128974617C>T          | c.43G>A          | p.E15K         | NM_001039762 | neutral     | medium  |
| FAM207A  | 07_16582 | 85395  | Splice Site | g.chr21:46380085T>G           | c.352_splice     | p.K118_splice  | NM_058190    |             |         |
| FAM65C   | 06_2532  | 140876 | Missense    | g.chr20:49206268G>C           | c.2604C>G        | p.D868E        | NM_080829    | deleterious | low     |
| FAT3     | 4332     | 120114 | Nonsense    | g.chr11:92539627C>T           | c.9193C>T        | p.R3065*       | NM_001008781 |             |         |
| FAT4     | 2128     | 79633  | Missense    | g.chr4:126371875C>T           | c.9704C>T        | p.S3235L       | NM_024582    | deleterious | low     |
| FAT4     | 7136     | 79633  | Nonsense    | g.chr4:126372080C>G           | c.9909C>G        | p.Y3303*       | NM_024582    |             |         |
| FBN1     | 1739     | 2200   | Missense    | g.chr15:48797267A>G           | c.1915T>C        | p.C639R        | NM_000138    | deleterious | medium  |
| FBN2     | 11_3089  | 2201   | Missense    | g.chr5:127685092T>C           | c.2936A>G        | p.H979R        | NM_001999    | neutral     | neutral |
| FBXO43   | 36773720 | 286151 | Missense    | g.chr8:101146449C>G           | c.1818G>C        | p.L606F        | NM_001029860 | deleterious | low     |
| FBXW7    | 609      | 55294  | Missense    | g.chr4:153249384C>T           | c.1394G>A        | p.R465H        | NM_033632    | deleterious | high    |
| FCHO1    | 148632   | 23149  | Missense    | g.chr19:17887449G>A           | c.1213G>A        | p.A405T        | NM_001161358 | neutral     | neutral |
| FCRL5    | 11_3318  | 83416  | Missense    | g.chr1:157509139G>A           | c.1139C>T        | p.P380L        | NM_031281    | deleterious | medium  |
| FGD6     | 410      | 55785  | Missense    | g.chr12:95483365T>C           | c.3958A>G        | p.I1320V       | NM_018351    | neutral     | low     |
| FGF16    | 6536     | 8823   | Missense    | g.chrX:76709693G>A            | c.47G>A          | p.R16Q         | NM_003868    | deleterious |         |
| FGFR4    | 505      | 2264   | Missense    | g.chr5:176518079G>A           | c.577G>A         | p.G193R        | NM_002011    | deleterious | medium  |
| FGGY     | 36773720 | 55277  | Missense    | g.chr1:60091693C>A            | c.1045C>A        | p.P349T        | NM_018291    | neutral     | low     |
| FIGF     | 148632   | 2277   | Missense    | g.chrX:15364323C>A            | c.997G>T         | p.A333S        | NM_004469    | neutral     | low     |
| FILIP1   | 9534     | 27145  | Nonsense    | g.chr6:76022271G>A            | c.3277C>T        | p.R1093*       | NM_015687    |             |         |
| FILIP1L  | 09_4615  | 11259  | Missense    | g.chr3:99567698G>C            | c.2822C>G        | p.T941R        | NM_182909    | deleterious | medium  |
| FKBP9    | 9534     | 11328  | Indel       | g.chr7:33014299_33014300insTT | c.292_293insTT   | p.L98fs        | NM_007270    |             |         |
| FLG      | 671204   | 2312   | Missense    | g.chr1:152282080C>T           | c.5282G>A        | p.R1761H       | NM_020216    | none        | low     |
| FLJ44082 | 1781     | 389762 | Missense    | g.chr9:84562507A>G            | c.2339A>G        | p.N780S        | NM_207416    | neutral     | neutral |
| FMNL1    | 05_6986  | 752    | Missense    | g.chr17:43321321C>T           | c.2377C>T        | p.R793C        | NM_005892    | none        | medium  |
| FNIP1    | 980452   | 96459  | Missense    | g.chr5:131042228T>C           | c.790A>G         | p.S264G        | NM_133372    | deleterious | medium  |
| FOXL1    | 148632   | 221937 | Missense    | g.chr7:4796626A>G             | c.1052A>G        | p.N351S        | NM_001037165 | deleterious | high    |

|           |          |        |             |                       |               |                |              |             |         |
|-----------|----------|--------|-------------|-----------------------|---------------|----------------|--------------|-------------|---------|
| FOXO3     | 7097     | 2309   | Missense    | g.chr6:108985403C>A   | c.1367C>A     | p.P456Q        | NM_201559    | neutral     | neutral |
| FOXP2     | 2237     | 93986  | Missense    | g.chr7:114284748A>T   | c.998A>T      | p.H333L        | NM_014491    | none        | low     |
| FOXP2     | 1781     | 93986  | Missense    | g.chr7:114298130G>C   | c.1276G>C     | p.V426L        | NM_014491    | none        | medium  |
| FRAS1     | 11_17815 | 80144  | Missense    | g.chr4:79461758T>G    | c.11519T>G    | p.V3840G       | NM_025074    | deleterious | medium  |
| FREM2     | 142990   | 341640 | Missense    | g.chr13:39424333C>T   | c.6538C>T     | p.R2180C       | NM_207361    | deleterious | medium  |
| FSD1      | 131169   | 79187  | Missense    | g.chr19:4311959G>A    | c.611G>A      | p.R204Q        | NM_024333    | neutral     | medium  |
| FSIP2     | 9534     | 401024 | Missense    | g.chr2:186653523G>T   | c.1033G>T     | p.D345Y        |              |             | low     |
| FTSJD1    | 11_6165  | 55783  | Missense    | g.chr16:71319399T>C   | c.425A>G      | p.H142R        | NM_001099642 | deleterious | medium  |
| FTSJD1    | 07_16582 | 55783  | Nonsense    | g.chr16:71319480C>T   | c.344G>A      | p.W115*        | NM_001099642 |             |         |
| FUT6      | 705      | 2528   | Missense    | g.chr19:5832521G>C    | c.58C>G       | p.L20V         | NM_001040701 | neutral     | medium  |
| GABRA1    | 06_2532  | 2554   | Missense    | g.chr5:161302603G>T   | c.514G>T      | p.D172Y        | NM_000806    | deleterious | low     |
| GABRA3    | 09_4178  | 2556   | Missense    | g.chrX:151532936T>A   | c.107A>T      | p.E36V         | NM_000808    | neutral     | low     |
| GABRB1    | 7441     | 2560   | Nonsense    | g.chr4:47163485C>T    | c.460C>T      | p.R154*        | NM_000812    |             |         |
| GBP5      | 990149   | 115362 | Missense    | g.chr1:89729441C>T    | c.1340G>A     | p.R447Q        | NM_052942    | neutral     | neutral |
| GCK       | 65115    | 2645   | Missense    | g.chr7:44186189T>C    | c.892A>G      | p.M298V        | NM_000162    | deleterious | medium  |
| GCN1L1    | 122891   | 10985  | Missense    | g.chr12:120599377C>G  | c.2353G>C     | p.D785H        | NM_006836    | neutral     | medium  |
| GEMIN5    | 2237     | 25929  | Missense    | g.chr5:154271225A>T   | c.3838T>A     | p.F1280I       | NM_015465    | neutral     | low     |
| GLB1L     | 11_6165  | 79411  | Missense    | g.chr2:220107983G>C   | c.126C>G      | p.D42E         | NM_024506    | deleterious | medium  |
| GNAI2     | 05_6986  | 2771   | Missense    | g.chr3:50284505G>C    | c.5G>C        | p.R2T          | NM_001166425 |             | neutral |
| GNB4      | 111097   | 59345  | Missense    | g.chr3:179137211G>C   | c.179C>G      | p.A60G         | NM_021629    | neutral     | high    |
| GPATCH4   | 1781     | 54865  | Missense    | g.chr1:156568027T>G   | c.253A>C      | p.T85P         | NM_015590    | deleterious | low     |
| GPATCH8   | 06_2532  | 23131  | Missense    | g.chr17:42478169T>C   | c.1276A>G     | p.T426A        | NM_001002909 | none        | neutral |
| GPR113    | 11_17815 | 165082 | Missense    | g.chr2:26540943C>T    | c.227G>A      | p.R76Q         | NM_001145168 | neutral     | neutral |
| GPR119    | 4133     | 139760 | Missense    | g.chrX:129518908C>T   | c.514G>A      | p.V172I        | NM_178471    | neutral     | low     |
| GPR20     | 9534     | 2843   | Missense    | g.chr8:142367102C>T   | c.922G>A      | p.V308I        | NM_005293    | neutral     | low     |
| GPR64     | 05_6986  | 10149  | Missense    | g.chrX:19027744C>A    | c.1422G>T     | p.Q474H        | NM_001079858 | deleterious | medium  |
| GRIA2     | 11_17815 | 2891   | Missense    | g.chr4:158233974C>T   | c.613C>T      | p.R205W        | NM_001083619 | deleterious | high    |
| GRIN2B    | 7136     | 2904   | Missense    | g.chr12:13764773C>T   | c.1666G>A     | p.A556T        | NM_000834    | deleterious | low     |
| GRM4      | 2237     | 2914   | Nonsense    | g.chr6:34101247C>T    | c.27G>A       | p.W9*          | NM_000841    |             |         |
| GSTM4     | 65115    | 2948   | Nonsense    | g.chr1:110199381C>A   | c.84C>A       | p.Y28*         | NM_000850    |             |         |
| GTF3C1    | 122891   | 2975   | Splice Site | g.chr16:27506083C>G   | c.2778_splice | p.K926_splice  | NM_001520    |             |         |
| GUCY1A2   | 2000120  | 2977   | Missense    | g.chr11:106680807G>A  | c.1604C>T     | p.A535V        | NM_000855    | deleterious | high    |
| HARS      | 2128     | 3035   | Nonsense    | g.chr5:140054646C>A   | c.1267G>T     | p.E423*        | NM_002109    |             |         |
| HASU7     | 7441     | 55559  | Missense    | g.chrX:152721101C>G   | c.859G>C      | p.D287H        | NM_017518    | deleterious | low     |
| HEATR7B2  | 122891   | 133558 | Missense    | g.chr5:41008757G>A    | c.3559C>T     | p.R1187W       | NM_173489    | deleterious | low     |
| HELT      | 671204   | 391723 | Missense    | g.chr4:185941590G>T   | c.648G>T      | p.E216D        | NM_001029887 | neutral     | low     |
| HEPH      | 148632   | 9843   | Missense    | g.chrX:65418848C>G    | c.1851C>G     | p.F617I        | NM_138737    | deleterious | medium  |
| HERC1     | 1346     | 8925   | Missense    | g.chr15:63901348T>C   | c.14518A>G    | p.I4840V       | NM_003922    | deleterious | medium  |
| HERC1     | 1346     | 8925   | Missense    | g.chr15:63901348T>C   | c.14518A>G    | p.I4840V       | NM_003922    | deleterious | medium  |
| HIST1H1E  | 9534     | 3008   | Missense    | g.chr6:26156843G>C    | c.225G>C      | p.K75N         | NM_005321    | deleterious | medium  |
| HIST1HZAL | 7441     | 8332   | Missense    | g.chr6:27833185G>T    | c.53G>T       | p.R18L         | NM_003511    | none        |         |
| HOGA1     | 10_5283  | 112817 | Nonsense    | g.chr10:99358863G>T   | c.358G>T      | p.E120*        | NM_138413    |             |         |
| HOXB3     | 4133     | 3213   | Indel       | g.chr17:46629590delG  | c.247delC     | p.L83fs        | NM_002146    |             |         |
| HRAS      | 2000120  | 3265   | Missense    | g.chr11:534289C>A     | c.34G>T       | p.G12C         | NM_005343    | neutral     | medium  |
| HRC       | 11_6165  | 3270   | Missense    | g.chr19:4965777G>T    | c.718C>A      | p.H240N        | NM_002152    | deleterious | low     |
| HSD17B13  | 10_5283  | 345275 | Missense    | g.chr4:88238359C>T    | c.335G>A      | p.G112D        | NM_178135    | deleterious | high    |
| HSD3B2    | 1947     | 3284   | Missense    | g.chr1:119964452G>A   | c.328G>A      | p.A110T        | NM_000198    | neutral     | medium  |
| HSPG2     | 131169   | 3339   | Missense    | g.chr1:22155512G>A    | c.12053C>T    | p.A4018V       | NM_005529    | deleterious | low     |
| HSPG2     | 7441     | 3339   | Missense    | g.chr1:22202816G>A    | c.2909C>T     | p.S970F        | NM_005529    | neutral     | low     |
| ITR6      | 10_5342  | 3362   | Missense    | g.chr1:20005568C>T    | c.1030C>T     | p.R344C        | NM_000871    | deleterious | low     |
| HCAM4     | 980452   | 3386   | Missense    | g.chr19:10398349G>A   | c.532G>A      | p.E178K        | NM_001544    | deleterious | low     |
| IDH1      | 7097     | 3417   | Missense    | g.chr2:209113112C>T   | c.395G>A      | p.R132H        | NM_005896    | deleterious | high    |
| IGFBP2    | 118135   | 3485   | Missense    | g.chr2:217498311T>C   | c.44T>C       | p.L15P         | NM_000597    | none        | neutral |
| IGSF9B    | 4133     | 22997  | Nonsense    | g.chr11:133790388G>A  | c.3232C>T     | p.R1078*       | NM_014987    |             |         |
| IKBKAP    | 4133     | 8518   | Missense    | g.chr9:111674666G>A   | c.1067C>T     | p.P356L        | NM_003640    | neutral     | medium  |
| IL17A     | 148632   | 3605   | Missense    | g.chr6:52054071T>C    | c.449T>C      | p.I150T        | NM_002190    | deleterious | medium  |
| IL17F     | 11_17815 | 112744 | Missense    | g.chr6:52101944A>G    | c.277T>C      | p.Y93H         | NM_052872    | deleterious | medium  |
| IL17RD    | 122891   | 54756  | Indel       | g.chr3:57136550delTTG | c.935_936del  | p.312_312del   | NM_017563    |             |         |
| INO80D    | 609      | 54891  | Missense    | g.chr2:206869733G>T   | c.2443C>A     | p.Q815K        | NM_017759    | deleterious | neutral |
| INSRR     | 07_16582 | 3645   | Missense    | g.chr1:156821785C>A   | c.836G>T      | p.R279L        | NM_014215    | neutral     | neutral |
| INSRR     | 2039     | 3645   | Missense    | g.chr1:156823915T>G   | c.266A>C      | p.Y89S         | NM_014215    | neutral     | low     |
| INTS2     | 540      | 57508  | Missense    | g.chr17:59996779G>C   | c.655C>G      | p.P219A        | NM_020748    | deleterious | medium  |
| INTS4     | 2238     | 92105  | Missense    | g.chr11:77635919C>T   | c.1391G>A     | p.R464Q        | NM_033547    | deleterious | medium  |
| IQGAP2    | 07_16582 | 10788  | Missense    | g.chr5:75885446A>G    | c.533A>G      | p.E178G        | NM_006633    | deleterious | medium  |
| IRAK1     | 2000136  | 3654   | Nonsense    | g.chrX:153278656C>A   | c.1768G>T     | p.E590*        | NM_001569    |             |         |
| IRAK1     | 4133     | 3654   | Missense    | g.chrX:153278880T>C   | c.1544A>G     | p.Y515C        | NM_001569    | deleterious | medium  |
| IRF7      | 2237     | 3665   | Missense    | g.chr11:612770C>G     | c.1387G>C     | p.E463Q        | NM_001572    | deleterious | medium  |
| ITGA8     | 2238     | 8516   | Missense    | g.chr10:15561383G>C   | c.3011C>G     | p.P1004R       | NM_003638    | deleterious | medium  |
| ITGB8     | 980452   | 3696   | Missense    | g.chr7:20438538T>G    | c.1202T>G     | p.F401C        | NM_002214    | deleterious | medium  |
| ITI3      | 2000756  | 3699   | Missense    | g.chr3:52841807G>C    | c.2306G>C     | p.G769A        | NM_002217    | neutral     | medium  |
| ITM2B     | 1739     | 9445   | Nonsense    | g.chr13:48833055C>A   | c.687C>A      | p.Y229*        | NM_021999    |             |         |
| ITPRIP2   | 148632   | 162073 | Missense    | g.chr16:19126738G>A   | c.955G>A      | p.V319I        | NM_001034841 | neutral     | low     |
| JMJD1C    | 1781     | 221037 | Missense    | g.chr10:64927857A>G   | c.7571T>C     | p.V2524A       | NM_032776    | deleterious | medium  |
| KCNH6     | 2000136  | 81033  | Missense    | g.chr17:61621622C>G   | c.2354C>G     | p.P785R        | NM_030779    | neutral     | neutral |
| KCNJ10    | 2238     | 3766   | Missense    | g.chr1:160011714C>G   | c.609G>C      | p.M203I        | NM_002241    | deleterious | medium  |
| KDM6A     | 11_3318  | 7403   | Splice Site | g.chrX:44966782G>T    | c.4005_splice | p.E1335_splice | NM_021140    |             |         |
| KDM6A     | 148632   | 7403   | Missense    | g.chrX:44942839G>A    | c.3419G>A     | p.G1140E       | NM_021140    | deleterious | high    |
| KDM6A     | 11_3318  | 7403   | Missense    | g.chrX:44950030A>G    | c.3799A>G     | p.I1267V       | NM_021140    | neutral     | low     |
| KDM6A     | 3492     | 7403   | Missense    | g.chrX:44969442T>C    | c.4124T>C     | p.L1375P       | NM_021140    | deleterious | medium  |
| KDM6A     | 671204   | 7403   | Missense    | g.chrX:44938456A>G    | c.3004A>G     | p.T1002A       | NM_021140    | deleterious | medium  |
| KDM6B     | 2000756  | 23135  | Missense    | g.chr17:7751023T>C    | c.1417T>C     | p.C473R        | NM_001080424 |             | low     |

|           |          |          |             |                               |                  |                |              |             |         |
|-----------|----------|----------|-------------|-------------------------------|------------------|----------------|--------------|-------------|---------|
| KHDR851   | 131169   | 10657    | Missense    | g.chr1:32497129A>G            | c.512A>G         | p.N1715        | NM_006559    | deleterious | medium  |
| KIAA0556  | 80872    | 23247    | Missense    | g.chr16:27720036G>A           | c.1400G>A        | p.R467K        | NM_015202    | neutral     | neutral |
| KIAA1267  | 2039     | 284058   | Nonsense    | g.chr17:44117170T>A           | c.2101A>T        | p.K701*        | NM_015443    |             |         |
| KIAA1324L | 36773720 | 222223   | Missense    | g.chr7:86541434C>A            | c.2123G>T        | p.G708V        | NM_001142749 | deleterious | medium  |
| KIF18A    | 148632   | 81930    | Missense    | g.chr11:28104775G>C           | c.1090C>G        | p.L364V        | NM_031217    | neutral     | neutral |
| KIF20B    | 671204   | 9585     | Missense    | g.chr10:91518568A>G           | c.4609A>G        | p.I1537V       | NM_016195    | neutral     | low     |
| KIF4B     | 705      | 285643   | Missense    | g.chr5:154393993G>A           | c.574G>A         | p.E192K        | NM_001099293 | deleterious | medium  |
| KIR2DL4   | 2237     | 3805     | Missense    | g.chr19:55316353C>T           | c.182C>T         | p.T61M         | NM_002255    | neutral     | low     |
| KLF5      | 148632   | 688      | Missense    | g.chr13:73638016A>C           | c.1190A>C        | p.H397P        | NM_001730    | deleterious | high    |
| KLF8      | 1947     | 11279    | Missense    | g.chrX:56291748G>A            | c.217G>A         | p.E73K         | NM_007250    | deleterious | low     |
| KLHL12    | 3492     | 59349    | Missense    | g.chr1:202863872T>A           | c.1141A>T        | p.I381F        | NM_021633    | deleterious | medium  |
| KLHL26    | 990149   | 55295    | Missense    | g.chr19:18779963G>A           | c.1756G>A        | p.D586N        | NM_018316    | neutral     | low     |
| KLHL31    | 2237     | 401265   | Missense    | g.chr6:53519331C>G            | c.740G>C         | p.R247T        | NM_001003760 | deleterious | high    |
| KLHL4     | 36773720 | 56062    | Nonsense    | g.chrX:86888841C>T            | c.1642C>T        | p.R548*        | NM_019117    |             |         |
| KNTC1     | 36773720 | 9735     | Nonsense    | g.chr12:123052911C>T          | c.1708C>T        | p.R570*        | NM_014708    |             |         |
| KPNA5     | 3492     | 3841     | Missense    | g.chr6:117047658G>T           | c.1126G>T        | p.A376S        | NM_002269    | neutral     | medium  |
| KPNA5     | 3492     | 3841     | Missense    | g.chr6:117047659C>T           | c.1127C>T        | p.A376V        | NM_002269    | neutral     | medium  |
| KRT25     | 80872    | 147183   | Missense    | g.chr17:38906791G>A           | c.1016C>T        | p.A339V        | NM_181534    | neutral     | medium  |
| KRT35     | 4133     | 3886     | Missense    | g.chr17:39633882G>A           | c.1108C>T        | p.R370W        | NM_002280    | deleterious | high    |
| KRT36     | 9534     | 8699     | Missense    | g.chr17:39643859C>T           | c.830G>A         | p.R277H        | NM_003771    | neutral     | medium  |
| KRT4      | 36773720 | 3851     | Missense    | g.chr12:53202107G>A           | c.1318C>T        | p.R440W        | NM_002272    | deleterious | medium  |
| KRTAP13-4 | 05_6986  | 284827   | Nonsense    | g.chr21:31802760G>A           | c.167G>A         | p.W56*         | NM_181600    |             |         |
| KRTAP21-1 | 236      | 337977   | Missense    | g.chr21:32127473C>T           | c.224G>A         | p.C75Y         | NM_181619    | none        |         |
| KRTAP4-6  | 09_4178  | 18171    | Missense    | g.chr17:39296412T>A           | c.292A>T         |                |              |             | neutral |
| KRTAP5-1  | 2453     | 387264   | Missense    | g.chr11:1606133T>C            | c.347A>G         | p.K116R        | NM_001005922 | none        | neutral |
| L1CAM     | 3492     | 3897     | Missense    | g.chrX:153132320G>A           | c.2215C>T        | p.R739W        | NM_000425    | deleterious | medium  |
| LAMA3     | 505      | 3909     | Missense    | g.chr18:21441610T>A           | c.4423T>A        | p.F1475I       | NM_198129    | deleterious | low     |
| LAMA3     | 118135   | 3909     | Missense    | g.chr18:21364000T>A           | c.1482T>A        | p.N494K        | NM_198129    | deleterious | medium  |
| LAP3      | 142990   | 51056    | Missense    | g.chr4:17586654G>A            | c.599G>A         | p.R200H        | NM_015907    | deleterious | high    |
| LARP4B    | 6536     | 23185    | Missense    | g.chr10:875513T>C             | c.937A>G         | p.I313V        | NM_015155    | deleterious | medium  |
| LHFPL4    | 148632   | 375323   | Missense    | g.chr3:9594227C>A             | c.137G>T         | p.W46L         | NM_198560    | deleterious | high    |
| LHX6      | 2000120  | 26468    | Missense    | g.chr9:124979490G>A           | c.452C>T         | p.A151V        | NM_014368    | neutral     | neutral |
| LILRA4    | 2238     | 23547    | Missense    | g.chr19:54848198G>A           | c.1169C>T        | p.A390V        | NM_012276    | neutral     | medium  |
| LIPJ      | 9534     | 142910   | Missense    | g.chr10:90366552A>G           | c.989A>G         | p.H330R        | NM_001010939 | neutral     | low     |
| LIX1      | 2000756  | 167410   | Missense    | g.chr5:96460232G>A            | c.184C>T         | p.P62S         | NM_153234    | deleterious | neutral |
| LMNL      | 36773720 | 89782    | Nonsense    | g.chr3:197717491C>T           | c.991C>T         | p.R331*        | NM_033029    |             |         |
| LMNB2     | 7441     | 84823    | Missense    | g.chr19:2444438C>T            | c.305G>A         | p.G102E        | NM_032737    | deleterious | low     |
| LOXHD1    | 10_5283  | 125336   | Missense    | g.chr18:44087564C>T           | c.5443G>A        | p.D1815N       | NM_144612    | deleterious | low     |
| LPAR4     | 3492     | 2846     | Missense    | g.chrX:78010565C>T            | c.199C>T         | p.R67C         | NM_005296    | deleterious | low     |
| LPAR4     | 11_3318  | 2846     | Missense    | g.chrX:78010998T>C            | c.632T>C         | p.V211A        | NM_005296    | deleterious | medium  |
| LRP11     | 2238     | 84918    | Missense    | g.chr6:150185135T>C           | c.22A>G          | p.S8G          | NM_032832    | none        | neutral |
| LRP1B     | 65115    | 53553    | Missense    | g.chr2:141143548T>A           | c.10445A>T       | p.Q3482L       | NM_018557    | deleterious | low     |
| LRP2      | 980452   | 4036     | Missense    | g.chr2:170147426T>C           | c.851A>G         | p.K284R        | NM_004525    | neutral     | low     |
| LRRC23    | 6277     | 10233    | Missense    | g.chr12:7014864G>A            | c.67G>A          | p.E23K         | NM_001135217 | none        | low     |
| LRRC3C    | 2453     | 1.01E+08 | Missense    | g.chr17:38100551G>A           |                  |                |              |             | medium  |
| LRRC69    | 1781     | 1.00E+08 | Missense    | g.chr8:92213001G>A            | c.914G>A         | p.R305Q        | NM_001129890 | neutral     | neutral |
| LRRC7     | 11_6165  | 57554    | Missense    | g.chr1:70488846G>A            | c.1469G>A        | p.R490H        | NM_020794    | neutral     | neutral |
| LRRTM1    | 9534     | 347730   | Missense    | g.chr2:80530334G>C            | c.611C>G         | p.S204C        | NM_178839    | deleterious | medium  |
| LRWD1     | 148632   | 222229   | Missense    | g.chr7:102110239T>C           | c.1352T>C        | p.V451A        | NM_152892    | deleterious | medium  |
| LYPD4     | 7136     | 147719   | Missense    | g.chr19:42341380C>T           | c.578G>A         | p.R193H        | NM_173506    | deleterious | low     |
| MAGEC3    | 6536     | 139081   | Missense    | g.chrX:140984506A>C           |                  |                | NM_138702    |             | neutral |
| MAG1      | 3492     | 9223     | Indel       | g.chr3:65415431_65415432delAC | c.1930_1931delGT | p.V644fs       | NM_001033057 |             |         |
| MAG12     | 2237     | 9863     | Missense    | g.chr7:77764508A>T            | c.2861T>A        | p.I954N        | NM_012301    | deleterious | medium  |
| MAGT1     | 148632   | 84061    | Nonsense    | g.chrX:77131056C>T            | c.237G>A         | p.W79*         | NM_032121    |             |         |
| MAML3     | 2000136  | 55534    | Missense    | g.chr4:140812120A>T           | c.470T>A         | p.L157Q        | NM_018717    | neutral     | medium  |
| MAN2C1    | 7441     | 4123     | Missense    | g.chr15:75660528G>A           | c.113C>T         | p.A38V         | NM_006715    | neutral     | medium  |
| MAP2K2    | 980452   | 5605     | Missense    | g.chr19:4110556T>C            | c.401A>G         | p.Y134C        | NM_030662    | deleterious | high    |
| MASTL     | 3492     | 84930    | Missense    | g.chr10:27458958C>T           | c.1070C>T        | p.T357M        | NM_032844    | deleterious | low     |
| MBDS      | 2039     | 55777    | Missense    | g.chr2:149240820G>A           | c.2660G>A        | p.S887N        | NM_018328    | neutral     | low     |
| MCM4      | 7441     | 4173     | Missense    | g.chr8:48883928C>T            | c.1828C>T        | p.R610C        | NM_182746    | deleterious | high    |
| MED12     | 36773720 | 9968     | Missense    | g.chrX:70349948G>A            | c.3931G>A        | p.V1311M       | NM_005120    | neutral     | neutral |
| MEI5      | 09_4178  | 4211     | Missense    | g.chr2:66794591T>G            | c.972T>G         | p.I324M        | NM_002398    | deleterious | high    |
| MGA       | 505      | 23269    | Splice Site | g.chr15:42021360A>T           | c.3658_splice    | p.I1220_splice | NM_001164273 |             |         |
| MGA       | 11_3318  | 23269    | Nonsense    | g.chr15:42003509C>T           | c.3046C>T        | p.R1016*       | NM_001080541 |             |         |
| MGAT4A    | 122891   | 11320    | Missense    | g.chr2:99260483A>G            | c.923T>C         | p.I308T        | NM_012214    | neutral     | medium  |
| MGAT4C    | 2237     | 25834    | Missense    | g.chr12:86374058C>T           | c.446G>A         | p.R149H        | NM_013244    | deleterious | medium  |
| MGEA5     | 118135   | 10724    | Missense    | g.chr10:103563588G>C          | c.940C>G         | p.P314A        | NM_012215    | deleterious | medium  |
| MLL3      | 6112     | 58508    | Missense    | g.chr7:152027760A>C           | c.315T>G         | p.I105M        | NM_170606    | neutral     | neutral |
| MORF4L1   | 1346     | 10933    | Missense    | g.chr15:79186470C>G           | c.817C>G         | p.L273V        | NM_206839    | deleterious | high    |
| MOV10L1   | 11_6165  | 54456    | Missense    | g.chr22:50552163C>A           | c.830C>A         | p.T277K        | NM_018995    | deleterious | medium  |
| MPG       | 609      | 156565   | Indel       | g.chr16:129298insC            | c.7_8insC        | p.T3fs,        | NM_002434    |             |         |
| MPHOSPH9  | 3492     | 10198    | Nonsense    | g.chr12:123694652A>T          | c.689T>A         | p.L230*        | NM_022782    |             |         |
| MRPL45    | 7136     | 84311    | Missense    | g.chr17:36478044G>A           | c.696G>A         | p.M232I        | NM_032351    | deleterious | low     |
| MT1M      | 4133     | 4499     | Missense    | g.chr16:56667294G>A           | c.71G>A          | p.C24Y         | NM_176870    | deleterious | medium  |
| MTTP      | 2000120  | 4547     | Missense    | g.chr4:100521781T>G           | c.1127T>G        | p.L376W        | NM_000253    | deleterious | medium  |
| MUC16     | 05_6986  | 94025    | Splice Site | g.chr19:8974101G>A            | c.42570C>T       | p.G14190G      | NM_024690    |             |         |
| MUC16     | 65115    | 94025    | Missense    | g.chr19:9076729G>A            | c.10717C>T       | p.R3573C       | NM_024690    | none        | neutral |
| MUC16     | 1781     | 94025    | Missense    | g.chr19:9069032G>T            | c.18414C>A       | p.S6138R       | NM_024690    | none        | neutral |
| MUC4      | 4332     | 4585     | Missense    | g.chr3:195508174G>T           | c.9893C>A        | p.P3298H       | NM_018406    |             | neutral |
| MUC4      | 131169   | 4585     | Nonsense    | g.chr3:195492248C>T           | c.13307G>A       | p.W4436*       | NM_018406    |             |         |
| MYB       | 7441     | 4602     | Splice Site | g.chr6:135518098G>T           |                  |                | NM_005375    |             |         |

|         |          |        |             |                               |                |                   |  |              |             |         |
|---------|----------|--------|-------------|-------------------------------|----------------|-------------------|--|--------------|-------------|---------|
| MYB     | 7441     | 4602   | Splice Site | g.chr6:135518099G>T           |                |                   |  | NM_005375    |             |         |
| MYBL1   | 2128     | 4603   | Missense    | g.chr8:67511341T>C            | c.235A>G       | p.K79E            |  | NM_001080416 | neutral     | medium  |
| MYCBP2  | 1947     | 23077  | Nonsense    | g.chr13:77663083G>A           | c.10495C>T     | p.R3499*          |  | NM_015057    |             |         |
| MYCN    | 11_6165  | 4613   | Missense    | g.chr2:16085866A>G            | c.1042A>G      | p.K348E           |  | NM_005378    | deleterious | medium  |
| MYH1    | 2039     | 4619   | Missense    | g.chr17:10398310C>A           | c.5404G>T      | p.D1802Y          |  | NM_005963    | deleterious | high    |
| MYOM2   | 990149   | 9172   | Missense    | g.chr8:2057234G>A             | c.3092G>A      | p.R1031Q          |  | NM_003970    | neutral     | neutral |
| MYST3   | 1781     | 7994   | Missense    | g.chr8:41790003T>C            | c.5735A>G      | p.N1912S          |  | NM_001099412 | deleterious | low     |
| N4BP1   | 11_6165  | 9683   | Nonsense    | g.chr16:48595187G>T           | c.1367C>A      | p.S456*           |  | NM_153029    |             |         |
| NAA16   | 236      | 79612  | Missense    | g.chr13:41894863G>A           | c.305G>A       | p.C102Y           |  | NM_024561    | deleterious | high    |
| NAB2    | 505      | 4665   | Indel       | g.chr12:57484990delTCC        | c.166_168del   | p.S6_56del,       |  | NM_005967    |             |         |
| NAP1L3  | 9534     | 4675   | Missense    | g.chrX:92927507G>C            | c.797C>G       | p.P266R           |  | NM_004538    | none        | neutral |
| NAPSA   | 6536     | 9476   | Missense    | g.chr19:50864201T>C           | c.665A>G       | p.N222S           |  | NM_004851    | deleterious | neutral |
| NAT8B   | 671204   | 51471  | Missense    | g.chr2:73928065C>T            | c.368G>A       | p.G123E           |  | NM_016347    | deleterious | medium  |
| NCAM2   | 36773720 | 4685   | Nonsense    | g.chr21:22790859A>T           | c.1450A>T      | p.R484*           |  | NM_004540    |             |         |
| NCAPG   | 148632   | 64151  | Missense    | g.chr4:17819667G>T            | c.1074G>T      | p.E358D           |  | NM_022346    | neutral     | low     |
| NDUFS3  | 3492     | 4722   | Missense    | g.chr11:47603931A>G           | c.538A>G       | p.N180D           |  | NM_004551    | deleterious | medium  |
| NFIB    | 2020     | 4781   | Indel       | chr9:14120513delGA            | c.1170_1171del | p.390_391del,NFIB |  | NM_005596    |             |         |
| NFIB    | 540      | 4781   | Nonsense    | g.chr9:14150203G>C            | c.747C>G       | p.Y249*           |  | NM_005596    |             |         |
| NFIX    | 2012     | 4784   | Indel       | chr19:13184245insTT           | c.632_633insTT | p.S211fs,         |  | NM_002501    |             |         |
| NLGN2   | 11_3318  | 57555  | Missense    | g.chr17:7319074C>T            | c.1282C>T      | p.R428W           |  | NM_020795    | deleterious | medium  |
| NLRP3   | 2000756  | 197358 | Missense    | g.chr16:3614583C>T            | c.355G>A       | p.A119T           |  | NM_178844    | neutral     | medium  |
| NLRP12  | 540      | 91662  | Missense    | g.chr19:54314225C>T           | c.688G>A       | p.V230M           |  | NM_144687    | deleterious | low     |
| NOTCH1  | 7097     | 4851   | Missense    | g.chr9:139412240C>A           | c.1405G>T      | p.D469Y           |  | NM_017617    | deleterious | high    |
| NOTCH1  | 3492     | 4851   | Missense    | g.chr9:139390907G>C           | c.7284C>G      | p.H2428Q          |  | NM_017617    | neutral     | low     |
| NOTCH1  | 3492     | 4851   | Missense    | g.chr9:139390906G>C           | c.7285C>G      | p.L2429V          |  | NM_017617    | neutral     | neutral |
| NOTCH1  | 2012     | 4851   | Nonsense    | g.chr9:139405607G>A           | c.2584C>T      | p.Q862*           |  | NM_017617    |             |         |
| NOTUM   | 2237     | 147111 | Missense    | g.chr17:79915743C>A           | c.634G>T       | p.V212L           |  | NM_178493    | neutral     | low     |
| NPC1    | 2039     | 4864   | Missense    | g.chr18:21112227T>C           | c.3776A>G      | p.K1259R          |  | NM_000271    | neutral     | low     |
| NR1H3   | 11_6165  | 10062  | Missense    | g.chr11:47290233G>A           | c.1330G>A      | p.D444N           |  | NM_005693    | deleterious | medium  |
| NR1H3   | 4133     | 10062  | Missense    | g.chr11:47282193C>T           | c.466C>T       | p.R156C           |  | NM_005693    | deleterious | medium  |
| NRCAM   | 05_6986  | 4897   | Missense    | g.chr7:107864227T>C           | c.832A>G       | p.S278G           |  | NM_001037132 | deleterious | medium  |
| NSD1    | 1346     | 64324  | Missense    | g.chr5:176666853G>C           | c.4289G>C      | p.G1430A          |  | NM_022455    | deleterious | medium  |
| NT5C3   | 505      | 51251  | Missense    | g.chr7:33060887T>G            | c.452A>C       | p.E151A           |  | NM_001002010 | deleterious | medium  |
| NT5C3   | 1739     | 51251  | Missense    | g.chr7:33055293G>T            | c.898C>A       | p.L300I           |  | NM_001002010 | deleterious | medium  |
| NTNG1   | 671204   | 22854  | Missense    | g.chr1:107691402G>A           | c.187G>A       | p.V63M            |  | NM_001113226 | deleterious | medium  |
| NUP50   | 148632   | 10762  | Missense    | g.chr22:45579374C>T           | c.1177C>T      | p.L393F           |  | NM_007172    | deleterious | medium  |
| NUP50   | 148632   | 10762  | Missense    | g.chr22:45579373G>C           | c.1176G>C      | p.Q392H           |  | NM_007172    | deleterious | medium  |
| NXPH4   | 148632   | 11247  | Missense    | g.chr12:57618927G>C           | c.324G>C       | p.W108C           |  | NM_007224    | deleterious | medium  |
| OBSCN   | 3492     | 84033  | Missense    | g.chr1:228564967G>A           | c.23254G>A     | p.E7752K          |  | NM_001098623 | neutral     | high    |
| ODZ2    | 2000756  | 57451  | Missense    | g.chr5:167689316T>G           | c.7799T>G      | p.M2600R          |  | NM_001122679 |             | low     |
| ODZ3    | 4133     | 55714  | Missense    | g.chr4:183696121A>G           | c.5119A>G      | p.I1707V          |  | NM_001080477 | neutral     | neutral |
| ODZ4    | 7097     | 26011  | Missense    | g.chr11:78381509C>T           | c.5881G>A      | p.V1961M          |  | NM_001098816 |             | low     |
| OPN3    | 236      | 23596  | Missense    | g.chr1:241761094G>A           | c.899C>T       | p.S300L           |  | NM_014322    | deleterious | medium  |
| OPRK1   | 80872    | 4986   | Missense    | g.chr8:54163351C>A            | c.247G>T       | p.V83L            |  | NM_000912    | neutral     | medium  |
| OPRM1   | 990149   | 4988   | Missense    | g.chr6:154412237G>A           | c.794G>A       | p.R265H           |  | NM_000914    | deleterious | medium  |
| OR10A2  | 2237     | 341276 | Missense    | g.chr11:6891762G>T            | c.777G>T       | p.K259N           |  | NM_001004460 | deleterious | high    |
| OR10H5  | 2282     | 284433 | Missense    | g.chr19:15905193C>A           | c.335C>A       | p.S112Y           |  | NM_001004466 | deleterious | high    |
| OR10I1  | 11_6165  | 26476  | Missense    | g.chr1:159409708A>T           | c.160A>T       | p.I54F            |  | NM_012351    | neutral     | low     |
| OR11H1  | 3492     | 81061  | Missense    | g.chr22:16449539A>G           | c.266T>C       | p.V89A            |  | NM_001005239 | neutral     | medium  |
| OR13C4  | 671204   | 138804 | Missense    | g.chr9:107288811C>T           | c.680G>A       | p.R227Q           |  | NM_001001919 | neutral     | medium  |
| OR13D1  | 07_16582 | 286365 | Missense    | g.chr9:107457728T>A           | c.1026T>A      | p.H342Q           |  | NM_001004484 | deleterious | low     |
| OR2W3   | 05_6986  | 343171 | Missense    | g.chr1:248059607C>T           | c.719C>T       | p.T240I           |  | NM_001001957 | deleterious | high    |
| ORS5D16 | 122891   | 390144 | Missense    | g.chr11:55606759C>G           | c.532C>G       | p.H178D           |  | NM_001005496 | deleterious | high    |
| ORSL2   | 11_6165  | 26338  | Missense    | g.chr11:55594894C>T           | c.200C>T       | p.S67F            |  | NM_001004739 | deleterious | high    |
| OR6K3   | 7136     | 391114 | Missense    | g.chr1:158687115G>T           | c.839C>A       | p.T280N           |  | NM_001005327 | deleterious | low     |
| OR8B8   | 10_5283  | 26493  | Missense    | g.chr11:124310419G>A          | c.563C>T       | p.A188V           |  | NM_012378    | neutral     | low     |
| OSR1    | 10_5283  | 130497 | Indel       | g.chr2:19552135_19552136delTT | c.701_702delAA | p.Q234fs          |  | NM_145260    |             |         |
| OTP     | 09_4178  | 23440  | Missense    | g.chr5:76926516A>G            | c.551T>C       | p.F184S           |  | NM_032109    | deleterious | medium  |
| OVOL1   | 2000756  | 5017   | Missense    | g.chr11:65561564C>T           | c.163C>T       | p.P55S            |  | NM_004561    | neutral     | neutral |
| PABPC3  | 36773720 | 5042   | Missense    | g.chr13:25671348G>C           | c.1012G>C      | p.V338L           |  | NM_003079    | deleterious | high    |
| PAPPA2  | 2237     | 60676  | Missense    | g.chr1:176563998C>T           | c.1258C>T      | p.R420C           |  | NM_020318    | deleterious | medium  |
| PAX2    | 2000120  | 5076   | Missense    | g.chr10:102566259G>C          | c.758C>G       | p.A253G           |  | NM_003990    | neutral     | neutral |
| PC      | 6277     | 5091   | Missense    | g.chr11:66618600C>T           | c.2134G>A      | p.D712N           |  | NM_022172    | neutral     | low     |
| PCDH18  | 990149   | 54510  | Missense    | g.chr4:138449961A>G           | c.2501T>C      | p.L834P           |  | NM_019035    | deleterious | medium  |
| PCDHA2  | 07_16582 | 56146  | Missense    | g.chr5:140176744G>A           | c.2195G>A      | p.R732H           |  | NM_018905    | neutral     | low     |
| PCDH810 | 2237     | 56126  | Missense    | g.chr5:140572612G>A           | c.487G>A       | p.G163R           |  | NM_018930    | deleterious | high    |
| PCDH811 | 1346     | 56125  | Missense    | g.chr5:140580699T>C           | c.1352T>C      | p.F451S           |  | NM_018931    | deleterious | high    |
| PCDHGB4 | 505      | 8641   | Missense    | g.chr5:140769277C>G           | c.1826C>T      | p.A609V           |  | NM_003736    | deleterious | medium  |
| PCDHGC3 | 6536     | 5098   | Missense    | g.chr5:140856401A>G           | c.718A>G       | p.N240D           |  | NM_002588    | deleterious | high    |
| PCF11   | 479      | 51585  | Missense    | g.chr11:82875435G>A           | c.694G>A       | p.A232T           |  | NM_015885    | deleterious | medium  |
| PDE3B   | 609      | 5140   | Missense    | g.chr11:14880694C>A           | c.2626C>A      | p.H876N           |  | NM_000922    | neutral     | low     |
| PDE8A   | 05_6986  | 5151   | Missense    | g.chr15:85657110A>C           | c.1192A>C      | p.N398H           |  | NM_002605    | deleterious | medium  |
| PDZD2   | 9534     | 23037  | Missense    | g.chr5:32059371G>A            | c.2227G>A      | p.A743T           |  | NM_178140    | deleterious | low     |
| PGR     | 609      | 5241   | Missense    | g.chr11:100998812G>T          | c.990C>A       | p.D330E           |  | NM_000926    | deleterious | medium  |
| PHC2    | 06_2532  | 1912   | Missense    | g.chr1:33820083G>A            | c.1474C>T      | p.H492Y           |  | NM_198040    | deleterious | low     |
| PHF2    | 148632   | 5253   | Missense    | g.chr9:96408054A>G            | c.443A>G       | p.D148G           |  | NM_005392    | deleterious | medium  |
| PHF20   | 3492     | 51230  | Nonsense    | g.chr20:34430571_34430572insA | c.160_161insA  | p.Y54fs           |  | NM_016436    |             |         |
| PHOX2B  | 07_16582 | 8929   | Missense    | g.chr4:41750440C>A            | c.188G>T       | p.G63V            |  | NM_003924    | neutral     | neutral |
| PIGO    | 07_16582 | 84720  | Missense    | g.chr9:35093044G>A            | c.1102C>T      | p.H368Y           |  | NM_032634    | neutral     | low     |
| PIK3CA  | 2237     | 5290   | Missense    | g.chr3:178927980T>C           | c.1258T>C      | p.C420R           |  | NM_006218    | deleterious | medium  |
| PIK3CA  | 2012     | 5290   | Missense    | g.chr3:178952072A>G           | c.3127A>G      | p.M1043V          |  | NM_006218    | deleterious | neutral |

|          |          |        |             |                                |                 |               |              |             |         |
|----------|----------|--------|-------------|--------------------------------|-----------------|---------------|--------------|-------------|---------|
| PIK3CA   | 3492     | 5290   | Missense    | g.chr3:178921553T>A            | c.1035T>A       | p.N345K       | NM_006218    | deleterious | medium  |
| PIK3CG   | 2039     | 5294   | Missense    | g.chr7:106508152G>A            | c.146G>A        | p.R49H        | NM_002649    | neutral     | medium  |
| PKD11    | 6536     | 168507 | Missense    | g.chr7:47945520T>A             | c.1442A>T       | p.Y481F       | NM_138295    | deleterious | neutral |
| PKD2     | 505      | 5311   | Missense    | g.chr4:88977258T>G             | c.1737T>G       | p.F579L       | NM_000297    | neutral     | medium  |
| PKHD1    | 09_4178  | 5314   | Missense    | g.chr6:51503691G>C             | c.11462C>G      | p.S3821C      | NM_138694    | deleterious | medium  |
| PLA2G2C  | 07_16582 | 391013 | Missense    | g.chr1:20490579C>T             | c.358G>A        | p.V120M       | NM_001105572 |             | medium  |
| PLA2G6   | 2000756  | 8398   | Missense    | g.chr22:38516860G>A            | c.1648C>T       | p.R550W       | NM_003560    | deleterious | medium  |
| PLCD1    | 2237     | 5333   | Missense    | g.chr3:38058148C>T             | c.262G>A        | p.A88T        | NM_006225    | neutral     | low     |
| PLCL1    | 6536     | 5334   | Missense    | g.chr2:198949880G>A            | c.1639G>A       | p.D547N       | NM_001114661 | neutral     | low     |
| PLCZ1    | 1947     | 89869  | Missense    | g.chr12:18854436T>C            | c.1016A>G       | p.K339R       | NM_033123    | neutral     | neutral |
| PLCZ1    | 1781     | 89869  | Missense    | g.chr12:18876362G>A            | c.250C>T        | p.R84W        | NM_033123    | deleterious | medium  |
| PLXNB1   | 10_5283  | 5364   | Missense    | g.chr3:48453983C>G             | c.4901G>C       | p.R1634P      | NM_002673    | deleterious | high    |
| POGK     | 2012     | 57645  | Missense    | g.chr1:166819104G>A            | c.1288G>A       | p.G430R       | NM_017542    | deleterious | medium  |
| POMGNT1  | 990149   | 55624  | Missense    | g.chr1:46654554G>C             |                 |               | NM_017739    |             |         |
| POU2F3   | 9534     | 25833  | Nonsense    | g.chr11:120175748C>T           | c.454C>T        | p.H152Y       | NM_014352    |             | neutral |
| PPM1A    | 980452   | 5494   | Missense    | g.chr14:60749782G>A            | c.361G>A        | p.G121S       | NM_021003    | neutral     | low     |
| PRDM16   | 1346     | 63976  | Missense    | g.chr1:3328395C>T              | c.1634C>T       | p.A545V       | NM_022114    | neutral     | low     |
| PRK1     | 148632   | 5584   | Missense    | g.chr3:170002369C>G            | c.1188C>G       | p.D396E       | NM_002740    | deleterious | high    |
| PRK1     | 6277     | 5587   | Missense    | g.chr14:30100004G>A            | c.1616C>T       | p.A539V       | NM_002742    | deleterious | medium  |
| PRK2     | 7097     | 25865  | Missense    | g.chr19:47184936A>C            | c.2041T>G       | p.L681V       | NM_001079881 | deleterious | high    |
| PRKDC    | 705      | 5591   | Missense    | g.chr8:48691321T>C             | c.11525A>G      | p.N3842S      | NM_001081640 |             |         |
| PRKG1    | 1781     | 5592   | Missense    | g.chr10:52913011T>G            | c.354T>G        | p.C118W       | NM_001098512 | deleterious | medium  |
| PSMB9    | 2039     | 5698   | Missense    | g.chr6:32826231G>C             | c.445G>C        | p.A149P       | NM_148954    | neutral     | medium  |
| PTEN     | 609      | 5728   | Missense    | g.chr10:89692946A>C            | c.430A>C        | p.K144Q       | NM_000314    | neutral     | low     |
| PTEN     | 609      | 5728   | Indel       | g.chr10:89692905delG           | c.389delG       | p.R130fs      | NM_000314    |             |         |
| PTPDC1   | 2000756  | 138639 | Missense    | g.chr9:96847560A>G             | c.110A>G        | p.Y37C        | NM_177995    | deleterious | medium  |
| PTPRG    | 380      | 5793   | Nonsense    | g.chr3:62204575G>T             | c.2206G>T       | p.E736*       | NM_002841    |             |         |
| PTPRH    | 111097   | 5794   | Nonsense    | g.chr19:55708669C>G            | c.1806G>A       | p.W602*       | NM_002842    |             |         |
| PTPRJ    | 142990   | 5795   | Missense    | g.chr11:48188825C>T            | c.3925C>T       | p.L1309F      | NM_002843    | deleterious | low     |
| PTPRK    | 09_4178  | 5796   | Indel       | g.chr6:128410928_128410929insC | c.1371_1372insG | p.L457fs      | NM_002844    |             |         |
| PXDN     | 06_2532  | 7837   | Missense    | g.chr2:1643087G>A              | c.4060C>T       | p.R1354W      | NM_012293    | deleterious | low     |
| PXK      | 7136     | 54899  | Missense    | g.chr3:58382830T>C             | c.887T>C        | p.L296P       | NM_017771    | deleterious | medium  |
| RAB3GAP2 | 131169   | 25782  | Missense    | g.chr1:220364615C>T            | c.1282G>A       | p.A428T       | NM_012414    | deleterious | medium  |
| RAB40B   | 09_4178  | 10966  | Missense    | g.chr17:80615812C>G            | c.764G>C        | p.R255P       | NM_006822    | neutral     | low     |
| RABGAP1  | 2012     | 23637  | Missense    | g.chr9:125748532G>A            | c.424G>A        | p.E142K       | NM_012197    | deleterious | medium  |
| RABGAP1  | 2012     | 23637  | Nonsense    | g.chr9:125748604G>T            | c.496G>T        | p.E166*       | NM_012197    |             |         |
| RALA     | 609      | 5898   | Missense    | g.chr7:39726340T>A             | c.74T>A         | p.V25E        | NM_005402    | deleterious | high    |
| RANBP17  | 11_17815 | 64901  | Missense    | g.chr5:170626749A>B            | c.2114A>G       | p.N705S       | NM_022897    | neutral     | neutral |
| RAP1B    | 142990   | 5908   | Missense    | g.chr12:69042538G>A            | c.34G>A         | p.G12R        | NM_001089704 | deleterious |         |
| RAS11A   | 07_16582 | 387496 | Missense    | g.chr13:27847330T>C            | c.428T>C        | p.I143T       | NM_206827    | neutral     | low     |
| RB1      | 131169   | 5925   | Missense    | g.chr13:49030342A>G            | c.1817A>G       | p.Y606C       | NM_000321    | deleterious | medium  |
| REC8     | 36773720 | 9985   | Missense    | g.chr14:24641808C>T            | c.47C>T         | p.A16V        | NM_005132    | none        | medium  |
| REC8     | 7097     | 9985   | Missense    | g.chr14:24647379C>T            | c.947C>T        | p.P316L       | NM_005132    | neutral     | neutral |
| RGNEF    | 7097     | 64283  | Missense    | g.chr5:73179619C>T             | c.2965C>T       | p.R989C       | NM_001080479 | deleterious | medium  |
| RGS11    | 11_3318  | 353299 | Missense    | g.chr1:182509456A>C            | c.2569A>C       | p.N857H       | NM_001137669 | deleterious | medium  |
| RIMBP2   | 2000120  | 23504  | Missense    | g.chr12:130926642T>A           | c.1204A>T       | p.I402F       | NM_015347    | deleterious | medium  |
| RIMBP2   | 540      | 23504  | Missense    | g.chr12:130907016C>T           | c.2452G>A       | p.V818M       | NM_015347    | neutral     | neutral |
| RIN2     | 2237     | 54453  | Missense    | g.chr20:19937318G>A            | c.218G>A        | p.R73Q        | NM_018993    | deleterious | low     |
| RIPPLY2  | 6277     | 134701 | Missense    | g.chr6:84567055T>A             | c.334T>A        | p.Y112N       | NM_001009994 | deleterious | medium  |
| RIT1     | 142990   | 6016   | Missense    | g.chr1:155874272C>T            | c.259G>A        | p.D87N        | NM_006912    | deleterious | high    |
| RIT1     | 505      | 6016   | Missense    | g.chr1:155880486T>C            | c.67A>G         | p.K23E        | NM_006912    | deleterious | high    |
| RLF      | 2237     | 6018   | Nonsense    | g.chr1:40705233C>G             | c.4859C>G       | p.S1620*      | NM_012421    |             |         |
| RLIM     | 2000756  | 51132  | Missense    | g.chrX:73812846G>A             | c.304C>T        | p.L102F       | NM_183353    | deleterious | medium  |
| RNF111   | 1739     | 54778  | Missense    | g.chr15:59383319T>C            | c.2705T>C       | p.I902T       | NM_017610    | deleterious | low     |
| RNF148   | 2000756  | 378925 | Missense    | g.chr7:122342759A>G            | c.46T>C         | p.S16P        | NM_198085    | neutral     | low     |
| RNF219   | 07_16582 | 79596  | Nonsense    | g.chr13:79212993C>A            | c.514G>T        | p.E172*       | NM_024546    |             |         |
| RNF32    | 2000120  | 140545 | Missense    | g.chr7:156447287A>T            | c.292A>T        | p.I98F        | NM_030936    | neutral     | neutral |
| RNF40    | 36773720 | 9810   | Missense    | g.chr16:30775607C>G            | c.550C>G        | p.R184G       | NM_014771    | deleterious | medium  |
| RNPEP    | 4133     | 6051   | Missense    | g.chr1:201973602T>G            | c.1772T>G       | p.V591G       | NM_020216    | deleterious | medium  |
| RORA     | 2000756  | 6095   | Missense    | g.chr15:60803461C>T            | c.883G>A        | p.G295S       | NM_134260    | neutral     | low     |
| RP1L1    | 09_4615  | 94137  | Missense    | g.chr8:10480624C>T             | c.88G>A         | p.V30I        | NM_178857    | neutral     | neutral |
| RSBN1    | 148632   | 54665  | Missense    | g.chr1:114308720G>A            | c.2291C>T       | p.S764L       | NM_018364    | neutral     | low     |
| RSPH3    | 2000120  | 83861  | Missense    | g.chr6:159420665T>C            | c.344A>G        | p.H115R       | NM_031924    | deleterious | low     |
| RUNX1    | 980452   | 861    | Nonsense    | g.chr21:36171600G>C            | c.884C>G        | p.S295*       | NM_001001890 |             |         |
| RYR2     | 705      | 6262   | Splice Site | g.chr1:237868513G>A            | c.9450G>A       | p.R3150R      | NM_001035    |             |         |
| RYR3     | 2012     | 6263   | Nonsense    | g.chr15:34078011C>A            | c.9417C>A       | p.C3139*      | NM_001036    |             |         |
| RYR3     | 1346     | 6263   | Missense    | g.chr15:33872202A>G            | c.1294A>G       | p.I432V       | NM_001036    | neutral     | neutral |
| RYR3     | 671204   | 6263   | Missense    | g.chr15:33954455G>A            | c.4724G>A       | p.R1575H      | NM_001036    | deleterious | medium  |
| RYR3     | 09_4615  | 6263   | Missense    | g.chr15:34157408A>G            | c.14594A>G      | p.Y4865C      | NM_001036    | deleterious | medium  |
| SAMHD1   | 7136     | 25939  | Missense    | g.chr20:35540873A>G            | c.1145T>C       | p.I382T       | NM_015474    | neutral     | medium  |
| SBNO1    | 2000756  | 55206  | Missense    | g.chr12:123780460C>A           | c.4177G>T       | p.A1393S      | NM_018183    | neutral     | neutral |
| SCEL     | 118135   | 8796   | Missense    | g.chr13:78138015T>A            | c.271T>A        | p.S91T        | NM_144777    | deleterious | low     |
| SCUBE3   | 111097   | 222663 | Splice Site | g.chr6:35209689T>A             | c.1417_splice   | p.E473_splice | NM_152753    |             |         |
| SDSL     | 3492     | 113675 | Missense    | g.chr12:113866997G>T           | c.247G>T        | p.A835        | NM_138432    | neutral     | medium  |
| SEC24A   | 671204   | 10802  | Missense    | g.chr5:134029429T>A            | c.1792T>A       | p.L598I       | NM_021982    | deleterious | medium  |
| SELP     | 2237     | 6403   | Nonsense    | g.chr1:169586615A>T            | c.132T>A        | p.Y44*        | NM_003005    |             |         |
| SEMA3G   | 09_4615  | 56920  | Missense    | g.chr3:52473743A>G             | c.1420T>C       | p.S474P       | NM_020163    | neutral     | low     |
| SEMA4D   | 2012     | 10507  | Missense    | g.chr9:92002518G>C             | c.1113C>G       | p.I371M       | NM_006378    | deleterious | medium  |
| SEMA4G   | 142990   | 57715  | Missense    | g.chr10:102738764C>T           | c.802C>T        | p.R268C       | NM_017893    | deleterious | high    |
| SEMA5A   | 6277     | 9037   | Missense    | g.chr5:9190558T>G              | c.1094A>C       | p.Y365S       | NM_003966    | deleterious | neutral |
| SERTAD4  | 479      | 56256  | Missense    | g.chr1:210412892T>C            | c.230T>C        | p.F77S        | NM_019605    | deleterious | low     |

|           |          |        |             |                       |                 |            |              |             |         |
|-----------|----------|--------|-------------|-----------------------|-----------------|------------|--------------|-------------|---------|
| SETD2     | 1781     | 29072  | Missense    | g.chr3:47164831C>T    | c.1295G>A       | p.R432H    | NM_014159    | deleterious | low     |
| SEZ6L     | 1947     | 23544  | Missense    | g.chr22:26706742C>T   | c.1621C>T       | p.R541C    | NM_021115    | deleterious | medium  |
| SF3A3     | 148632   | 10946  | Nonsense    | g.chr1:38453346G>A    | c.202C>T        | p.R68*     | NM_006802    |             |         |
| SF3B1     | 7136     | 23451  | Missense    | g.chr2:198267484G>A   | c.1873C>T       | p.R625C    | NM_012433    | deleterious | high    |
| SF3B1     | 10_5283  | 23451  | Missense    | g.chr2:198267483C>A   | c.1874G>T       | p.R625L    | NM_012433    | deleterious | high    |
| SIP1A1L2  | 410      | 57568  | Missense    | g.chr1:232539886G>A   | c.4801C>T       | p.H1601Y   | NM_020808    | deleterious | medium  |
| SIRT6     | 9534     | 51548  | Missense    | g.chr19:4180893G>C    | c.80C>G         | p.P27R     | NM_016539    | deleterious | medium  |
| SLC16A4   | 671204   | 9122   | Missense    | g.chr1:110906527G>T   |                 |            | NM_004696    |             |         |
| SLC22A12  | 1781     | 116085 | Splice Site | g.chr11:64361031C>T   | c.661C>T        | p.L221L    | NM_144585    |             |         |
| SLC22A5   | 118135   | 6584   | Missense    | g.chr5:131705729T>A   | c.65T>A         | p.F22Y     | NM_003060    | deleterious | low     |
| SLC25A2   | 11_17815 | 83884  | Missense    | g.chr5:140682943C>T   | c.490G>A        | p.D164N    | NM_031947    | neutral     | low     |
| SLC25A2   | 11_17815 | 83884  | Missense    | g.chr5:140682944C>A   | c.489G>T        | p.K163N    | NM_031947    | neutral     | low     |
| SLC25A24  | 148632   | 29957  | Missense    | g.chr1:108686203T>C   | c.1060A>G       | p.I354V    | NM_013386    | neutral     | low     |
| SLC37A3   | 6277     | 84255  | Splice Site | g.chr7:140055468C>T   | c.618G>A        | p.E206E    | NM_207113    |             |         |
| SLCA4A    | 4133     | 57282  | Missense    | g.chr2:162762373A>G   | c.1973A>G       | p.D658G    | NM_022058    | neutral     | low     |
| SLC9A4    | 705      | 389015 | Missense    | g.chr2:103124727C>T   | c.1388C>T       | p.T463I    | NM_001011552 | deleterious | high    |
| SLC9A7    | 705      | 84679  | Missense    | g.chrX:46529111G>C    | c.724C>G        | p.Q242E    | NM_032591    | deleterious | low     |
| SLIT3     | 80872    | 6586   | Missense    | g.chr5:168098402G>A   | c.3928C>T       | p.R1310C   | NM_003062    | deleterious | medium  |
| SMARCA2   | 2039     | 6595   | Missense    | g.chr9:2110356G>T     | c.3395G>T       | p.G1132V   | NM_003070    | deleterious | high    |
| SMARCA2   | 7441     | 6595   | Missense    | g.chr9:2115855G>T     | c.3490G>T       | p.G1164W   | NM_003070    | deleterious | high    |
| SMARCA2   | 705      | 6595   | Missense    | g.chr9:2110338C>T     | c.3377C>T       | p.T1126I   | NM_003070    | deleterious | medium  |
| SMARCE1   | 1346     | 6605   | Missense    | g.chr17:38793763T>C   | c.218A>G        | p.Y73C     | NM_003079    | deleterious | high    |
| SMC1A     | 2000756  | 8243   | Missense    | g.chrX:53426627G>C    | c.2446C>G       | p.R816G    | NM_006306    | deleterious | medium  |
| SMR3B     | 07_16582 | 10879  | Indel       | g.chr4:7125554delC    | c.220delC       | p.P74fs    | NM_006685    |             |         |
| SNUPN     | 10_5342  | 10073  | Missense    | g.chr15:75913259C>G   | c.134G>C        | p.R45P     | NM_005701    | deleterious | medium  |
| SNX14     | 479      | 57231  | Missense    | g.chr6:86252955T>C    | c.1334A>G       | p.H445R    | NM_153816    | deleterious | medium  |
| SORCS1    | 131169   | 114815 | Missense    | g.chr10:108923870G>C  | c.415G>C        | p.E139Q    | NM_052918    | neutral     | neutral |
| SP100     | 2039     | 6672   | Missense    | g.chr2:231327186T>C   | c.1010T>C       | p.V337A    | NM_003113    | neutral     | neutral |
| SPATA13   | 352      | 221178 | Missense    | g.chr13:24797159G>T   | c.92G>T         | p.C31F     | NM_001166271 |             | neutral |
| SPATA7    | 36773720 | 55812  | Missense    | g.chr14:88904395G>C   | c.1429G>C       | p.A477P    | NM_018418    | neutral     | low     |
| SPEF2     | 11_3089  | 79925  | Missense    | g.chr5:35712980A>G    | c.2906A>G       | p.K969R    | NM_024867    | deleterious | low     |
| SPTBN1    | 1947     | 6711   | Missense    | g.chr2:54873496C>T    | c.4750C>T       | p.R1584C   | NM_003128    | deleterious | high    |
| SRCAP     | 09_4615  | 10847  | Missense    | g.chr16:30748617A>G   | c.7256A>G       | p.Q2419R   | NM_006662    | none        | neutral |
| SRCRB4D   | 11_17815 | 136853 | Missense    | g.chr7:76023182A>C    | c.986T>G        | p.L329R    | NM_080744    | neutral     | neutral |
| SSFA2     | 705      | 6744   | Missense    | g.chr2:182785370C>G   | c.3191C>T       | p.P1064L   | NM_001130445 | deleterious | medium  |
| STAM      | 6536     | 8027   | Missense    | g.chr10:17726706G>A   | c.158G>A        | p.R53K     | NM_003473    | deleterious | low     |
| STOX2     | 05_6986  | 56977  | Missense    | g.chr4:184931421G>A   | c.1430G>A       | p.R477Q    | NM_020225    | deleterious | medium  |
| STX12     | 11_3318  | 23673  | Missense    | g.chr1:28128213C>T    | c.313C>T        | p.R105C    | NM_177424    | deleterious | medium  |
| SYNDIG1L  | 05_6986  | 646658 | Missense    | g.chr14:74876153C>T   | c.295G>A        | p.E99K     | NM_001105579 | neutral     | neutral |
| SYNE1     | 36773720 | 23345  | Missense    | g.chr6:152786517C>T   | c.1808G>A       | p.S603N    | NM_182961    | deleterious | low     |
| SYTL5     | 11_3089  | 94122  | Missense    | g.chrX:37969646C>G    | c.1507C>G       | p.R503G    | NM_001163335 | deleterious | medium  |
| SZT2      | 07_16582 | 23334  | Missense    | g.chr1:43897471G>A    | c.2476G>A       | p.A826T    | NM_015284    |             | medium  |
| TANC1     | 2000120  | 85461  | Missense    | g.chr2:160074130G>T   | c.3367G>T       | p.G1123W   | NM_033394    | deleterious | high    |
| TANC2     | 09_4178  | 26115  | Missense    | g.chr17:61391974G>C   | c.1163G>C       | p.C388S    | NM_025185    | deleterious | low     |
| TATDN2    | 2020     | 9797   | Missense    | g.chr3:10291236C>G    | c.352C>G        | p.R118G    | NM_014760    | neutral     | neutral |
| TBC1D4    | 05_6986  | 9882   | Missense    | g.chr13:75923344G>T   | c.1370C>A       | p.P457Q    | NM_014832    | deleterious | medium  |
| TBC1D5    | 11_3318  | 9779   | Missense    | g.chr3:17550043T>G    | c.20A>C         | p.E7A      | NM_014744    | deleterious | medium  |
| TBC1D5    | 2039     | 9779   | Missense    | g.chr3:17333416G>T    | c.1216C>A       | p.L406I    | NM_014744    | neutral     | medium  |
| TCN1      | 2000136  | 6947   | Missense    | g.chr11:59631402G>C   | c.237C>G        | p.I79M     | NM_001062    | neutral     | low     |
| TEK1      | 6277     | 83659  | Missense    | g.chr17:6719267C>G    | c.371G>C        | p.G124A    | NM_053285    | deleterious | medium  |
| TEX15     | 07_16582 | 56154  | Nonsense    | g.chr8:30694753C>T    | c.7898G>A       | p.W2633*   | NM_031271    |             |         |
| TFAP2A    | 09_12352 | 7020   | Missense    | g.chr6:10410466T>G    | c.148A>C        | p.N50H     | NM_003220    | deleterious | medium  |
| THAP3     | 705      | 90326  | Missense    | g.chr1:6688576C>T     | c.92C>T         | p.P31L     |              | deleterious | medium  |
| THSD7A    | 10_5342  | 221981 | Missense    | g.chr7:11630233C>T    | c.1307G>A       | p.R436H    | NM_015204    | neutral     | low     |
| THSD7A    | 1781     | 221981 | Missense    | g.chr7:11468693A>G    | c.3124T>C       | p.S1042P   | NM_015204    | deleterious | medium  |
| TIGD6     | 1947     | 81789  | Indel       | g.chr5:149375303insC  | c.609_610insG   | p.G203fs,  | NM_030953    |             |         |
| TIMD4     | 36773720 | 91937  | Missense    | g.chr5:156381740G>A   | c.86C>T         | p.T29M     | NM_138379    | deleterious | low     |
| TLK1      | 122891   | 9874   | Missense    | g.chr2:171913024C>T   | c.506G>A        | p.R169H    | NM_012290    | neutral     | medium  |
| TLN1      | 352      | 7094   | Missense    | g.chr9:35719765T>C    | c.1550A>G       | p.D517G    | NM_006289    | neutral     | low     |
| TLN1      | 7441     | 7094   | Missense    | g.chr9:35713028C>G    | c.3365G>C       | p.R1122P   | NM_006289    | deleterious | medium  |
| TMC6      | 142990   | 11322  | Missense    | g.chr17:76115069C>T   | c.1870G>A       | p.V624I    | NM_007267    | neutral     | neutral |
| TMEM206   | 131169   | 55248  | Missense    | g.chr1:212558758A>C   | c.353T>G        | p.L118W    | NM_018252    | neutral     | medium  |
| TMEM237   | 980452   | 65062  | Missense    | g.chr2:202498103C>T   | c.326G>A        | p.R109Q    | NM_001044385 | neutral     | neutral |
| TNIP1     | 540      | 10318  | Missense    | g.chr5:150425486G>A   | c.872C>T        | p.P291L    | NM_006058    | deleterious | medium  |
| TNKS2     | 65115    | 80351  | Missense    | g.chr10:93621830C>T   | c.3356C>T       | p.P1119L   | NM_025235    | deleterious | medium  |
| TNN       | 540      | 63923  | Splice Site | g.chr1:175105958A>G   | c.3429A>G       | p.G1143G   | NM_022093    |             |         |
| TNPO2     | 06_2532  | 30000  | Missense    | g.chr19:12816371G>A   | c.1798C>T       | p.P600S    | NM_001136196 | deleterious | high    |
| TNPO3     | 36773720 | 23534  | Missense    | g.chr7:128630032C>T   | c.1481G>A       | p.R494Q    | NM_012470    | deleterious | low     |
| TNRC18    | 505      | 84629  | Indel       | g.chr7:5401258insG    | c.4628_4629insC | p.R1543fs, | NM_001080495 |             |         |
| TNRC6B    | 609      | 23112  | Missense    | g.chr22:40657967G>T   | c.247G>T        | p.A83S     | NM_001162501 | neutral     | medium  |
| TNRC6C    | 990149   | 57690  | Missense    | g.chr17:76069128C>T   | c.2870C>T       | p.A957V    | NM_018896    | deleterious | low     |
| TOB1      | 142990   | 10140  | Indel       | g.chr17:48940492insGG | c.887_888insCC  | p.I296fs,  | NM_005749    |             |         |
| TOMM40L   | 1781     | 84134  | Missense    | g.chr1:161198068G>C   | c.577G>C        | p.A193P    | NM_032174    | neutral     | low     |
| TP53      | 2237     | 7157   | Missense    | g.chr17:7578479G>A    | c.451C>T        | p.P151S    | NM_001126112 | deleterious | medium  |
| TP53      | 142990   | 7157   | Nonsense    | g.chr17:7578212G>A    | c.637C>T        | p.R213*    | NM_001126112 |             |         |
| TP53      | 36773720 | 7157   | Nonsense    | g.chr17:7574003G>A    | c.1024C>T       | p.R342*    | NM_001126112 |             |         |
| TRP1      | 2237     | 1200   | Missense    | g.chr11:6638547G>C    | c.493C>G        | p.P165A    | NM_000391    | neutral     | low     |
| TRAPP1C12 | 3492     | 51112  | Missense    | g.chr2:3464058G>A     | c.1628G>A       | p.R543H    | NM_016030    | deleterious | medium  |
| TRIM36    | 2237     | 55521  | Missense    | g.chr5:114469712T>C   | c.1379A>G       | p.E460G    | NM_018700    | deleterious | neutral |
| TRIM39    | 148632   | 56658  | Missense    | g.chr6:30297210C>G    | c.116C>G        | p.P39R     | NM_021253    | deleterious | high    |
| TRIP10    | 118135   | 9322   | Missense    | g.chr19:6744586C>G    | c.664C>G        | p.R222G    | NM_004240    | deleterious | medium  |

|         |          |          |          |                              |               |           |              |             |         |
|---------|----------|----------|----------|------------------------------|---------------|-----------|--------------|-------------|---------|
| TRIP13  | 6536     | 9319     | Missense | g.chr5:895042C>T             | c.233C>T      | p.T78I    | NM_004237    | neutral     | medium  |
| TRPC4   | 05_6986  | 7223     | Missense | g.chr13:38320391G>A          | c.580C>T      | p.R194C   | NM_016179    | deleterious | medium  |
| TRRAP   | 11_17815 | 8295     | Missense | g.chr7:98563369G>T           | c.7006G>T     | p.A2336S  | NM_003496    | neutral     | neutral |
| TRRAP   | 11_17815 | 8295     | Missense | g.chr7:98563370C>T           | c.7007C>T     | p.A2336V  | NM_003496    | neutral     | low     |
| TSPAN17 | 2012     | 26262    | Missense | g.chr5:176081974C>T          | c.535C>T      | p.R179W   | NM_012171    | deleterious | high    |
| TTC21A  | 7441     | 199223   | Missense | g.chr3:39178524C>T           | c.3251C>T     | p.A1084V  | NM_145755    | neutral     | neutral |
| TTC40   | 07_16582 | 54777    | Missense | g.chr10:134672672T>C         | c.4456A>G     | p.M1486V  | NM_017609    | neutral     | neutral |
| TTL     | 142990   | 150465   | Missense | g.chr2:113260508C>T          | c.625C>T      | p.H209Y   | NM_153712    | deleterious | medium  |
| TTL10   | 09_4178  | 254173   | Missense | g.chr1:1119350C>G            | c.1139C>G     | p.S380C   | NM_001130045 | neutral     | low     |
| TTN     | 2000120  | 7273     | Missense | g.chr2:179494077A>T          | c.36671T>A    | p.I12224N | NM_133378    | neutral     | medium  |
| TXNIP   | 2012     | 10628    | Indel    | g.chr1:145439839insT         | c.385_386insT | p.L129fs, | NM_006472    |             |         |
| TYMP    | 09_4178  | 1890     | Missense | g.chr22:50967961C>T          | c.178G>A      | p.A60T    | NM_001113756 | neutral     | medium  |
| UBE3B   | 122891   | 89910    | Missense | g.chr12:109936085A>G         | c.867A>G      | p.I289M   | NM_130466    | neutral     | neutral |
| UBL7    | 111097   | 84993    | Missense | g.chr15:74741661T>C          | c.748A>G      | p.S250G   | NM_032907    | neutral     | neutral |
| UCP2    | 7441     | 7351     | Missense | g.chr11:73687916C>G          | c.484G>C      | p.A162P   | NM_003355    | deleterious | high    |
| UGT3A2  | 1947     | 167127   | Missense | g.chr5:36039728T>C           | c.926A>G      | p.N309S   | NM_174914    | neutral     | neutral |
| UHRF1   | 11_17815 | 29128    | Missense | g.chr19:4930857G>A           | c.538G>A      | p.E180K   | NM_001048201 | deleterious | low     |
| UHRF1   | 1739     | 29128    | Missense | g.chr19:4930785G>A           | c.466G>A      | p.V156M   | NM_001048201 | neutral     | medium  |
| UNC79   | 3492     | 57578    | Missense | g.chr14:93963525A>G          | c.260A>G      | p.Y87C    | NM_020818    | deleterious | medium  |
| USP1    | 2128     | 7398     | Missense | g.chr1:62916300T>C           | c.2006T>C     | p.L669P   | NM_001017415 | deleterious | medium  |
| USP22   | 142990   | 23326    | Missense | g.chr17:20919166T>C          | c.737A>G      | p.H246R   | NM_015276    | deleterious | low     |
| USP29   | 2039     | 57663    | Missense | g.chr19:57640135A>C          | c.92A>C       | p.Q31P    | NM_020903    | neutral     | neutral |
| USP29   | 10_5283  | 57663    | Missense | g.chr19:57642522A>G          | c.2479A>G     | p.S827G   | NM_020903    | neutral     | low     |
| USP31   | 1346     | 57478    | Missense | g.chr16:23083513T>C          | c.2341A>G     | p.T781A   | NM_020718    | deleterious | medium  |
| USP35   | 671204   | 57558    | Nonsense | g.chr11:77910662G>A          | c.828G>A      | p.W276*   | NM_020798    |             |         |
| USP38   | 09_4178  | 84640    | Missense | g.chr4:144106607G>C          | c.4G>C        | p.D2H     | NM_032557    | deleterious | medium  |
| USP50   | 4133     | 373509   | Missense | g.chr15:50822032A>C          | c.913T>G      | p.F305V   | NM_203494    | neutral     | low     |
| WAPAL   | 7136     | 23063    | Missense | g.chr10:88203049G>C          | c.3394C>G     | p.L1132V  | NM_015045    | neutral     | low     |
| WARS2   | 236      | 10352    | Missense | g.chr1:119575617C>T          | c.1000G>A     | p.V334I   | NM_015836    | neutral     | low     |
| WDFY2   | 07_16582 | 115825   | Missense | g.chr13:52313214G>T          | c.628G>T      | p.V210F   | NM_052950    | neutral     | low     |
| WDFY4   | 36773720 | 57705    | Missense | g.chr10:49917965T>C          | c.188T>C      | p.I63T    | NM_020945    | neutral     | neutral |
| WDR53   | 6536     | 348793   | Missense | g.chr3:196281678C>T          | c.481G>A      | p.V161M   | NM_182627    | deleterious | low     |
| WDR87   | 2000756  | 83889    | Missense | g.chr19:38383983A>G          | c.2243T>C     | p.V748A   | NM_031951    | neutral     | low     |
| WFDC10B | 671204   | 280664   | Missense | g.chr20:44314624G>A          | c.8C>T        | p.P3L     | NM_172006    | deleterious | medium  |
| WTAP    | 4332     | 9589     | Missense | g.chr6:160176393C>G          | c.941C>G      | p.S314C   | NM_004906    | neutral     | medium  |
| WWC3    | 2237     | 55841    | Missense | g.chrX:10062190G>A           | c.526G>A      | p.D176N   | NM_015691    | deleterious | low     |
| XKR7    | 609      | 343702   | Missense | g.chr20:30584917C>T          | c.1397C>T     | p.A466V   | NM_001011718 | neutral     | low     |
| ZBTB16  | 142990   | 7704     | Missense | g.chr11:113934722C>T         | c.700C>T      | p.R234W   | NM_006006    | deleterious | low     |
| ZBTB45  | 131169   | 84878    | Missense | g.chr19:59025545T>C          | c.1412A>G     | p.K471R   | NM_032792    | deleterious | low     |
| ZCCHC16 | 122891   | 340595   | Nonsense | g.chrX:111698767C>T          | c.811C>T      | p.R271*   | NM_001004308 |             |         |
| ZFC3H1  | 1947     | 196441   | Missense | g.chr12:72017206C>T          | c.4678G>T     | p.V1560L  | NM_144982    | neutral     | low     |
| ZFH3    | 10_5283  | 463      | Missense | g.chr16:72821559C>T          | c.10616G>A    | p.C3539Y  | NM_006885    | none        | neutral |
| ZFP36L1 | 148632   | 677      | Missense | g.chr14:69256668T>C          | c.599A>G      | p.H200R   | NM_004926    | deleterious | medium  |
| ZHX2    | 2000120  | 22882    | Missense | g.chr8:123965309G>A          | c.1559G>A     | p.R520H   | NM_014943    | deleterious | low     |
| ZMI21   | 2020     | 57178    | Missense | g.chr10:81058173C>T          | c.1502C>T     | p.P501L   | NM_020338    | deleterious | low     |
| ZMYM2   | 2000120  | 7750     | Missense | g.chr13:20568053A>G          | c.841A>G      | p.N281D   | NM_003453    | deleterious | low     |
| ZNF143  | 9534     | 7702     | Missense | g.chr11:9530210T>C           | c.1192T>C     | p.F398L   | NM_003442    | deleterious | high    |
| ZNF16   | 2237     | 7564     | Missense | g.chr8:146157387C>A          | c.786G>T      | p.E262D   | NM_001029976 | neutral     | medium  |
| ZNF213  | 6277     | 7760     | Missense | g.chr16:3191241G>A           | c.1273G>A     | p.G425S   | NM_004220    | deleterious | medium  |
| ZNF217  | 7136     | 7764     | Missense | g.chr20:52198608G>C          | c.758C>G      | p.S253C   | NM_006526    | neutral     | neutral |
| ZNF311  | 65115    | 282890   | Missense | g.chr6:28967269G>A           | c.305C>T      | p.S102L   | NM_001010877 | deleterious | medium  |
| ZNF35   | 09_4178  | 7584     | Indel    | g.chr3:44700517_44700518insT | c.662_663insT | p.P221fs  | NM_003420    |             |         |
| ZNF395  | 148632   | 55893    | Missense | g.chr8:28206676C>T           | c.1396G>A     | p.V466I   | NM_018660    | neutral     | medium  |
| ZNF445  | 11_17815 | 353274   | Missense | g.chr3:44489097G>C           | c.2066C>G     | p.T689S   | NM_181489    | deleterious | neutral |
| ZNF462  | 2039     | 58499    | Missense | g.chr9:109773267G>T          | c.7477G>T     | p.A2493S  | NM_021224    | neutral     | low     |
| ZNF462  | 2237     | 58499    | Missense | g.chr9:109687875A>C          | c.1682A>C     | p.Q561P   | NM_021224    | none        | neutral |
| ZNF507  | 2000120  | 22847    | Nonsense | g.chr19:32844617C>G          | c.881C>G      | p.S294*   | NM_001136156 |             |         |
| ZNF513  | 2012     | 130557   | Missense | g.chr2:27600573G>A           | c.1465C>T     | p.R489C   | NM_144631    | deleterious | medium  |
| ZNF524  | 7441     | 147807   | Missense | g.chr19:56114128C>T          | c.650C>T      | p.A217V   | NM_153219    | neutral     | neutral |
| ZNF572  | 09_4615  | 137209   | Missense | g.chr8:125989681A>G          | c.1171A>G     | p.K391E   | NM_152412    | deleterious | medium  |
| ZNF630  | 1947     | 57232    | Missense | g.chrX:47919148A>G           | c.683T>C      | p.I228T   | NM_001037735 | deleterious | low     |
| ZNF75A  | 11_17815 | 7627     | Missense | g.chr16:3367445C>A           | c.467C>A      | p.A156E   | NM_153028    | neutral     | low     |
| ZNF783  | 1781     | 1.00E+08 | Missense | g.chr7:148963758G>T          |               |           |              |             | medium  |
| ZNF792  | 705      | 126375   | Missense | g.chr19:35449135T>C          | c.1624A>G     | p.T542A   | NM_175872    | deleterious | neutral |
| ZNF804A | 07_16582 | 91752    | Missense | g.chr2:185802558G>A          | c.2435G>A     | p.R812Q   | NM_194250    | deleterious | neutral |
| ZNF844  | 671204   | 284391   | Missense | g.chr19:12186146G>C          | c.211G>C      | p.V71L    | NM_001136501 | neutral     | neutral |
| ZZEF1   | 65103    | 23140    | Missense | g.chr17:3959588C>G           | c.5217G>C     | p.W1739C  | NM_015113    | deleterious | medium  |



## Supplementary Table 4. Significantly mutated CHASM genes

Includes genes with point mutations deemed significant by CHASM (BHFD<0.35), indels, splice site, and nonsense mutations.  
Additional mutations identified within these genes also are included.

| Hugo_Symbol | Sample ID | Chr:Pos             | Reference_Allele | Tumor_Allele | AA Change | Type     | Refseq_mRNA_Id | CHASM | PValue | BHFD |
|-------------|-----------|---------------------|------------------|--------------|-----------|----------|----------------|-------|--------|------|
| IDH1        | 7097      | chr2:209113112      | C                | T            | R132H     | Missense | NM_005896      | 0.04  | 0      | 0.05 |
| PIK3CA      | 2237      | chr3:178927980      | T                | C            | C420R     | Missense | NM_006218      | 0.05  | 0      | 0.05 |
| PIK3CA      | 2012      | chr3:178952072      | A                | G            | M1043V    | Missense | NM_006218      | 0.022 | 0      | 0.05 |
| PIK3CA      | 3492      | chr3:178921553      | T                | A            | N345K     | Missense | NM_006218      | 0.052 | 0      | 0.05 |
| TP53        | 2237      | chr17:7578479       | G                | A            | P151S     | Missense | NM_001126112   | 0.004 | 0      | 0.05 |
| TP53        | 142990    | chr17:7578212       | G                | A            | p.R213*   | Nonsense | NM_001126112   |       |        | N/A  |
| TP53        | 36773720  | chr17:7574003       | G                | A            | p.R342*   | Nonsense | NM_001126112   |       |        | N/A  |
| KLHL12      | 3492      | chr1:202863872      | T                | A            | I381F     | Missense | NM_021633      | 0.034 | 0      | 0.05 |
| SLC9A4      | 705       | chr2:103124727      | C                | T            | T463I     | Missense | NM_001011552   | 0.108 | 0.002  | 0.1  |
| FBXW7       | 609       | chr4:153249384      | C                | T            | R465H     | Missense | NM_033632      | 0.076 | 0.001  | 0.1  |
| PRKG1       | 1781      | chr10:52913011      | T                | G            | C118W     | Missense | NM_001098512   | 0.082 | 0.001  | 0.1  |
| PTEN        | 609       | chr10:89692946      | G                | C            | K144Q     | Missense | NM_000314      | 0.076 | 0.001  | 0.1  |
| PTEN        | 609       | g.chr10:89692905    | G                | --           | p.R130fs  | Indel    | NM_000314      |       |        | N/A  |
| MGEA5       | 118135    | chr10:103563588     | G                | C            | P314A     | Missense | NM_012215      | 0.104 | 0.002  | 0.1  |
| PAX2        | 2000120   | chr10:102566259     | C                | G            | A230G     | Missense | NM_000278      | 0.078 | 0.001  | 0.1  |
| KIAA1324L   | 36773720  | chr7:86541434       | C                | A            | G541V     | Missense | NM_152748      | 0.12  | 0.003  | 0.15 |
| CTNNB1      | 1947      | chr3:41278106       | G                | T            | R661L     | Missense | NM_001904      | 0.14  | 0.004  | 0.2  |
| GNB4        | 111097    | chr3:179137211      | G                | A            | A60G      | Missense | NM_021629      | 0.154 | 0.006  | 0.2  |
| FGFR4       | 505       | chr5:176518079      | G                | A            | G193R     | Missense | NM_002011      | 0.148 | 0.005  | 0.2  |
| TANC1       | 2000120   | chr2:160074130      | G                | T            | G1115W    | Missense | NM_001145909   | 0.156 | 0.006  | 0.2  |
| CALM2       | 2020      | chr2:47389754       | T                | C            | I28V      | Missense | NM_001743      | 0.218 | 0.011  | 0.25 |
| WDR53       | 6536      | chr3:196281678      | C                | T            | V161M     | Missense | NM_182627      | 0.178 | 0.008  | 0.25 |
| NT5C3       | 1739      | chr7:33055293       | G                | T            | L300I     | Missense | NM_001002010   | 0.256 | 0.014  | 0.25 |
| NT5C3       | 505       | chr7:33060887       | T                | G            | E151A     | Missense | NM_001002010   | 0.456 | 0.05   | 0.4  |
| RALA        | 609       | chr7:39726340       | T                | A            | V25E      | Missense | NM_005402      | 0.25  | 0.013  | 0.25 |
| MCM4        | 7441      | chr8:48883928       | C                | T            | R610C     | Missense | NM_182746      | 0.182 | 0.008  | 0.25 |
| SMARCA2     | 7441      | chr9:2115855        | G                | T            | G1164W    | Missense | NM_003070      | 0.254 | 0.014  | 0.25 |
| SMARCA2     | 2039      | chr9:2110356        | G                | T            | G1132V    | Missense | NM_003070      | 0.5   | 0.065  | 0.45 |
| SMARCA2     | 705       | chr9:2110338        | C                | T            | T1126I    | Missense | NM_003070      | 0.538 | 0.084  | 0.5  |
| TLN1        | 7441      | chr9:35713028       | C                | G            | R1122P    | Missense | NM_006289      | 0.19  | 0.01   | 0.25 |
| TLN1        | 352       | g.chr9:35719765     | T                | C            | p.D517G   | Missense | NM_006289      |       |        | N/A  |
| UCP2        | 7441      | chr11:73687916      | C                | G            | A162P     | Missense | NM_003355      | 0.24  | 0.012  | 0.25 |
| ATM         | 65115     | chr11:108188116     | G                | A            | G2072E    | Missense | NM_000051      | 0.164 | 0.007  | 0.25 |
| ATM         | 65115     | chr11:108196143     | C                | T            | R2227C    | Missense | NM_000051      | 0.404 | 0.037  | 0.35 |
| GRIN2B      | 7136      | chr12:13764773      | C                | T            | A556T     | Missense | NM_000834      | 0.234 | 0.012  | 0.25 |
| DHODH       | 236       | chr16:72056354      | A                | C            | I267L     | Missense | NM_001361      | 0.24  | 0.012  | 0.25 |
| CNDP2       | 65115     | chr18:72179722      | G                | A            | G233R     | Missense | NM_018235      | 0.194 | 0.01   | 0.25 |
| ACTB        | 10_5283   | chr7:5568871        | C                | T            | R95H      | Missense | NM_001101      | 0.206 | 0.011  | 0.25 |
| ACTB        | 671204    | chr7:5567474        | T                | C            | I345V     | Missense | NM_001101      | 0.244 | 0.013  | 0.25 |
| BRD1        | 671204    | chr22:50216803      | T                | C            | H388R     | Missense | NM_014577      | 0.236 | 0.012  | 0.25 |
| C6orf170    | 36773720  | chr6:121638817      | A                | G            | Y107H     | Missense | NM_152730      | 0.174 | 0.008  | 0.25 |
| HRAS        | 2000120   | chr11:534289        | C                | A            | G12C      | Missense | NM_176795      | 0.222 | 0.011  | 0.25 |
| NDUFS3      | 3492      | chr11:47603931      | A                | G            | N180D     | Missense | NM_004551      | 0.274 | 0.015  | 0.25 |
| RAB3GAP2    | 131169    | chr1:220364615      | C                | T            | A428T     | Missense | NM_012414      | 0.334 | 0.026  | 0.35 |
| ASAP2       | 7441      | chr2:9496405        | A                | G            | T420A     | Missense | NM_003887      | 0.394 | 0.036  | 0.35 |
| SPTBN1      | 1947      | chr2:54873496       | C                | T            | R1584C    | Missense | NM_003128      | 0.344 | 0.027  | 0.35 |
| DNAH5       | 7136      | chr5:13719002       | C                | A            | R4163I    | Missense | NM_001369      | 0.324 | 0.024  | 0.35 |
| MAGI2       | 2237      | chr7:77764508       | A                | T            | I954N     | Missense | NM_012301      | 0.392 | 0.036  | 0.35 |
| LARP4B      | 6536      | chr10:875513        | T                | C            | I313V     | Missense | NM_015155      | 0.388 | 0.035  | 0.35 |
| STAM        | 6536      | chr10:17726706      | G                | A            | R53K      | Missense | NM_003473      | 0.414 | 0.041  | 0.35 |
| CYP2C19     | 705       | chr10:96602752      | G                | A            | V374I     | Missense | NM_000769      | 0.368 | 0.033  | 0.35 |
| INTS4       | 2238      | chr11:77635919      | C                | T            | R464Q     | Missense | NM_033547      | 0.44  | 0.045  | 0.35 |
| FBN1        | 1739      | chr15:48797267      | A                | G            | C639R     | Missense | NM_000138      | 0.396 | 0.036  | 0.35 |
| CREBBP      | 1781      | chr16:3788618       | G                | A            | R1446C    | Missense | NM_004380      | 0.306 | 0.022  | 0.35 |
| CREBBP      | 2000756   | chr16:3786796       | C                | G            | W1434S    | Missense | NM_001079846   | 0.368 | 0.033  | 0.35 |
| CREBBP      | 671204    | chr16:3843416       | G                | C            | T396R     | Missense | NM_001079846   | 0.344 | 0.027  | 0.35 |
| CREBBP      | 3492      | chr16:3788596       | A                | T            | I1415N    | Missense | NM_001079846   | 0.328 | 0.025  | 0.35 |
| SMARCE1     | 1346      | chr17:38793763      | T                | C            | Y73C      | Missense | NM_003079      | 0.32  | 0.023  | 0.35 |
| BRCA1       | 2237      | chr17:41242984      | G                | C            | Q1388E    | Missense | NM_007294      | 0.39  | 0.035  | 0.35 |
| BRCA1       | 2237      | chr17:41243523      | G                | A            | S1342L    | Missense | NM_007294      | 0.368 | 0.033  | 0.35 |
| BUB1B       | 671204    | chr15:40462300      | G                | T            | D73Y      | Missense | NM_001211      | 0.452 | 0.048  | 0.35 |
| BUB1B       | 11_17815  | chr15:40510712      | T                | C            | I969P     | Missense | NM_001211      | 0.514 | 0.072  | N/A  |
| CAPN6       | 07_16582  | chrX:110489945      | C                | T            | V596I     | Missense | NM_014289      | 0.416 | 0.041  | 0.35 |
| DIS3        | 2000756   | chr13:73346338      | C                | T            | D458N     | Missense | NM_001128226   | 0.402 | 0.037  | 0.35 |
| ERC2        | 09_4178   | chr19:45872365      | G                | A            | T25I      | Missense | NM_001130867   | 0.316 | 0.023  | 0.35 |
| FOXK1       | 148632    | chr7:4796626        | A                | G            | N351S     | Missense | NM_001037165   | 0.296 | 0.02   | 0.35 |
| FTSJD1      | 11_6165   | chr16:71319399      | T                | C            | H142R     | Missense | NM_001099642   | 0.424 | 0.041  | 0.35 |
| FTSJD1      | 07_16582  | g.chr16:71319480C>T | C                | T            | p.W115*   | Nonsense | NM_001099642   |       |        | N/A  |
| GABRA3      | 09_4178   | chrX:151532936      | T                | A            | E36V      | Missense | NM_000808      | 0.428 | 0.042  | 0.35 |
| GLB1L       | 11_6165   | chr2:220107983      | G                | C            | D42E      | Missense | NM_024506      | 0.418 | 0.041  | 0.35 |
| GNAI2       | 05_6986   | chr3:50284505       | G                | C            | R2T       | Missense | NM_001166425   | 0.434 | 0.043  | 0.35 |
| GRIA2       | 11_17815  | chr4:158233974      | C                | T            | R158W     | Missense | NM_001083620   | 0.394 | 0.036  | 0.35 |
| LHFPL4      | 148632    | chr3:9594227        | C                | A            | W46L      | Missense | NM_198560      | 0.4   | 0.037  | 0.35 |
| MASTL       | 3492      | chr10:27458958      | C                | T            | T357M     | Missense | NM_001172304   | 0.358 | 0.031  | 0.35 |
| NR1H3       | 11_6165   | chr11:47290233      | G                | A            | D384N     | Missense | NM_001130101   | 0.342 | 0.027  | 0.35 |
| NR1H3       | 4133      | chr11:47282193      | C                | T            | R111C     | Missense | NM_001130102   | 0.398 | 0.037  | 0.35 |
| NUP50       | 148632    | chr22:45579373      | G                | C            | Q364H     | Missense | NM_153645      | 0.354 | 0.03   | 0.35 |
| NUP50       | 148632    | chr22:45579374      | C                | T            | L365F     | Missense | NM_153645      | 0.598 | 0.115  | 0.55 |
| OR11H1      | 3492      | chr22:16449539      | A                | G            | V89A      | Missense | NM_001005239   | 0.438 | 0.045  | 0.35 |
| PHC2        | 06_2532   | chr1:33820083       | G                | A            | H492Y     | Missense | NM_198040      | 0.394 | 0.036  | 0.35 |

|           |          |                            |     |     |                |             |              |       |       |      |
|-----------|----------|----------------------------|-----|-----|----------------|-------------|--------------|-------|-------|------|
| RLIM      | 2000756  | chrX:73812846              | G   | A   | L102F          | Missense    | NM_016120    | 0.376 | 0.033 | 0.35 |
| RORA      | 2000756  | chr15:60803461             | C   | T   | G207S          | Missense    | NM_134262    | 0.324 | 0.024 | 0.35 |
| TRIM39    | 148632   | chr6:30297210              | C   | G   | P39R           | Missense    | NM_172016    | 0.438 | 0.045 | 0.35 |
| TRPC4     | 05_6986  | chr13:38320391             | G   | A   | R194C          | Missense    | NM_001135956 | 0.42  | 0.041 | 0.35 |
| ZNF143    | 9534     | chr11:9530210              | T   | C   | F398L          | Missense    | NM_003442    | 0.354 | 0.03  | 0.35 |
| ABCA7     | 671204   | g.chr19:1046406            | G   | A   | p.V541_splice  | Splice Site | NM_019112    |       |       | N/A  |
| ACOX2     | 1781     | g.chr3:58510332            | C   | T   | p.R449R        | Splice Site | NM_003500    |       |       | N/A  |
| ACTG2     | 2000756  | g.chr2:74141809_74141810   | GA  | --  | p.E206fs       | Indel       | NM_001615    |       |       | N/A  |
| ALS2CR11  | 1947     | chr2:202430450             | --  | A   |                | Splice Site | NM_001168221 |       |       | N/A  |
| ALS2CR12  | 65115    | g.chr2:202207155           | C   | A   | p.L155_splice  | Splice Site | NM_139163    |       |       | N/A  |
| ANGPT2    | 2012     | g.chr8:6389855             | G   | A   | p.Q148*        | Nonsense    | NM_001147    |       |       | N/A  |
| APC       | 3492     | g.chr5:112176863           | C   | T   | p.R1858*       | Nonsense    | NM_001127511 |       |       | N/A  |
| ARHGAP44  | 05_6986  | g.chr17:12852538           | G   | T   | p.E315*        | Nonsense    | NM_014859    |       |       | N/A  |
| ARHGEF15  | 671204   | g.chr17:8216328            | C   | --  | p.G230fs       | Indel       | NM_173728    |       |       | N/A  |
| ARID1A    | 07_16582 | g.chr1:27105930_27105931   | --  | G   | p.G1847fs      | Indel       | NM_006015    |       |       | N/A  |
| ARID4B    | 1739     | g.chr1:235424022           | --  | ACT | p.A18delinsSA  | Indel       | NM_001206794 |       |       | N/A  |
| ARID5B    | 148632   | g.chr10:63850714           | G   | T   | p.E498*        | Nonsense    | NM_032199    |       |       | N/A  |
| ARNT2     | 9534     | g.chr15:80866561           | G   | A   | p.Q463Q        | Splice Site | NM_014862    |       |       | N/A  |
| ATCAY     | 6536     | g.chr19:3907733            | C   | T   | p.D120D        | Splice Site | NM_033064    |       |       | N/A  |
| AXIN1     | 148632   | g.chr16:396299             | C   | A   | p.E243*        | Nonsense    | NM_003502    |       |       | N/A  |
| BCOR      | 705      | g.chrX:39932914            | G   | T   | p.S562*        | Nonsense    | NM_001123385 |       |       | N/A  |
| BTN3A2    | 11_17815 | g.chr6:26370832            | G   | T   | p.D239_splice  | Splice Site | NM_007047    |       |       | N/A  |
| C14orf43  | 2039     | g.chr14:74193532           | C   | T   | p.V769_splice  | Splice Site | NM_194278    |       |       | N/A  |
| C16orf11  | 148632   | g.chr16:613726             | G   | --  | p.V144fs       | Indel       | NM_145270    |       |       | N/A  |
| C1orf141  | 540      | g.chr1:67592939            | T   | A   |                | Splice Site | NM_001013674 |       |       | N/A  |
| CA1       | 07_16582 | g.chr8:86245760_86245761   | --  | A   | p.L148fs       | Indel       | NM_001738    |       |       | N/A  |
| CEP135    | 1781     | g.chr4:56831978            | AAA | --  | p.333_333del,  | Indel       | NM_025009    |       |       | N/A  |
| CEP97     | 05_6986  | g.chr3:101451414_101451415 | --  | A   | p.P215fs       | Indel       | NM_024548    |       |       | N/A  |
| CHRNA1    | 1947     | g.chr17:7350821            | G   | --  |                | Splice Site | NM_000747    |       |       | N/A  |
| CHST5     | 142990   | g.chr16:75563606           | G   | A   | p.P226L        | Missense    | NM_024533    |       |       | N/A  |
| CHST5     | 6536     | g.chr16:75563521           | C   | T   | p.W254*        | Nonsense    | NM_024533    |       |       | N/A  |
| CNTNAP5   | 1781     | g.chr2:124999971           | G   | T   | p.W127_splice  | Splice Site | NM_130773    |       |       | N/A  |
| COL6A6    | 05_6986  | g.chr3:130285860           | C   | T   | p.R533*        | Nonsense    | NM_001102608 |       |       | N/A  |
| DHX9      | 09_4178  | g.chr1:182827275           | T   | A   | p.L237*        | Nonsense    | NM_001357    |       |       | N/A  |
| ECEL1     | 410      | g.chr2:233349690           | C   | T   | p.N322_splice  | Splice Site | NM_004826    |       |       | N/A  |
| EIF3B     | 4133     | g.chr7:2412384_2412385     | TG  | --  | p.S588fs       | Indel       | NM_003751    |       |       | N/A  |
| ENC1      | 2000756  | g.chr5:73931844_73931845   | --  | ACT | p.S156fs       | Indel       | NM_003633    |       |       | N/A  |
| ENC1      | 36773720 | g.chr5:73932240            | T   | A   | p.H24L         | Missense    | NM_003633    |       |       | N/A  |
| EP300     | 7441     | g.chr22:41565621           | G   | T   | p.G1429_splice | Splice Site | NM_001429    |       |       | N/A  |
| ERAP2     | 2000136  | g.chr5:96230974            | G   | T   | p.E384*        | Nonsense    | NM_022350    |       |       | N/A  |
| ERBB2IP   | 2000120  | g.chr5:65321806            | G   | T   | p.E340_splice  | Splice Site | NM_018695    |       |       | N/A  |
| ESRP1     | 36773720 | g.chr8:95654183            | G   | A   | p.V45_splice   | Splice Site | NM_017697    |       |       | N/A  |
| EXOC6     | 505      | g.chr10:94659373           | A   | T   | p.K144*        | Nonsense    | NM_019053    |       |       | N/A  |
| FAM194B   | 09_4178  | g.chr13:46149035           | C   | T   | p.W331*        | Nonsense    | NM_182542    |       |       | N/A  |
| FAM207A   | 07_16582 | g.chr21:46380085           | T   | G   | p.K118_splice  | Splice Site | NM_058190    |       |       | N/A  |
| FAT3      | 4332     | g.chr11:92539627           | C   | T   | p.R3065*       | Nonsense    | NM_001008781 |       |       | N/A  |
| FAT4      | 2128     | g.chr4:126371875           | C   | T   | p.S3235L       | Missense    | NM_024582    |       |       | N/A  |
| FAT4      | 7136     | g.chr4:126372080           | C   | G   | p.Y3303*       | Nonsense    | NM_024582    |       |       | N/A  |
| FILIP1    | 9534     | g.chr6:76022271            | G   | A   | p.R1093*       | Nonsense    | NM_015687    |       |       | N/A  |
| FKBP9     | 9534     | g.chr7:33014299_33014300   | --  | TT  | p.L98fs        | Indel       | NM_007270    |       |       | N/A  |
| GABRB1    | 7441     | g.chr4:47163485            | C   | T   | p.R154*        | Nonsense    | NM_000812    |       |       | N/A  |
| GRM4      | 2237     | g.chr6:34101247            | C   | T   | p.W9*          | Nonsense    | NM_000841    |       |       | N/A  |
| GSTM4     | 65115    | g.chr1:110199381           | C   | A   | p.Y28*         | Nonsense    | NM_000850    |       |       | N/A  |
| GTF3C1    | 122891   | g.chr16:27506083           | C   | T   | p.K926_splice  | Splice Site | NM_001520    |       |       | N/A  |
| HARS      | 2128     | g.chr5:140054646           | C   | A   | p.E423*        | Nonsense    | NM_002109    |       |       | N/A  |
| HOGA1     | 10_5283  | g.chr10:99358863           | G   | T   | p.E120*        | Nonsense    | NM_138413    |       |       | N/A  |
| HOXB3     | 4133     | g.chr17:46629590           | G   | --  | p.L83fs        | Indel       | NM_002146    |       |       | N/A  |
| IGSF9B    | 4133     | g.chr11:133790388          | G   | A   | p.R1078*       | Nonsense    | NM_014987    |       |       | N/A  |
| IL17RD    | 122891   | g.chr3:57136550            | TG  | --  | p.312_312del   | Indel       | NM_017563    |       |       | N/A  |
| IRAK1     | 2000136  | g.chrX:153278656           | C   | A   | p.E590*        | Nonsense    | NM_001569    |       |       | N/A  |
| IRAK1     | 4133     | g.chrX:153278880           | T   | C   | p.Y515C        | Missense    | NM_001569    |       |       | N/A  |
| ITM2B     | 1739     | g.chr13:48833055           | C   | A   | p.Y229*        | Nonsense    | NM_021999    |       |       | N/A  |
| KDM6A     | 11_3318  | g.chrX:44966782            | G   | T   | p.E1335_splice | Splice Site | NM_021140    |       |       | N/A  |
| KDM6A     | 148632   | g.chrX:44942839            | G   | A   | p.G1140E       | Missense    | NM_021140    |       |       | N/A  |
| KDM6A     | 11_3318  | g.chrX:44950030            | A   | G   | p.I1267V       | Missense    | NM_021140    |       |       | N/A  |
| KDM6A     | 3492     | g.chrX:44969442            | T   | C   | p.L1375P       | Missense    | NM_021140    |       |       | N/A  |
| KDM6A     | 671204   | g.chrX:44938456            | A   | G   | p.T1002A       | Missense    | NM_021140    |       |       | N/A  |
| KIAA1267  | 2039     | g.chr17:44117170           | T   | A   | p.K701*        | Nonsense    | NM_015443    |       |       | N/A  |
| KLHL4     | 36773720 | g.chrX:86888841            | C   | T   | p.R548*        | Nonsense    | NM_019117    |       |       | N/A  |
| KNTC1     | 36773720 | g.chr12:123052911          | C   | T   | p.R570*        | Nonsense    | NM_014708    |       |       | N/A  |
| KRTAP13-4 | 05_6986  | g.chr21:31802760           | G   | A   | p.W56*         | Nonsense    | NM_181600    |       |       | N/A  |
| LMLN      | 36773720 | g.chr3:197717491           | C   | T   | p.R331*        | Nonsense    | NM_033029    |       |       | N/A  |
| MAGI1     | 3492     | g.chr3:65415431_65415432   | AC  | --  | p.V644fs       | Indel       | NM_001033057 |       |       | N/A  |
| MAGT1     | 148632   | g.chrX:77131056            | C   | T   | p.W79*         | Nonsense    | NM_032121    |       |       | N/A  |
| MGA       | 505      | g.chr15:42021360           | A   | T   | p.I1220_splice | Splice Site | NM_001164273 |       |       | N/A  |
| MGA       | 11_3318  | g.chr15:42003509           | C   | T   | p.R1016*       | Nonsense    | NM_001080541 |       |       | N/A  |
| MPG       | 609      | g.chr16:129298             | --  | C   | p.T3fs,        | Indel       | NM_002434    |       |       | N/A  |
| MPOSPH9   | 3492     | g.chr12:123694652          | A   | T   | p.L230*        | Nonsense    | NM_022782    |       |       | N/A  |
| MUC16     | 05_6986  | g.chr19:8974101            | G   | A   | p.G14190G      | Splice Site | NM_024690    |       |       | N/A  |
| MUC16     | 05_6986  | g.chr19:8974101            | G   | A   | p.G14190G      | Splice Site | NM_024690    |       |       | N/A  |
| MUC16     | 65115    | g.chr19:9076729            | G   | A   | p.R3573C       | Missense    | NM_024690    |       |       | N/A  |
| MUC16     | 1781     | g.chr19:9069032            | G   | T   | p.S6138R       | Missense    | NM_024690    |       |       | N/A  |
| MUC4      | 4332     | g.chr3:195508174           | G   | T   | p.P3298H       | Missense    | NM_018406    |       |       | N/A  |
| MUC4      | 131169   | g.chr3:195492248           | C   | T   | p.W4436*       | Nonsense    | NM_018406    |       |       | N/A  |
| MYB       | 7441     | g.chr6:135518098           | G   | T   |                | Splice Site | NM_005375    |       |       | N/A  |
| MYB       | 7441     | g.chr6:135518099           | G   | T   |                | Splice Site | NM_005375    |       |       | N/A  |

|          |          |                            |     |    |                 |             |              |  |  |     |
|----------|----------|----------------------------|-----|----|-----------------|-------------|--------------|--|--|-----|
| MYCBP2   | 1947     | g.chr13:77663083           | G   | A  | c.10495C>T      | Nonsense    | NM_015057    |  |  | N/A |
| N4BP1    | 11_6165  | g.chr16:48595187           | G   | T  | c.1367C>A       | Nonsense    | NM_153029    |  |  | N/A |
| NAB2     | 505      | g.chr12:57484990           | TCC | -- | c.166_168del    | Indel       | NM_005967    |  |  | N/A |
| NCAM2    | 36773720 | g.chr21:22790859           | A   | T  | c.1450A>T       | Nonsense    | NM_004540    |  |  | N/A |
| NFIB     | 2020     | chr9:14120513              | GA  | -- | c.1170_1171del  | Indel       | NM_005596    |  |  | N/A |
| NFIB     | 540      | g.chr9:14150203            | G   | C  | c.747C>G        | Nonsense    | NM_005596    |  |  | N/A |
| NFIX     | 2012     | chr19:13184245             | --  | TT | c.632_633insTT  | Indel       | NM_002501    |  |  | N/A |
| NOTCH1   | 7097     | g.chr9:139412240           | C   | A  | c.1405G>T       | Missense    | NM_017617    |  |  | N/A |
| NOTCH1   | 3492     | g.chr9:139390907           | G   | C  | c.7284C>G       | Missense    | NM_017617    |  |  | N/A |
| NOTCH1   | 3492     | g.chr9:139390906           | G   | C  | c.7285C>G       | Missense    | NM_017617    |  |  | N/A |
| NOTCH1   | 2012     | g.chr9:139405607           | G   | A  | c.2584C>T       | Nonsense    | NM_017617    |  |  | N/A |
| OSR1     | 10_5283  | g.chr2:19552135_19552136   | TT  | -- | c.701_702delAA  | Indel       | NM_145260    |  |  | N/A |
| OTP      | 09_4178  | g.chr5:76926516            | A   | G  | c.551T>C        | Missense    | NM_032109    |  |  | N/A |
| PHF20    | 3492     | g.chr20:34430571_34430572  | --  | A  | c.160_161insA   | Nonsense    | NM_016436    |  |  | N/A |
| POU2F3   | 9534     | g.chr11:120175748          | C   | T  | c.454C>T        | Nonsense    | NM_014352    |  |  | N/A |
| PTPRG    | 380      | g.chr3:62204575            | G   | T  | c.2206G>T       | Nonsense    | NM_002841    |  |  | N/A |
| PTPRH    | 111097   | g.chr19:55708669           | C   | T  | c.1806G>A       | Nonsense    | NM_002842    |  |  | N/A |
| PTPRK    | 09_4178  | g.chr6:128410928_128410929 | --  | C  | c.1371_1372insG | Indel       | NM_002844    |  |  | N/A |
| RABGAP1  | 2012     | g.chr9:125748532           | G   | A  | c.424G>A        | Missense    | NM_012197    |  |  | N/A |
| RABGAP1  | 2012     | g.chr9:125748604           | G   | T  | c.496G>T        | Nonsense    | NM_012197    |  |  | N/A |
| RLF      | 2237     | g.chr1:40705233            | C   | G  | c.4859C>G       | Nonsense    | NM_012421    |  |  | N/A |
| RNF219   | 07_16582 | g.chr13:79212993           | C   | A  | c.514G>T        | Nonsense    | NM_024546    |  |  | N/A |
| RUNX1    | 980452   | g.chr21:36171600           | G   | C  | c.884C>G        | Nonsense    | NM_001001890 |  |  | N/A |
| RYR2     | 705      | g.chr1:237868513           | G   | A  | c.9450G>A       | Splice Site | NM_001035    |  |  | N/A |
| RYR3     | 2012     | g.chr15:34078011           | C   | A  | c.9417C>A       | Nonsense    | NM_001036    |  |  | N/A |
| RYR3     | 1346     | g.chr15:33872202           | A   | G  | c.1294A>G       | Missense    | NM_001036    |  |  | N/A |
| RYR3     | 671204   | g.chr15:33954455           | G   | A  | c.4724G>A       | Missense    | NM_001036    |  |  | N/A |
| RYR3     | 09_4615  | g.chr15:34157408           | A   | G  | c.14594A>G      | Missense    | NM_001036    |  |  | N/A |
| SCUBE3   | 111097   | g.chr6:35209689            | T   | A  | c.1417_splice   | Splice Site | NM_152753    |  |  | N/A |
| SELP     | 2237     | g.chr1:169586615           | A   | T  | c.132T>A        | Nonsense    | NM_003005    |  |  | N/A |
| SF3A3    | 148632   | g.chr1:38453346            | G   | A  | c.202C>T        | Nonsense    | NM_006802    |  |  | N/A |
| SLC22A12 | 1781     | g.chr11:64361031           | C   | T  | c.661C>T        | Splice Site | NM_144585    |  |  | N/A |
| SLC37A3  | 6277     | g.chr7:140055468           | C   | T  | c.618G>A        | Splice Site | NM_207113    |  |  | N/A |
| SMR3B    | 07_16582 | g.chr4:71255545            | C   | -- | c.220delC       | Indel       | NM_006685    |  |  | N/A |
| TEX15    | 07_16582 | g.chr8:30694753            | C   | T  | c.7898G>A       | Nonsense    | NM_031271    |  |  | N/A |
| TIGD6    | 1947     | g.chr5:149375303           | --  | C  | c.609_610insG   | Indel       | NM_030953    |  |  | N/A |
| TNN      | 540      | g.chr1:175105958           | A   | G  | c.3429A>G       | Splice Site | NM_022093    |  |  | N/A |
| TNRC18   | 505      | g.chr7:5401258             | --  | G  | c.4628_4629insC | Indel       | NM_001080495 |  |  | N/A |
| TOB1     | 142990   | g.chr17:48940492           | --  | GG | c.887_888insCC  | Indel       | NM_005749    |  |  | N/A |
| TXNIP    | 2012     | g.chr1:145439839           | --  | T  | c.385_386insT   | Indel       | NM_006472    |  |  | N/A |
| USP35    | 671204   | g.chr11:77910662           | G   | A  | c.828G>A        | Nonsense    | NM_020798    |  |  | N/A |
| ZCCHC16  | 122891   | g.chrX:111698767           | C   | T  | c.811C>T        | Nonsense    | NM_001004308 |  |  | N/A |
| ZNF35    | 09_4178  | g.chr3:44700517_44700518   | --  | T  | c.662_663insT   | Indel       | NM_003420    |  |  | N/A |
| ZNF507   | 2000120  | g.chr19:32844617           | C   | G  | c.881C>G        | Nonsense    | NM_001136156 |  |  | N/A |

## Supplementary Table 5. CHASM context table

CHASM v1.0.5

| Base/To | C*pG | CpG* | TpC* | G*pA | A  | C  | G  | T  |
|---------|------|------|------|------|----|----|----|----|
| A       | 9    | 62   | 13   | 18   |    | 13 | 47 | 20 |
| C       |      | 9    |      | 13   | 14 |    | 21 | 64 |
| G       | 10   |      | 19   |      | 54 | 14 |    | 18 |
| T       | 84   | 12   | 16   | 14   | 13 | 42 | 18 |    |

### Ratio

| Base/To | C*pG  | CpG*  | TpC*  | G*pA  | A     | C     | G     | T     |
|---------|-------|-------|-------|-------|-------|-------|-------|-------|
| A       | 0.015 | 0.100 | 0.021 | 0.029 | 0.000 | 0.021 | 0.076 | 0.032 |
| T       | 0.136 | 0.019 | 0.026 | 0.023 | 0.021 | 0.068 | 0.029 | 0.000 |
| C       | 0.000 | 0.015 | 0.000 | 0.021 | 0.023 | 0.000 | 0.034 | 0.104 |
| G       | 0.016 | 0.000 | 0.031 | 0.000 | 0.088 | 0.023 | 0.000 | 0.029 |

**Supplementary Table 6. GISTIC2.0 output of significantly altered peaks with associated genes**

| Cytoband | Gain/Loss | q value  | Residual q value | Wide peak boundaries      | Genes in wide peak                                                                                                                                                                              |
|----------|-----------|----------|------------------|---------------------------|-------------------------------------------------------------------------------------------------------------------------------------------------------------------------------------------------|
| 4q12     | Gain      | 8.35E-02 | 8.35E-02         | chr4:54439741-57173662    | KIAA1211                                                                                                                                                                                        |
| 10q11.22 | Gain      | 8.35E-02 | 8.35E-02         | chr10:46584418-46740464   | BMS1P1                                                                                                                                                                                          |
| 5q13.2   | Loss      | 1.25E-06 | 1.67E-05         | chr5:69784490-69804965    | SMA5                                                                                                                                                                                            |
| 6q23.3   | Loss      | 2.16E-05 | 2.16E-05         | chr6:135606716-135709084  | AHI1                                                                                                                                                                                            |
| 17q12    | Loss      | 6.36E-05 | 6.36E-05         | chr17:34581301-34625321   | CCL3L1                                                                                                                                                                                          |
| 4p16.1   | Loss      | 9.52E-05 | 9.52E-05         | chr4:9213282-9241393      | USP17                                                                                                                                                                                           |
| 1q21.1   | Loss      | 1.72E-04 | 1.72E-04         | chr1:144168171-144188821  | [SRGAP2P2]                                                                                                                                                                                      |
| 10p12.33 | Loss      | 6.81E-04 | 6.81E-04         | chr10:18064970-18168639   | hsa-mir-511-2, MIR511-2                                                                                                                                                                         |
| 17q21.31 | Loss      | 2.00E-03 | 2.00E-03         | chr17:44416824-44594703   | ARL17A                                                                                                                                                                                          |
| 12q12    | Loss      | 2.16E-05 | 3.99E-03         | chr12:44917052-50453489   | ACA2b, ACCN2                                                                                                                                                                                    |
| 7p11.2   | Loss      | 6.01E-03 | 6.01E-03         | chr7:56888731-56929688    | [MIR4283-1]                                                                                                                                                                                     |
| 10q11.22 | Loss      | 8.20E-03 | 8.20E-03         | chr10:49267840-49371362   | FRMPD2                                                                                                                                                                                          |
| 8q13.1   | Loss      | 9.29E-03 | 9.29E-03         | chr8:67361064-67405829    | C8orf46                                                                                                                                                                                         |
| 14q11.2  | Loss      | 9.29E-03 | 9.29E-03         | chr14:19685100-19806384   | [POTEG]                                                                                                                                                                                         |
| 16p13.11 | Loss      | 1.27E-02 | 1.27E-02         | chr16:16415188-16423199   | PKD1P1                                                                                                                                                                                          |
| 9p22.3   | Loss      | 2.08E-03 | 1.45E-02         | chr9:15920225-17166895    | CNTLN                                                                                                                                                                                           |
| 15q15.3  | Loss      | 1.65E-02 | 1.65E-02         | chr15:43940967-43987876   | CKMT1A                                                                                                                                                                                          |
| 12q12    | Loss      | 9.52E-05 | 1.81E-02         | chr12:42555313-42706784   | ZCRB1                                                                                                                                                                                           |
| 15q11.2  | Loss      | 2.92E-02 | 2.92E-02         | chr15:20747013-20776594   | GOLGA8C                                                                                                                                                                                         |
| 1p36.21  | Loss      | 3.34E-02 | 3.34E-02         | chr1:13183193-13328819    | PRAMEF3                                                                                                                                                                                         |
| 7q22.1   | Loss      | 3.34E-02 | 3.34E-02         | chr7:102136868-102194714  | SPDYE2                                                                                                                                                                                          |
| 15q13.1  | Loss      | 3.73E-02 | 3.73E-02         | chr15:28775191-28835310   | GOLGA8F                                                                                                                                                                                         |
| 5q13.2   | Loss      | 2.78E-04 | 4.48E-02         | chr5:70400536-70671617    | PMCHL2                                                                                                                                                                                          |
| 12q13.3  | Loss      | 7.22E-04 | 5.82E-02         | chr12:57125450-58088470   | hsa-mir-616, has-mir-1228, OS9                                                                                                                                                                  |
| 9p23     | Loss      | 6.01E-03 | 6.68E-02         | chr9:14088168-14117958    | NFIB                                                                                                                                                                                            |
| 12q24.33 | Loss      | 7.97E-02 | 7.97E-02         | chr12:132636768-133149100 | FBRSL1                                                                                                                                                                                          |
| 15q26.3  | Loss      | 7.97E-02 | 7.97E-02         | chr15:102297620-102302961 | [TARSL2]                                                                                                                                                                                        |
| 8p23.1   | Loss      | 9.09E-02 | 9.09E-02         | chr8:7596507-7679478      | DEFB107A                                                                                                                                                                                        |
| 9q13     | Loss      | 3.73E-02 | 9.09E-02         | chr9:67945162-68315950    | ANKRD20A1                                                                                                                                                                                       |
| 9q34.3   | Loss      | 9.09E-02 | 9.09E-02         | chr9:133553883-141213431  | hsa-mir-602, has-mir-4292, ACA17, hsa-mir-126, U36C, U62B, FAM157B                                                                                                                              |
| 9p12     | Loss      | 4.29E-02 | 9.11E-02         | chr9:41325222-41954730    | MGC21881                                                                                                                                                                                        |
| 8q24.3   | Loss      | 9.41E-02 | 9.41E-02         | chr8:145317721-145491107  | SCXB                                                                                                                                                                                            |
| 14q32.33 | Loss      | 1.04E-01 | 1.04E-01         | chr14:106370311-106379028 | [KIAA0125]                                                                                                                                                                                      |
| 9q21.11  | Loss      | 6.35E-02 | 1.16E-01         | chr9:70176686-70489871    | CBWD5                                                                                                                                                                                           |
| 12p13.31 | Loss      | 1.30E-01 | 1.30E-01         | chr12:7883332-7945496     | NANOG                                                                                                                                                                                           |
| 9p24.3   | Loss      | 1.95E-01 | 1.95E-01         | chr9:1-24561              | WASH1                                                                                                                                                                                           |
| 4q31.3   | Loss      | 2.20E-01 | 2.20E-01         | chr4:152679880-153560923  | hsa-mir-3140, TMEM154                                                                                                                                                                           |
| 13q14.3  | Loss      | 2.20E-01 | 2.20E-01         | chr13:35782795-115169878  | hsa-mir-1267, has-mir-4306, hsa-mir-623, hsa-mir-3170, hsa-mir-92a-1, hsa-mir-622, hsa-mir-3169, hsa-mir-1297, hsa-mir-759, hsa-mir-15a, ACA31, hsa-mir-3168, hsa-mir-621, hsa-mir-4305, ZNF828 |
| 7p22.3   | Loss      | 2.47E-01 | 2.47E-01         | chr7:550442-590032        | PRKAR1B                                                                                                                                                                                         |

**Supplementary Table 7. Mean CHASM gene expression**

Normalized to mean expression of 5.0960 with respect to Illumina HT-12 control probes

| Illumina Probe ID | Gene     | Mean Expression |
|-------------------|----------|-----------------|
| 1710193           | ABCA7    | 6.41864         |
| 2570100           | ABCA7    | 6.69078         |
| 5810091           | ABCA7    | 6.43061         |
| 1010114           | ACOX2    | 6.53886         |
| 4610390           | ACTB     | 11.9414         |
| 5270730           | ACTB     | 10.2536         |
| 5570132           | ACTB     | 11.6937         |
| 4610431           | ACTG2    | 10.2471         |
| 1450431           | ALS2CR11 | 6.34432         |
| 2100626           | ALS2CR12 | 6.48405         |
| 3180689           | ANGPT2   | 6.58412         |
| 3360398           | ANGPT2   | 6.46898         |
| 3450066           | ANGPT2   | 6.57173         |
| 5720722           | APC      | 6.46905         |
| 3610601           | ARHGEF15 | 6.30132         |
| 2030471           | ARID1A   | 6.28684         |
| 6280411           | ARID1A   | 7.45068         |
| 2470603           | ARID4B   | 7.96643         |
| 2940722           | ARID4B   | 6.7175          |
| 6590722           | ARID4B   | 7.5288          |
| 1410408           | ARID5B   | 8.19648         |
| 4180307           | ARNT2    | 6.9004          |
| 2750674           | ASAP2    | 6.62593         |
| 5340646           | ASAP2    | 7.00366         |
| 7050577           | ATCAY    | 6.304           |
| 580537            | ATM      | 6.28938         |
| 4250008           | ATM      | 7.17261         |
| 6840605           | ATM      | 7.03161         |
| 7330592           | ATM      | 6.49995         |
| 3460754           | AXIN1    | 6.88441         |
| 5550398           | AXIN1    | 6.48102         |
| 510576            | BCOR     | 7.15039         |
| 1770435           | BCOR     | 6.58323         |
| 6760273           | BCOR     | 6.52156         |
| 540411            | BRCA1    | 6.36148         |
| 2810465           | BRCA1    | 6.63313         |
| 3120672           | BRCA1    | 6.49771         |
| 5820703           | BRCA1    | 6.46249         |
| 1440450           | BRD1     | 6.85148         |
| 2570253           | BTN3A2   | 6.5883          |
| 4610674           | BTN3A2   | 6.60382         |
| 1090047           | BUB1B    | 6.47398         |
| 6660544           | C10orf65 | 6.59107         |
| 5560154           | C14orf43 | 6.41611         |
| 5890468           | C14orf43 | 6.46055         |
| 6370201           | C14orf43 | 7.00858         |
| 1030170           | C16orf11 | 6.44277         |
| 6020437           | C16orf11 | 6.41933         |
| 3400286           | C1orf141 | 6.27277         |
| 6650253           | C1orf141 | 6.68719         |
| 620440            | C21orf70 | 6.67855         |
| 2600519           | C21orf70 | 6.68704         |
| 3170746           | C21orf70 | 6.46604         |
| 110037            | C6orf170 | 6.61991         |
| 3930671           | C6orf170 | 7.22948         |
| 2190139           | CA1      | 6.29509         |
| 7100711           | CALM2    | 10.5844         |
| 2120379           | CAPN6    | 6.7934          |
| 270022            | CEP135   | 6.53797         |
| 7400575           | CEP97    | 6.50661         |
| 7650639           | CHRNB1   | 6.72915         |
| 2630114           | CHST5    | 6.30131         |
| 3940725           | CHST5    | 6.48897         |
| 3390017           | CNDP2    | 8.90573         |
| 1580243           | CNTNAP5  | 6.33225         |
| 6660079           | CNTNAP5  | 6.28003         |
| 780520            | COL6A6   | 6.45451         |

|         |          |         |
|---------|----------|---------|
| 6560438 | CREBBP   | 6.67332 |
| 6840148 | CREBBP   | 7.4646  |
| 3360253 | CTNNB1   | 6.59003 |
| 3800671 | CTNNB1   | 7.48288 |
| 4230376 | CTNNB1   | 6.45225 |
| 4260379 | CTNNB1   | 7.52588 |
| 5130681 | CTNNB1   | 6.51957 |
| 5810184 | CTNNB1   | 6.66339 |
| 7210095 | CTNNB1   | 6.47108 |
| 5220717 | CYP2C19  | 6.46303 |
| 630475  | DHODH    | 6.57291 |
| 7380427 | DHODH    | 6.47309 |
| 2900379 | DHX9     | 6.51653 |
| 3930689 | DHX9     | 6.84736 |
| 6900725 | DHX9     | 6.82191 |
| 7210008 | DHX9     | 6.43846 |
| 4640719 | DIS3     | 6.68548 |
| 2350554 | DNAH5    | 6.31266 |
| 6660747 | ECEL1    | 6.33332 |
| 4390136 | EIF3B    | 9.25813 |
| 5390280 | EIF3B    | 6.69108 |
| 6290603 | EIF3B    | 7.92255 |
| 7150563 | ENC1     | 7.52845 |
| 7570068 | EP300    | 6.72496 |
| 2260731 | ERAP2    | 6.72397 |
| 1450441 | ERBB2IP  | 6.49776 |
| 4480037 | ERBB2IP  | 6.43102 |
| 4260435 | ERCC2    | 6.82322 |
| 2850014 | EXOC6    | 6.53012 |
| 7330196 | EXOC6    | 6.68605 |
| 7570278 | EXOC6    | 6.33052 |
| 2340253 | FAT3     | 6.58899 |
| 1190338 | FAT4     | 6.53176 |
| 6200095 | FAT4     | 6.47306 |
| 4480593 | FBN1     | 6.3859  |
| 1850504 | FBXW7    | 7.27674 |
| 3930184 | FBXW7    | 6.60274 |
| 5560661 | FBXW7    | 7.18559 |
| 6450309 | FBXW7    | 6.43277 |
| 70520   | FGFR4    | 6.36485 |
| 4120433 | FGFR4    | 6.2827  |
| 6660240 | FGFR4    | 6.34323 |
| 6200600 | FILIP1   | 6.47257 |
| 4260114 | FKBP9    | 6.3848  |
| 5290086 | FKBP9    | 6.51746 |
| 460192  | FLJ32682 | 6.45708 |
| 6380168 | FOXP1    | 6.5135  |
| 6860544 | FOXP1    | 7.17025 |
| 5570615 | FTSJD1   | 6.69214 |
| 2340093 | GABRA3   | 6.44828 |
| 6130692 | GABRB1   | 6.53772 |
| 2490360 | GLB1L    | 6.47836 |
| 1300730 | GNAI2    | 7.64595 |
| 1660246 | GNB4     | 6.67904 |
| 2940484 | GNB4     | 6.62279 |
| 6220750 | GRIA2    | 6.60288 |
| 130091  | GRIN2B   | 6.36967 |
| 1660494 | GRIN2B   | 6.28    |
| 6840255 | GRM4     | 6.49204 |
| 4060707 | GSTM4    | 6.55129 |
| 6900592 | GSTM4    | 6.42155 |
| 2750296 | GTF3C1   | 6.82225 |
| 3940551 | HARS     | 7.77877 |
| 2350575 | HOXB3    | 6.48609 |
| 1770753 | HRAS     | 6.69321 |
| 7160093 | HRAS     | 6.41346 |
| 3180048 | IDH1     | 6.84564 |
| 6270670 | IDH1     | 7.50331 |
| 1240180 | IGSF9B   | 6.58877 |
| 3450091 | IL17RD   | 6.55565 |
| 4060017 | IL17RD   | 8.63645 |
| 4890193 | IL17RD   | 6.48933 |

|         |           |         |
|---------|-----------|---------|
| 990037  | INTS4     | 6.58391 |
| 1660441 | INTS4     | 6.5151  |
| 2810121 | INTS4     | 7.27047 |
| 4040564 | IRAK1     | 7.70589 |
| 540347  | ITM2B     | 6.50376 |
| 6380315 | ITM2B     | 9.68494 |
| 1580338 | KIAA1267  | 7.61999 |
| 1850079 | KIAA1267  | 7.5746  |
| 2650753 | KIAA1324L | 6.56477 |
| 6660152 | KLHL12    | 7.08515 |
| 6840500 | KLHL12    | 6.80441 |
| 1050072 | KLHL4     | 6.32581 |
| 1510767 | KLHL4     | 6.27374 |
| 3190524 | KNTC1     | 6.98275 |
| 5130390 | KRTAP13-4 | 6.57257 |
| 6100619 | LARP4B    | 7.54022 |
| 4120093 | LHFPL4    | 6.41936 |
| 4540047 | LMLN      | 6.39357 |
| 870402  | MAGI1     | 6.65257 |
| 1070296 | MAGI1     | 6.42785 |
| 7210091 | MAGI1     | 6.31298 |
| 2260754 | MAGI2     | 6.35689 |
| 3190626 | MAGT1     | 9.22476 |
| 20521   | MASTL     | 6.6382  |
| 580470  | MASTL     | 6.36352 |
| 2630711 | MCM4      | 6.89527 |
| 6020170 | MCM4      | 6.9828  |
| 3190364 | MGA       | 6.97449 |
| 4780605 | MGA       | 6.56299 |
| 6840356 | MGEA5     | 8.2441  |
| 1850128 | MPG       | 6.4619  |
| 2600189 | MPG       | 6.60663 |
| 5720403 | MPG       | 6.30717 |
| 6590707 | MPHOSPH9  | 6.72824 |
| 2490070 | MUC16     | 6.65653 |
| 110471  | MUC4      | 6.35982 |
| 2450072 | MUC4      | 6.5567  |
| 4260450 | MUC4      | 6.62504 |
| 4900014 | MUC4      | 6.6459  |
| 5260746 | MUC4      | 6.34376 |
| 7380670 | MYB       | 7.52676 |
| 6650451 | MYCBP2    | 7.26145 |
| 70743   | N4BP1     | 6.54058 |
| 2680561 | N4BP1     | 6.92053 |
| 6250440 | NAB2      | 6.9002  |
| 5080292 | NCAM2     | 6.35942 |
| 1710168 | NDUFS3    | 8.36375 |
| 5960133 | NFIB      | 10.7585 |
| 5720129 | NFIX      | 9.17124 |
| 5080167 | NOTCH1    | 8.03905 |
| 3710450 | NR1H3     | 6.90927 |
| 3940520 | NT5C3     | 7.63872 |
| 7000398 | NT5C3     | 7.0866  |
| 1990674 | NUP50     | 6.5316  |
| 3990356 | NUP50     | 6.28937 |
| 5890291 | NUP50     | 6.32132 |
| 5690673 | OR11H1    | 6.44695 |
| 6980414 | OR11H1    | 6.83878 |
| 3940500 | OSR1      | 8.5101  |
| 1940500 | OTP       | 6.46938 |
| 2030477 | OTP       | 6.55887 |
| 3360338 | PAX2      | 6.34521 |
| 4830136 | PAX2      | 6.29702 |
| 6450767 | PAX2      | 6.5111  |
| 830142  | PHC2      | 6.59459 |
| 1500524 | PHC2      | 6.5853  |
| 6020452 | PHC2      | 6.31558 |
| 4210241 | PHF20     | 6.87943 |
| 1240520 | PIK3CA    | 6.25603 |
| 4880367 | PIK3CA    | 6.72328 |
| 2070661 | POU2F3    | 6.29587 |
| 2640093 | POU2F3    | 6.67684 |



|         |          |         |
|---------|----------|---------|
| 6290082 | PRKG1    | 6.54854 |
| 6860288 | PRKG1    | 6.36815 |
| 6840072 | PTEN     | 7.08986 |
| 450369  | PTPRG    | 6.66824 |
| 7400768 | PTPRH    | 6.50396 |
| 6280201 | PTPRK    | 7.55192 |
| 5700273 | RAB3GAP2 | 7.50377 |
| 2850538 | RABGAP1  | 8.38912 |
| 2810382 | RALA     | 8.06641 |
| 110754  | RBM35A   | 6.71827 |
| 840010  | RICH2    | 6.8414  |
| 520309  | RLF      | 6.78895 |
| 1430333 | RNF12    | 6.47884 |
| 1470402 | RNF12    | 6.46334 |
| 7040368 | RNF12    | 6.54287 |
| 2510292 | RNF219   | 7.23447 |
| 1110180 | RORA     | 6.65296 |
| 3940703 | RORA     | 6.56412 |
| 4390553 | RORA     | 6.31989 |
| 4760072 | RORA     | 6.40746 |
| 6110500 | RORA     | 6.28688 |
| 6770240 | RORA     | 6.47536 |
| 4390438 | RUNX1    | 6.30011 |
| 7050278 | RUNX1    | 6.37665 |
| 7400368 | RUNX1    | 7.73119 |
| 1660241 | RYR2     | 6.5425  |
| 430253  | RYR3     | 6.42735 |
| 240070  | SCUBE3   | 6.35505 |
| 4810468 | SELP     | 6.34337 |
| 1230747 | SF3A3    | 7.80757 |
| 1450500 | SLC22A12 | 6.50205 |
| 4640324 | SLC22A12 | 6.47542 |
| 5690575 | SLC22A12 | 6.30119 |
| 3420332 | SLC37A3  | 7.34276 |
| 3800397 | SLC37A3  | 6.92143 |
| 7560377 | SLC37A3  | 6.64469 |
| 3130360 | SLC9A4   | 6.46489 |
| 7320619 | SLC9A4   | 6.50906 |
| 1770086 | SMARCA2  | 6.52815 |
| 5290474 | SMARCA2  | 8.3582  |
| 2650064 | SMARCE1  | 7.46816 |
| 620326  | SMR3B    | 7.60332 |
| 1770037 | SPTBN1   | 6.76924 |
| 2750609 | SPTBN1   | 6.35707 |
| 5390487 | SPTBN1   | 8.14686 |
| 770619  | STAM     | 6.65039 |
| 3990324 | TANC1    | 7.3938  |
| 6620553 | TEX15    | 6.56392 |
| 1050133 | TIGD6    | 6.62346 |
| 6650433 | TLN1     | 6.843   |
| 2750242 | TNN      | 6.6276  |
| 2190367 | TNRC18   | 6.60398 |
| 2630162 | TNRC18   | 6.4807  |
| 4390300 | TOB1     | 8.3704  |
| 4180500 | TP53     | 6.97037 |
| 160240  | TRIM39   | 6.29509 |
| 6040703 | TRIM39   | 6.76473 |
| 7510273 | TRIM39   | 6.43063 |
| 10367   | TRPC4    | 6.5029  |
| 1240440 | TXNIP    | 9.95036 |
| 6580059 | UCP2     | 6.68936 |
| 6510468 | USP35    | 6.64416 |
| 2710731 | UTX      | 7.02903 |
| 430731  | WDR53    | 6.40324 |
| 240438  | ZCCHC16  | 6.30308 |
| 5700162 | ZCCHC16  | 6.43173 |
| 3830403 | ZNF143   | 6.93108 |
| 5090010 | ZNF35    | 6.50586 |
| 7380131 | ZNF507   | 6.5777  |

## Supplementary Table 8. Whole genome coverage data

Genotyping performed using HumanOmni 2.5-8v1

| Whole Genome Coverage Data                  | 2012-TU       | 2012-NL       | 2128-TU       | 2128-NL       | 505-TU       |
|---------------------------------------------|---------------|---------------|---------------|---------------|--------------|
| Sequenced fragment length                   | 341 +/- 28 bp | 321 +/- 22 bp | 359 +/- 23 bp | 333 +/- 24 bp | 339 +/- 23bp |
| Passing Filter Data Volume (Gigabases)      | 116.7         | 121           | 119.3         | 112.9         | 128.3        |
| Passing Filter and Aligned Data (Gigabases) | 103.4         | 106.7         | 106           | 100.1         | 114          |
| % Passing Filter and Aligned Bases >= Q30   | 87.4%         | 87.3%         | 83.6%         | 90.9%         | 83.1%        |
| Non-N Reference Mean Coverage               | 34.1x         | 35.1x         | 34.8x         | 32.8x         | 37.9x        |
| Percentage of Non-N Reference Covered       | 97.9%         | 97.9%         | 97.9%         | 97.9%         | 98.2%        |
| Genotyping Array % Concordance              | 98.7%         | 99.3%         | 99.3%         | 99.3%         | 99.3%        |

| Whole Genome Coverage Data                  | 505-NL        | 6536-TU       | 6536-NL       | 131169-TU     | 131169-NL     |
|---------------------------------------------|---------------|---------------|---------------|---------------|---------------|
| Sequenced fragment length                   | 342 +/- 21 bp | 338 +/- 16 bp | 333 +/- 15 bp | 343 +/- 16 bp | 323 +/- 17 bp |
| Passing Filter Data Volume (Gigabases)      | 122.1         | 126.5         | 127.9         | 155           | 119.7         |
| Passing Filter and Aligned Data (Gigabases) | 108.3         | 113.3         | 113.6         | 139.1         | 107.9         |
| % Passing Filter and Aligned Bases >= Q30   | 89.4%         | 86.9%         | 87.4%         | 85.7%         | 88.9%         |
| Non-N Reference Mean Coverage               | 35.8x         | 37.4x         | 37.4x         | 45.3x         | 35.6x         |
| Percentage of Non-N Reference Covered       | 98.1%         | 98.1%         | 98.1%         | 97.9%         | 97.8%         |
| Genotyping Array % Concordance              | 99.3%         | 99.3%         | 99.3%         | 99.3%         | 99.3%         |

| Mean  |
|-------|
| 337.2 |
| 124.9 |
| 111.2 |
| 87.1% |
| 36.6x |
| 98.0% |
| 99.2% |

**Supplementary Table 9. Validated ACC structural variants**

| SampleID | SV Type | Gene 1   | Distance To Gene 2 (bp) | Breakpoint 1 (hg19) | Gene 2   | Distance To Gene 2 (bp) | Breakpoint 2 (hg19) | Fwd Primer                 | Rev Primer                |
|----------|---------|----------|-------------------------|---------------------|----------|-------------------------|---------------------|----------------------------|---------------------------|
| 000505   | DEL     | MAN1A1   | 163162                  | chr6:119834088      | MYB      | 0                       | chr6:135534745      | CAAACCTCGTCACTTAAAGCCATCTT | GCCTCCTGTTAAAAGTCAAGTTCTG |
| 000505   | CTX     | NFIB     | 0                       | chr9:14113737       | MAN1A1   | 163839                  | chr6:119834765      | CAATTTCTGCCTCTCCCTAAAACAA  | GAAGATACCTCAGTCCTTTCCCTGT |
| 000505   | CTX     | MYB      | 0                       | chr6:135534691      | NFIB     | 0                       | chr9:14113422       | CTTCTCTTTTGTCTGAGTGAACACC  | GAGCTTCAGGGGATATATGACTCAG |
| 000505   | CTX     | MSN      | 0                       | chrX:64961204       | RLN2     | 15822                   | chr9:5284046        | GTGCCCTGATCCAAGTTTACTCAA   | GAGCCTTTCACACTTTCCAG      |
| 002012   | INS     | FGFR2    | 0                       | chr10:123276317     | FGFR2    | 240036                  | chr10:122997808     | AGCAAATATTCACAGAGCAGATTCG  | GGTTCTGGGTCTCATTCTGATATT  |
| 002012   | INS     | RBMS3    | 0                       | chr3:29657439       | RBMS3    | 0                       | chr3:29619344       | GAATTCATTTCTAAGTGACCCA     | GCTCTTCAGTCACACATTTATAGGC |
| 002012   | INS     | RBMS3    | 0                       | chr3:29753932       | RBMS3    | 0                       | chr3:29687489       | CATTTTCCCTCGAATAAAGCCTAC   | AGAGTCTCAGCCACTTTTATTGACT |
| 002012   | DEL     | TAX1BP1  | 0                       | chr7:27783375       | TAX1BP1  | 0                       | chr7:27783724       | TGGGTCATATGTTGAGTGTACTAA   | GGGCACTCAGTTATGTATACAGCTA |
| 002012   | CTX     | PIK3R1   | 185096                  | chr5:67782745       | KANK1    | 45812                   | chr9:791918         | TGGAGTTCAAATCTACCAAGCTTCA  | ACAATGCAGTGACTATTGTGGAATG |
| 002128   | ITX     | SKAP2    | 34220                   | chr7:26938561       | SNX10    | 74036                   | chr7:26487985       | CTTACTGCATCATTTAGCTGTGACC  | TATCGTAGTTGTAATGCTTGGAGGG |
| 006536   | CTX     | ADAMTS20 | 131085                  | chr12:43616927      | CBFA2T2  | 0                       | chr20:32211711      | GAGAGAATTTGATTGCTGTGGTTGT  | ATAGGGTTAATGCATGGACACAGTA |
| 006536   | INS     | HOXC4    | 0                       | chr12:54439321      | ADAMTS20 | 33661                   | chr12:43714351      | TCCATAGTGAACATAACAGTCTCG   | AGTAGAGAGTAGGCTTGCATTGAA  |
| 006536   | DEL     | NELL2    | 0                       | chr12:44948178      | ATXN7L3B | 487313                  | chr12:74444238      | CCCAAATATGATGTAGTAAAGCGCA  | AAGGGAGTAGTGTAAAGAGGATC   |
| 006536   | INS     | SLC16A7  | 497644                  | chr12:60673052      | CALCOCO1 | 0                       | chr12:54114812      | GGCAGAGAATTACAGTGTGCTTAG   | GAGCTCTACCATCTTCCAAATG    |
| 006536   | ITX     | RNF150   | 0                       | chr4:141988848      | TTC29    | 18525                   | chr4:147609654      | CAATCAGCCCAATGAAAGAACCA    | ATCCAGCTGTCTACTCTTTGCAACT |
| 006536   | DEL     | VAV2     | 0                       | chr9:136804823      | QSOX2    | 0                       | chr9:139127613      | AAATTTATCGTGGCAGACTTTCAGG  | TGCGAAGTTCATACATCATCCTTA  |
| 131169   | DEL     | GIP      | 0                       | chr17:47037095      | GIP      | 0                       | chr17:47037656      | AATATTAGTGCCTCGATTCTGGGA   | AAATAGTTAGCCAGAGACTGTTCC  |

Legend: INS: insertion; DEL: deletion; CTX: interchromosomal translocation; ITX: intrachromosomal translocation; SV: structural variant

### **Supplementary Note.**

Tumor samples with matched normal tissue or blood were obtained at the time of surgery from Memorial Sloan-Kettering Cancer Center (New York, NY, USA), University of Pittsburgh Medical Center (Pittsburgh, PA, USA), VU University Medical Center (Amsterdam, Netherlands), and National Cancer Centre Singapore (Singapore). All patients provided informed consent as part of institutional review board-approved protocols at their respective institutions. Collected phenotypic data elements were deidentified and included age, gender, stage, disease site, histologic features, adjuvant treatment, and disease status (**Supplementary Table 2**).
